# Supplementary material for: Platelet Count and Survival after Cancer
Source: MDPI journal article supplement (doi:10.3390/cancers14030549), 2022-01-21
Supplement: s1 [file s1]

Supplementary Material

# Platelet Count and Survival after Cancer

Vasily Giannakeas, Joanne Kotsopoulos, Jennifer D. Brooks, Matthew C. Cheung, Laura Rosella, Lorraine Lipscombe, Mohammad R. Akbari, Peter C. Austin and Steven A. Narod

**Table S1.** Description of administrative datasets used.

| Datasets                                                                       | Years used | Description of use                                                                                                                                                                                                                                                                                                         |
|--------------------------------------------------------------------------------|------------|----------------------------------------------------------------------------------------------------------------------------------------------------------------------------------------------------------------------------------------------------------------------------------------------------------------------------|
| Population and demographics                                                    |            |                                                                                                                                                                                                                                                                                                                            |
| Client Agency Program Enrollment (CAPE)                                        | 1999–2016  | The CAPE dataset indicates an Ontario resident’s enrollment to a primary care/ family doctor along with a start and end date of the enrollment.                                                                                                                                                                            |
|                                                                                |            | The CAPE dataset was used to determine what individuals in the cohort were rostered to a primary care physician on the index date.                                                                                                                                                                                         |
| Immigration, Refugees and Citizenship Canada Permanent Resident Database (CIC) | 1985–2016  | The CIC dataset includes immigration application records for individuals in Ontario.                                                                                                                                                                                                                                       |
|                                                                                |            | The CIC dataset was used to capture immigration status among individuals in the cohort. The landing date was used to further classify an individual as a recent immigrant ( $\leq 10$ years from index date) or past immigrant ( $>10$ years from index date).                                                             |
| Office of the Registrar General – Deaths (ORGD)                                | 2007–2017  | The ORGD dataset contains cause of death information for Ontario residents.                                                                                                                                                                                                                                                |
|                                                                                |            | The ORGD dataset was used to derive cancer-specific or non-specific death for individuals in the cohort that had a death date in the follow-up period. The underlying cause of death variable, along with ICD-9 codes and the index cancer type were used to derive this variable.                                         |
| Surname-based Ethnicity Group Database (ETHNIC)                                | 1990–2016  | The ETHNIC database is a surname-based algorithm which classifies Ontario residents as either General Population, Chinese, or South Asian <sup>1</sup> .                                                                                                                                                                   |
| Registered Persons Database (RPDB)                                             | 1991–2017  | The RPDB dataset provides basic demographic information on all Ontario residents registered with provincial health coverage. Demographic variables in the RPDB include date of birth, death date, sex, and postal code (updated annually). Start and end dates of provincial health coverage enrollment are also provided. |
|                                                                                |            | The RPDB dataset was used to get an individual’s age (using date of birth) and sex. Neighborhood income quintile and residence location were derived from postal code information. Start and end dates for provincial health coverage (OHIP) and death date were used to determine eligibility.                            |
| Health services                                                                |            |                                                                                                                                                                                                                                                                                                                            |
| Discharge Abstract Database (DAD)                                              | 2002–2017  | The DAD dataset includes patient-level data for acute care hospitalizations. The data includes clinical details for each hospitalization such as clinical diagnosis (ICD-10) and health-related interventions (CCI).                                                                                                       |

|                                                            |           |                                                                                                                                                                                                                                                                                                                                                                                                                                                                                       |
|------------------------------------------------------------|-----------|---------------------------------------------------------------------------------------------------------------------------------------------------------------------------------------------------------------------------------------------------------------------------------------------------------------------------------------------------------------------------------------------------------------------------------------------------------------------------------------|
|                                                            |           | Data from DAD was used to capture urgent inpatient hospitalization episodes, Charlson comorbidities, and historic documentation of diseases. Data from DAD was also used to identify chemotherapy or radiotherapy that occurs in an inpatient setting.                                                                                                                                                                                                                                |
| National Ambulatory Care Reporting System Database (NACRS) | 2002–2017 | <p>The NACRS dataset includes visits to an emergency department in Ontario. The data includes details on clinical diagnosis (ICD-10) and health-related interventions (CCI).</p> <p>Data from NACRS was used to capture unscheduled emergency department visits. The NACRS dataset also contains cancer clinic visits, which were used to identify chemotherapy and radiotherapy use.</p>                                                                                             |
| Ontario Drug Benefit Claims Database (ODB)                 | 2005–2016 | <p>The ODB dataset includes dispensed medication claims among individuals enrolled in the ODB program in Ontario. All Ontario residents 65 and older are eligible for the ODB program.</p> <p>Data from the ODB was used to determine what proportion of individuals are active in the program (i.e. have more than one claim in the year prior), capture low-income seniors, as well as capture concurrent and historic medication use.</p>                                          |
| Ontario Health Insurance Plan Claims (OHIP)                | 1997–2017 | <p>The OHIP dataset includes physician billings to the province of Ontario among residents with provincial health coverage. Each billing includes a data element on the physician ID, the physician specialty, the patient ID, a diagnostic code (ICD-9), a fee code, and the service date.</p> <p>Data from the OHIP dataset was used to obtain variables for primary care visits, specialist visits, cancer screening, cancer treatment, comorbidities, and chronic conditions.</p> |
| Ontario Laboratories Information System (OLIS)             | 2007–2017 | <p>The OLIS dataset includes laboratory test results among tests being conducted in Ontario.</p> <p>The data was used to acquire a dataset of complete blood count (CBC) tests among Ontario residents in the accrual period. These CBC tests were used for exclusions and the exposure definition.</p>                                                                                                                                                                               |
| Same Day Surgery (SDS)                                     | 2002–2017 | <p>The SDS dataset contains patient-level information on same day surgeries, with a similar format to the DAD data.</p> <p>Data from the SDS data was used to assign Charlson comorbidities, chemotherapy and radiotherapy.</p>                                                                                                                                                                                                                                                       |
| <i>Registries</i>                                          |           |                                                                                                                                                                                                                                                                                                                                                                                                                                                                                       |
| Cancer Activity Level Reporting (ALR)                      | 2005–2017 | <p>The ALR dataset includes patient-level activity among cancer patients.</p> <p>The dataset was used to determine chemotherapy and radiotherapy treatment among eligible subjects.</p>                                                                                                                                                                                                                                                                                               |
| New Drug Funding Program (NDFP)                            | 2005–2017 | <p>The NDFP data contains dispensation records of new oncologic medications that are typically not funded under standard provincial health coverage.</p> <p>The dataset was used to determine chemotherapy and radiotherapy treatment among eligible subjects.</p>                                                                                                                                                                                                                    |
| Ontario Breast Screening Program (OBSP)                    | 2005–2016 | The OBSP data contains breast screening data among women enrolled in the OBSP program. The data was used to determine if a woman was up to date on her breast cancer screening.                                                                                                                                                                                                                                                                                                       |

|                                                   |           |                                                                                                                                                                                                                                                                                                                                                                                                                                                                                                      |
|---------------------------------------------------|-----------|------------------------------------------------------------------------------------------------------------------------------------------------------------------------------------------------------------------------------------------------------------------------------------------------------------------------------------------------------------------------------------------------------------------------------------------------------------------------------------------------------|
| Ontario Cancer Registry (OCR)                     | 1964–2016 | <p>The OCR dataset includes all reportable incident cancer diagnosis in Ontario between January 1964 and September 2019<sup>2</sup>. Each incident cancer diagnosis contains information on the cancer site/topology (ICD-10) and cancer morphology (ICD-O-3).</p> <p>The OCR data was used to create our inclusion cohort; individuals diagnosed with a cancer in the accrual period. The data was also used to capture cancer-specific variables such as cancer topology, histology and stage.</p> |
| <i>ICES derived cohorts</i>                       |           |                                                                                                                                                                                                                                                                                                                                                                                                                                                                                                      |
|                                                   |           | A population-level cohort of Ontario residents with asthma.                                                                                                                                                                                                                                                                                                                                                                                                                                          |
| Ontario Asthma Dataset (ASTHMA)                   | 1993–2016 | <p>A validated algorithm using DAD and OHIP data<sup>3</sup>:</p> <p>Sensitivity = 80.6%</p> <p>Specificity = 81.4%</p> <p>PPV = 72.5%</p> <p>NPV = 87.3%</p>                                                                                                                                                                                                                                                                                                                                        |
|                                                   |           | A population-level cohort of Ontario residents with congestive heart failure.                                                                                                                                                                                                                                                                                                                                                                                                                        |
| Congestive Heart Failure (CHF)                    | 1991–2016 | <p>A validated algorithm using DAD, NACRS and OHIP data<sup>4</sup>:</p> <p>Sensitivity = 84.8%</p> <p>Specificity = 97.0%</p> <p>PPV = 55.6%</p>                                                                                                                                                                                                                                                                                                                                                    |
| Chronic Obstructive Pulmonary Disease (COPD)      | 1991–2016 | <p>A population-level cohort of Ontario residents with chronic obstructive pulmonary disease.</p> <p>Validated algorithm using DAD and OHIP data<sup>5</sup>:</p> <p>Sensitivity = 85.0%</p> <p>Specificity = 78.4%</p>                                                                                                                                                                                                                                                                              |
| Ontario Dementia Database (DEMENTIA)              | 1996–2016 | <p>A population-level cohort of Ontario residents with dementia.</p> <p>Validated algorithm using DAD, SDS, ODB and OHIP data<sup>6</sup>:</p> <p>Sensitivity = 79.3%</p> <p>Specificity = 99.1%</p>                                                                                                                                                                                                                                                                                                 |
| Ontario HIV Database (HIV)                        | 1991–2016 | <p>A population-level cohort of Ontario residents with HIV.</p> <p>Validated algorithm using OHIP data<sup>7</sup>:</p> <p>Sensitivity = 96.2%</p> <p>Specificity = 99.6%</p>                                                                                                                                                                                                                                                                                                                        |
| Ontario Hypertension dataset (HYPER)              | 1991–2016 | <p>A population-level cohort of Ontario residents with hypertension.</p> <p>Validated algorithm using DAD and OHIP data<sup>8</sup>:</p> <p>Sensitivity = 72%</p> <p>Specificity = 95%</p> <p>PPV = 87%</p> <p>NPV = 88%</p>                                                                                                                                                                                                                                                                         |
| Ontario Mother-Baby Linked Dataset (MOMBABY)      | 1988–2016 | <p>The MOMBABY dataset includes infant deliveries in an inpatient setting beginning in 1988. The MOMBABY dataset was used to capture the number of previous infant deliveries and/or any recent infant deliveries (in the 2 years prior) among female individuals.</p>                                                                                                                                                                                                                               |
| Ontario Crohn's and Colitis Cohort Dataset (OCCC) | 1991–2016 | <p>A population-level cohort of Ontario residents with Crohn's and Colitis.</p> <p>Validated algorithm using DAD, NACRS and OHIP data<sup>9</sup>:</p> <p>Sensitivity = 59.3%</p>                                                                                                                                                                                                                                                                                                                    |

|                                                                                                                                                                                                               |           |                                                                                                                                                                        |
|---------------------------------------------------------------------------------------------------------------------------------------------------------------------------------------------------------------|-----------|------------------------------------------------------------------------------------------------------------------------------------------------------------------------|
|                                                                                                                                                                                                               |           | Specificity = 99.0%<br>PPV = 71.1%<br>NVP = 98.3%                                                                                                                      |
| A population-level cohort of Ontario residents with diabetes.                                                                                                                                                 |           |                                                                                                                                                                        |
| Ontario Diabetes Dataset (ODD)                                                                                                                                                                                | 1991–2016 | Validated algorithm using DAD and ODB data <sup>10</sup> :<br>Sensitivity = 90.0%<br>Specificity = 97.7%<br>PPV = 92.6%                                                |
| A population-level cohort of Ontario residents with rheumatoid arthritis.                                                                                                                                     |           |                                                                                                                                                                        |
| Ontario Rheumatoid Arthritis Dataset (ORAD)                                                                                                                                                                   | 1993–2016 | Validated algorithm using DAD and OHIP data <sup>11</sup> :<br>Sensitivity = 78%<br>Specificity = 100%<br>PPV = 78%<br>NVP = 100%                                      |
| <i>Other datasets</i>                                                                                                                                                                                         |           |                                                                                                                                                                        |
|                                                                                                                                                                                                               |           | The DIN dataset includes drug information unique by the drug DIN. Drug data includes drug name, drug class, strength, and route administered.                          |
| Drug List Dataset (DIN)                                                                                                                                                                                       | 1990–2020 | Unique drug name was used to determine the concurrent number of drugs being used. Drug class was used to identify historic use of drugs that affect platelet function. |
| ICD = International Classification of Disease; CCI = Canadian Classification of Health Interventions; PPV = Positive Predictive Value; NPV = Negative Predictive Value; ODB = Ontario Drug Benefits Database. |           |                                                                                                                                                                        |

**Table S2.** Definitions of site-specific cancer events.

| Definition                       | Sub-definition               | Data source(s) | Code type | Codes                                                                                                                                                                                                                                                     | Conditions/Notes                                                                                                                                         |
|----------------------------------|------------------------------|----------------|-----------|-----------------------------------------------------------------------------------------------------------------------------------------------------------------------------------------------------------------------------------------------------------|----------------------------------------------------------------------------------------------------------------------------------------------------------|
| <i>Incident cancer diagnosis</i> | Any malignant neoplasm       | OCR            | ICD-10    | C00-C97                                                                                                                                                                                                                                                   |                                                                                                                                                          |
|                                  | Any primary solid tumour     | OCR            | ICD-10    | C00-C97                                                                                                                                                                                                                                                   |                                                                                                                                                          |
| <i>Malignant solid tumour **</i> | Colon                        | OCR            | ICD-10    | C18 – Colon<br>C19 – Rectosigmoid junction<br>C20 – Rectum                                                                                                                                                                                                |                                                                                                                                                          |
|                                  | Lung                         | OCR            | ICD-10    | C34 – Bronchus or lung                                                                                                                                                                                                                                    |                                                                                                                                                          |
|                                  | Breast                       | OCR            | ICD-10    | C50 – Breast                                                                                                                                                                                                                                              | Female sex                                                                                                                                               |
|                                  | Ovary                        | OCR            | ICD-10    | C56 – Ovary<br>C570 – Fallopian tube                                                                                                                                                                                                                      | Female sex                                                                                                                                               |
|                                  | Cervical                     | OCR            | ICD-10    | C53 – Cervix                                                                                                                                                                                                                                              | Female sex                                                                                                                                               |
|                                  | Endometrium                  | OCR            | ICD-10    | C54 – Corpus uteri                                                                                                                                                                                                                                        | Female sex                                                                                                                                               |
|                                  | Prostate                     | OCR            | ICD-10    | C61 – Prostate                                                                                                                                                                                                                                            | Male sex                                                                                                                                                 |
|                                  | Testicle                     | OCR            | ICD-10    | C62 – Testis                                                                                                                                                                                                                                              | Male sex                                                                                                                                                 |
|                                  | Thyroid                      | OCR            | ICD-10    | C73 – Thyroid gland                                                                                                                                                                                                                                       |                                                                                                                                                          |
|                                  | Pancreas                     | OCR            | ICD-10    | C25 – Pancreas                                                                                                                                                                                                                                            |                                                                                                                                                          |
|                                  | Stomach                      | OCR            | ICD-10    | C16 – Stomach                                                                                                                                                                                                                                             |                                                                                                                                                          |
|                                  | Kidney                       | OCR            | ICD-10    | C64 – Kidney<br>C65 – Renal Pelvis                                                                                                                                                                                                                        |                                                                                                                                                          |
|                                  | Bladder                      | OCR            | ICD-10    | C67 – Bladder                                                                                                                                                                                                                                             |                                                                                                                                                          |
|                                  | Liver                        | OCR            | ICD-10    | C22 – Liver and intrahepatic bile ducts                                                                                                                                                                                                                   |                                                                                                                                                          |
|                                  | Esophagus                    | OCR            | ICD-10    | C15 – Esophagus                                                                                                                                                                                                                                           |                                                                                                                                                          |
|                                  | Other gastrointestinal tract | OCR            | ICD-10    | C17 – Small intestine<br>C21 – Anus and anal canal<br>C23 – Gallbladder                                                                                                                                                                                   |                                                                                                                                                          |
|                                  | Brain                        | OCR            | ICD-10    | C71 – Brain                                                                                                                                                                                                                                               |                                                                                                                                                          |
|                                  | Melanoma                     | OCR            | ICD-10    | C00-C97, <b>and one of</b><br>8720/3 – Malignant Melanoma, NOS<br>8743/3 – Superficial Spreading Melanoma<br>8721/3 – Nodular Melanoma<br>8742/3 – Lentigo Maligna Melanoma<br>8744/3 – Acral Lentiginous Melanoma<br>8772/3 – Spindle Cell Melanoma, NOS | Note: All ICD-O-3 melanoma codes were derived from the cancer registry and are in order from most frequent to least frequent among melanoma pathologies. |
|                                  |                              |                | ICD-O-3   |                                                                                                                                                                                                                                                           |                                                                                                                                                          |

8745/3 – Desmoplastic Melanoma  
8770/3 – Mixed Epithelioid and Spindle Cell Melanoma  
8771/3 – Epithelioid Cell Melanoma  
8730/3 – Amelanotic Melanoma  
8723/3 – Malignant Melanoma, Regressing  
8774/3 – Spindle Cell Melanoma, Type B  
8761/3 – Malignant Melanoma in a Giant Pigmented Nevus  
8740/3 – Malignant Melanoma in Junctional Nevus  
8722/3 – Balloon Cell Melanoma  
8773/3 – Spindle Cell Melanoma, type A  
8746/3 – Mucosal Lentiginous Melanoma  
8741/3 – Malignant Melanoma in Precancerous Melanosis

|                    |     |        |                                                  |                                                                                                      |
|--------------------|-----|--------|--------------------------------------------------|------------------------------------------------------------------------------------------------------|
| Head and neck      | OCR | ICD-10 | C00-C09 – Lip, oral cavity                       |                                                                                                      |
|                    |     |        | C10 – Oropharynx                                 |                                                                                                      |
|                    |     |        | C11 – Nasopharynx                                |                                                                                                      |
|                    |     |        | C13 – Hypopharynx                                |                                                                                                      |
|                    |     |        | C12 – Piriform sinus                             |                                                                                                      |
|                    |     |        | C14 – Lip, oral cavity and pharynx (ill-defined) |                                                                                                      |
|                    |     |        | C30 – Nasal cavity and middle ear                |                                                                                                      |
|                    |     |        | C31 – Accessory sinuses                          |                                                                                                      |
|                    |     |        | C32 – Larynx                                     |                                                                                                      |
| Other solid tumour | OCR | ICD-10 | C00-C97                                          | Cancer event met solid tumour definition, but none of the site-specific definitions described above. |

\*\* Solid tumours are morphologic codes that are not in hematological, lymphoid and related tissue definitions.

Table S3. Definitions of descriptive and treatment variables.

| Variable Class                     | Definition              | Data source(s) | Code type      | Codes                                                                                                                                                                                                                                                                                                                                                                                                                                                                                                                                                                                                                                                                                                                                                                                                                                                                                                                                                                                                                                                                                                                                                                                                                                                                                                                                                                                                                         | Conditions/Notes                                                                                                                                                                                            |
|------------------------------------|-------------------------|----------------|----------------|-------------------------------------------------------------------------------------------------------------------------------------------------------------------------------------------------------------------------------------------------------------------------------------------------------------------------------------------------------------------------------------------------------------------------------------------------------------------------------------------------------------------------------------------------------------------------------------------------------------------------------------------------------------------------------------------------------------------------------------------------------------------------------------------------------------------------------------------------------------------------------------------------------------------------------------------------------------------------------------------------------------------------------------------------------------------------------------------------------------------------------------------------------------------------------------------------------------------------------------------------------------------------------------------------------------------------------------------------------------------------------------------------------------------------------|-------------------------------------------------------------------------------------------------------------------------------------------------------------------------------------------------------------|
| <i>Health services utilization</i> | Core primary care visit | OHIP           | Fee code       | A001 - MINOR ASSESS.-F.P./G.P.<br>A002 - Family Practice & Practice in General - Enhanced 18 month well baby visit<br>A003 - GEN. ASSESS. -F.P./G.P.<br>A004 - GEN.RE-ASSESS-F.P./G.P.<br>A005 - CONSULTATION -F.P./G.P.<br>A007 - INTERMED.ASSESS/WELL BABY CARE-F.P./G.P./PAED.<br>A008 - MINI ASSESSMENT-F.P./G.P.<br>A903 - GEN/FAM PRACT-PRE-DENTAL/OPER.ASSESS LIMIT 2 PER YEAR/PT<br>E075 - GERIATRIC GENERAL ASSESSMENT PREMIUM<br>G212 - D./T. PROC.-ALLERGY-HYPOSENSITIZATION INJECTION PLUS BASIC<br>G271 - D./T. PROC.-CARDIOV.-ANTICOAGULANT SUPERVISION<br>G372 - D./T. PROC.-INJECTIONS-INTRADERMAL/MUSCULAR ETC. EA. ADD.<br>G373 - D./T. PROC.-INJ. INTRADERMAL/MUSC. BASIC FEE (SHICK TEST)<br>G365 - D./T. PROC.-GYNAECOLOGY-PAPANICOLAOU SMEAR<br>G538 - D&T IMMUNIZATION-WITH VISIT, EACH INJECT.<br>G539 - Injection of unspecified agent - sole reason (first injection)<br>G590 - INFLUENZA AGENT +VISIT<br>G591 - Injection of influenza agent - sole reason<br>K005 - INDIVIDUAL CARE PER 1/2 HR<br>K013 - COUNSELLING-ONE OR MORE PEOPLE-PER 1/2HR.<br>K017 - ANNUAL HEALTH EXAM-CHILD AFT. 2ND BIRTHDAY.<br>P004 - OBS.-PRENATAL CARE-MINOR PRENATAL ASSESS.-SUB-SEQ.PRENAT.VIS.<br>K130 - Periodic health visit - adolescent<br>K131 - Periodic health visit - adult aged 18 to 64 inclusive<br>K132 - Periodic health visit - adult 65 years of age and older<br>K030 - DIABETIC MANAGEMENT FEE | Note: All core primary care visits were restricted to OHIP billings from primary care providers (GP and community medicine specialties). A maximum of one core visit per patient-day-physician was counted. |
|                                    |                         |                |                | 02 – Dermatologist<br>03 – General surgeon<br>06 – Orthopedic surgeon                                                                                                                                                                                                                                                                                                                                                                                                                                                                                                                                                                                                                                                                                                                                                                                                                                                                                                                                                                                                                                                                                                                                                                                                                                                                                                                                                         |                                                                                                                                                                                                             |
| Specialist visit                   |                         | OHIP           | Specialty code |                                                                                                                                                                                                                                                                                                                                                                                                                                                                                                                                                                                                                                                                                                                                                                                                                                                                                                                                                                                                                                                                                                                                                                                                                                                                                                                                                                                                                               |                                                                                                                                                                                                             |

|                        |      |          |                                                                                                                                                                                                                                                                                                                  |
|------------------------|------|----------|------------------------------------------------------------------------------------------------------------------------------------------------------------------------------------------------------------------------------------------------------------------------------------------------------------------|
|                        |      |          | 07 – Geriatrician                                                                                                                                                                                                                                                                                                |
|                        |      |          | 13 – Internal medicine specialist                                                                                                                                                                                                                                                                                |
|                        |      |          | 15 – Endocrinologist                                                                                                                                                                                                                                                                                             |
|                        |      |          | 16 – Nephrologist                                                                                                                                                                                                                                                                                                |
|                        |      |          | 18 – Neurologist                                                                                                                                                                                                                                                                                                 |
|                        |      |          | 19 – Psychiatrist                                                                                                                                                                                                                                                                                                |
|                        |      |          | 20 – OBGYN                                                                                                                                                                                                                                                                                                       |
|                        |      |          | 22 – Geneticist                                                                                                                                                                                                                                                                                                  |
|                        |      |          | 24 – ENT                                                                                                                                                                                                                                                                                                         |
|                        |      |          | 35 – Urologist                                                                                                                                                                                                                                                                                                   |
|                        |      |          | 41 – Gastroenterologist                                                                                                                                                                                                                                                                                          |
|                        |      |          | 44 – Oncologist                                                                                                                                                                                                                                                                                                  |
|                        |      |          | 47 – Respiriologist                                                                                                                                                                                                                                                                                              |
|                        |      |          | 48 – Rheumatologist                                                                                                                                                                                                                                                                                              |
|                        |      |          | 60 – Cardiologist                                                                                                                                                                                                                                                                                                |
|                        |      |          | 61 – Hematologist                                                                                                                                                                                                                                                                                                |
| Breast cancer screen   | OHIP | Fee code | X172 – Mammogram - No Signs or Symptoms - unilateral<br>X178 – Mammogram - No Signs or Symptoms - bilateral<br>X185 – DIAGNOSTIC RADIOLOGY-MAMMOGRAM-BILATERAL                                                                                                                                                   |
|                        | OBSP |          | Screened variable in (“2” “3”)                                                                                                                                                                                                                                                                                   |
|                        |      |          | E430 – D/T PROC-PAP SMEAR PERFORMED OUTSIDE OF HOSP-<br>ADD                                                                                                                                                                                                                                                      |
|                        |      |          | G365 – D./T. PROC.-GYNAECOLOGY-PAPANICOLAOU SMEAR                                                                                                                                                                                                                                                                |
|                        |      |          | E431 – when papanicolaou smear is performed outside of hospital, to<br>G394                                                                                                                                                                                                                                      |
| Cervical cancer screen | OHIP | Fee code | G394 – ADD’L PAP SMEAR FOR FOLLOWUP OF ABNORM OR IN-<br>ADEQ SMEARS<br>L713 – LAB.MED.-ANAT PATH,HIST,CYT-CYTOL-GYNAECOLOGICAL SPECIMEN<br>L733 – CERVICOVAGINAL SPECIMEN (MONOLAYER CELL METHODOLOGY)<br>L812 – LAB MED.CYTOLOGY-CERVICOVAG SPEC<br>Q678 – GYNAECOLOGY - PAPANICOLAOU SMEAR- PERIODIC -<br>N.P. |
| Colon cancer screen    |      |          | G004 – D./T. PROC-LAB.MED.-OCCULT.BLOOD.<br>L181 – LAB. MED.-BIOCHEM.-OCCULT BLOOD<br>L179 – TRACKING CODE-COLON CANCER CHECK<br>Q152 – FOBT COMPLETION FEE                                                                                                                                                      |



|                         |              |      |          |                                                                                                                                                                                       |
|-------------------------|--------------|------|----------|---------------------------------------------------------------------------------------------------------------------------------------------------------------------------------------|
|                         |              |      |          | Q043 – NEW PATIENT FEE FOBT POSITIVE/CRC INCREASED RISK                                                                                                                               |
|                         |              |      |          | Z535 – INTESTINES-ENDOSCOPY-SIGMOIDOSCOPY W/WITHOUT ANOSCOPY                                                                                                                          |
|                         |              |      |          | Z555 – INTESTINES-ENDOSCOPY-COLONOSCOPY INTO DESCENDING COLON                                                                                                                         |
|                         |              |      |          | Z580 – INTESTINE-ENDOSCOPY-USING 60C.M. FLEXIBLE ENDOSCOPE.                                                                                                                           |
|                         |              |      |          | E740 – INTESTINE ENDO SIGMOID TO SPLENIC FLEXURE ADD                                                                                                                                  |
|                         |              |      |          | E741 – INTESTINE END SIGMOID TO HEPATIC FLEXURE ADD                                                                                                                                   |
|                         |              |      |          | E747 – INTESTINE-ENDOSCOPY-SIGMOID.TO CAECUM ADD TO Z512/Z555                                                                                                                         |
|                         |              |      |          | E705 – DIGEST.SYST.INTEST.ENDOSC.INTO TERMINAL ILEUM,ADD.                                                                                                                             |
|                         |              |      |          | Z492 – Five year follow up of normal colonoscopy Z499, absence of intervening signs or symptoms                                                                                       |
|                         |              |      |          | Z493 – Ten year follow up of normal colonoscopy (Z497), absence of intervening signs or symptoms                                                                                      |
|                         |              |      |          | Z497 – Confirmatory colonoscopy - sigmoid to descending colon                                                                                                                         |
|                         |              |      |          | Z498 – Surveillance colonoscopy - sigmoid to descending colon                                                                                                                         |
|                         |              |      |          | Z499 – Colonoscopy - Absence of signs or symptoms, family history of colon cancer in a first degree relative                                                                          |
|                         |              |      |          | G261 – D./T. PROC.INJ/INF-INTRAIVEN-CHEMOTHERAPY-EA.ADD.INJ.TO G381                                                                                                                   |
|                         |              |      |          | G339 – Chemotherapy - Single agent intravenous chemotherapy i.e. doxorubicin, daunorubicin, epirubicin, mitoxintrone, cisplatin or bleomycin (greater than 10 units per metre square) |
|                         |              |      |          | G345 – D&T MULT.AGENTS CHEMOTHER.GREATER THAN 10 UNITS PER MET.SQ.                                                                                                                    |
|                         |              |      |          | G359 – D&T SING.AGENT CHEMOTHER.(GREATER THAN 2G/M2 OR 1G/M2.)                                                                                                                        |
|                         |              |      |          | G381 – D./T. PROC. INJECT/INFUS. INTRAVENOUS CHEMOTHERAPY-1ST INJ                                                                                                                     |
|                         |              |      |          | G382 – D./T. PROC.-INJ./INFUSION-SUPERVISION CHEMOTHERAPY BY PHONE                                                                                                                    |
|                         |              |      |          | G388 – Management of special oral chemotherapy, for malignant disease                                                                                                                 |
| <i>Cancer treatment</i> | Chemotherapy | OHIP | Fee code |                                                                                                                                                                                       |

|                     |      |          |                                                                     |  |  |
|---------------------|------|----------|---------------------------------------------------------------------|--|--|
| DAD/SDS/NACRSICD-10 |      |          | Z511 – Chemotherapy session for neoplasm                            |  |  |
| NDFP                |      |          | Z512 – Other chemotherapy                                           |  |  |
| ALR (systemic)      |      |          | Any treatment records                                               |  |  |
|                     |      |          | Any treatment records                                               |  |  |
|                     |      |          | <i>External beam radiotherapy</i>                                   |  |  |
|                     |      |          | X302 – THERA. RADIOL.-TELERADIOOTHERAPY-X-RAY,RADIUM,COBALT ETC.    |  |  |
|                     |      |          | X304 – THERA. RADIOL.-TELERADIOOTHERAPY-MINOR                       |  |  |
|                     |      |          | X310 – TREATMENT PLANNING LEVEL 1                                   |  |  |
|                     |      |          | X311 – TREATMENT PLANNING LEVEL 2                                   |  |  |
|                     |      |          | X312 – TREATMENT PLANNING LEVEL 3                                   |  |  |
|                     |      |          | X313 – TREATMENT PLANNING LEVEL 4                                   |  |  |
|                     |      |          | <i>Brachytherapy</i>                                                |  |  |
|                     |      |          | X305 – THER.RADIOL.INTRACAVITORY CONTACT X-RAY THERAPY 1ST APPLIC.  |  |  |
|                     |      |          | X306 – THER.RADIOL.INTRACAVITORY CONTACT X-RAY THERAPY REP.APPLIC.  |  |  |
| Radiotherapy        | OHIP | Fee code | X322 – THERA. RADIOL.-RADIUM-SEALED SOURCE-TREAT. PLANNING          |  |  |
|                     |      |          | X323 – THERAP.RAD.-RADIUM-SEALED SOURCE-INTRACAVITARY-1ST APPL.     |  |  |
|                     |      |          | X324 – THERA. RADIOL.-RADIUM-SEALED SOURCE-INTERSTITIAL APPLICATION |  |  |
|                     |      |          | X325 – THERA. RADIOL.-RADIUM-SEALED SOURCE-PLAQUE,MOULD             |  |  |
|                     |      |          | X326 – THERA.RADIOL.-RADIOISOTOPES NON SEALED SOURCE-THYROID CA.    |  |  |
|                     |      |          | X329 – THERA.RADIOL.-RADIOISOTOPES-METASTA.CA BONE-NON SEALED SOURC |  |  |
|                     |      |          | X330 – THERAP.RAD.RADIOISOTOPES-ASCITES/PLEURAL EFFUSIONNOSEALSOURC |  |  |
|                     |      |          | X336 – THERAPEU.RADIOL.-RADIOISOTOPES-PROSTATE MALIGNANCY           |  |  |
|                     |      |          |                                                                     |  |  |
|                     |      |          |                                                                     |  |  |

|                             |                                          | <div> <div>External beam radiotherapy</div> <div>substring position 4 length 2 = "27"</div> </div> <div> <div>Brachytherapy</div> <div>substring position 4 length 2 = "26"</div> </div> |                                                                                                                                                                                                                                                                                                                                                      |
|-----------------------------|------------------------------------------|------------------------------------------------------------------------------------------------------------------------------------------------------------------------------------------|------------------------------------------------------------------------------------------------------------------------------------------------------------------------------------------------------------------------------------------------------------------------------------------------------------------------------------------------------|
| DAD/SDS/NACRS               |                                          | Inter-<br>ven-<br>tion<br>code                                                                                                                                                           |                                                                                                                                                                                                                                                                                                                                                      |
| ALR (radiation)             |                                          | Any treatment records                                                                                                                                                                    |                                                                                                                                                                                                                                                                                                                                                      |
| Chronic<br>condi-<br>tions* | Osteoar-<br>thritis                      | OHIP                                                                                                                                                                                     | ICD-9 715, 274, 710, 711, 716, 718, 720, 727, 728, 729, 739                                                                                                                                                                                                                                                                                          |
|                             |                                          |                                                                                                                                                                                          | M15, M16, M17, M18, M19                                                                                                                                                                                                                                                                                                                              |
|                             |                                          | DAD/SDS                                                                                                                                                                                  | ICD-10 M00, M01, M02, M03, M07, M10, M11, M12, M13, M14, M20, M21, M22, M23, M24, M25, M30, M31, M32, M33, M34, M35, M36, M65, M66, M67, M68, M69, M7                                                                                                                                                                                                |
|                             | Cardiac<br>Arrhyth-<br>mia               | OHIP                                                                                                                                                                                     | ICD-9 427                                                                                                                                                                                                                                                                                                                                            |
|                             |                                          | DAD/SDS                                                                                                                                                                                  | ICD-10 I480, I481                                                                                                                                                                                                                                                                                                                                    |
|                             | Mood dis-<br>orders                      | OHIP                                                                                                                                                                                     | ICD-9 296, 300, 309, 311                                                                                                                                                                                                                                                                                                                             |
|                             |                                          | DAD/SDS                                                                                                                                                                                  | ICD-10 F30, F31, F32, F33, F341, F348, F349, F38, F39, F40, F41, F42, F431, F432, F438, F44, F450, F451, F452, F48, F530, F680, F930, F99                                                                                                                                                                                                            |
|                             | Other<br>mental<br>health dis-<br>orders | OHIP                                                                                                                                                                                     | ICD-9 291, 292, 295, 297, 298, 299, 301, 302, 303, 304, 305, 306, 307, 313, 314, 315, 319                                                                                                                                                                                                                                                            |
|                             |                                          | DAD/SDS                                                                                                                                                                                  | ICD-10 F1, F2, F04, F050, F058, F059, F060, F061, F062, F063, F064, F07, F08, F340, F35, F36, F37, F430, F439, F453, F454, F458, F46, F47, F49, F50, F51, F52, F531, F538, F539, F54, F55, F56, F57, F58, F59, F60, F61, F62, F63, F64, F65, F66, F67, F681, F688, F69, F7, F8, F90, F91, F92, F931, F932, F933, F938, F939, F94, F95, F96, F97, F98 |
|                             | Osteoporo-<br>sis                        | OHIP                                                                                                                                                                                     | ICD-9 733                                                                                                                                                                                                                                                                                                                                            |
|                             |                                          | DAD/SDS                                                                                                                                                                                  | ICD-10 M81, M82                                                                                                                                                                                                                                                                                                                                      |
|                             | Renal dis-<br>ease                       | OHIP                                                                                                                                                                                     | ICD-9 403, 404, 584, 585, 586, 451                                                                                                                                                                                                                                                                                                                   |
|                             |                                          | DAD/SDS                                                                                                                                                                                  | ICD-10 N17, N18, N19, T824, Z492, Z992                                                                                                                                                                                                                                                                                                               |
|                             | Stroke                                   | OHIP                                                                                                                                                                                     | ICD-9 430, 431, 432, 434, 436                                                                                                                                                                                                                                                                                                                        |
|                             |                                          | DAD/SDS                                                                                                                                                                                  | ICD-10 I60, I61, I62, I63, I64                                                                                                                                                                                                                                                                                                                       |

|                             |         |        |                         |
|-----------------------------|---------|--------|-------------------------|
| Chronic coronary disease    | OHIP    | ICD-9  | 411, 412, 413, 414      |
|                             | DAD/SDS | ICD-10 | I20, I22, I23, I24, I25 |
| Acute myocardial infarction | DAD/SDS | ICD-10 | I21                     |

\* All chronic conditions were obtained from validated diagnostic codes<sup>12</sup>. Definitions were defined based on either: 1) minimum of 3 OHIP claims, each claim greater than 30 days apart and less than 2 years apart, or 2) minimum of one inpatient hospitalization with any of the diagnostic codes.

**Table S4.** Definitions of cancer-specific death.

| Definition  | Data source(s) | Code type | Codes                                                                                                                                                                                                                                                                                                                                                                                                                                                                                                         |
|-------------|----------------|-----------|---------------------------------------------------------------------------------------------------------------------------------------------------------------------------------------------------------------------------------------------------------------------------------------------------------------------------------------------------------------------------------------------------------------------------------------------------------------------------------------------------------------|
| Colon       | ORGD           | ICD-9     | 153 – Malignant neoplasm of colon<br>154 – Malignant neoplasm of rectum rectosigmoid junction and anus<br>159 – Malignant neoplasm of other and ill-defined sites within the digestive organs and peritoneum<br>197 – Secondary malignant neoplasm of respiratory and digestive systems<br>198 – Secondary malignant neoplasm of other specified sites<br>199 – Malignant neoplasm without specification of site                                                                                              |
| Lung        | ORGD           | ICD-9     | 162 – Malignant neoplasm of trachea bronchus and lung<br>197 – Secondary malignant neoplasm of respiratory and digestive systems<br>198 – Secondary malignant neoplasm of other specified sites<br>199 – Malignant neoplasm without specification of site                                                                                                                                                                                                                                                     |
| Breast      | ORGD           | ICD-9     | 174 – Malignant neoplasm of female breast<br>197 – Secondary malignant neoplasm of respiratory and digestive systems<br>198 – Secondary malignant neoplasm of other specified sites<br>199 – Malignant neoplasm without specification of site                                                                                                                                                                                                                                                                 |
| Ovary       | ORGD           | ICD-9     | 183 – Malignant neoplasm of ovary and other uterine adnexa<br>184 – Malignant neoplasm of other and unspecified female genital organs<br>158 – Malignant neoplasm of retroperitoneum and peritoneum<br>159 – Malignant neoplasm of other and ill-defined sites within the digestive organs and peritoneum<br>197 – Secondary malignant neoplasm of respiratory and digestive systems<br>198 – Secondary malignant neoplasm of other specified sites<br>199 – Malignant neoplasm without specification of site |
| Cervical    | ORGD           | ICD-9     | 180 – Malignant neoplasm of cervix uteri<br>179 – Malignant neoplasm of uterus, part unspecified<br>184 – Malignant neoplasm of other and unspecified female genital organs<br>197 – Secondary malignant neoplasm of respiratory and digestive systems<br>198 – Secondary malignant neoplasm of other specified sites<br>199 – Malignant neoplasm without specification of site                                                                                                                               |
| Endometrium | ORGD           | ICD-9     | 182 – Malignant neoplasm of body of uterus                                                                                                                                                                                                                                                                                                                                                                                                                                                                    |

|           |      |       |                                                                                                                                                                                                                                                                                                                                                                                                                                                          |
|-----------|------|-------|----------------------------------------------------------------------------------------------------------------------------------------------------------------------------------------------------------------------------------------------------------------------------------------------------------------------------------------------------------------------------------------------------------------------------------------------------------|
|           |      |       | 179 – Malignant neoplasm of uterus, part unspecified<br>197 – Secondary malignant neoplasm of respiratory and digestive systems<br>198 – Secondary malignant neoplasm of other specified sites<br>199 – Malignant neoplasm without specification of site                                                                                                                                                                                                 |
| Prostate  | ORGD | ICD-9 | 185 – Malignant neoplasm of prostate<br>197 – Secondary malignant neoplasm of respiratory and digestive systems<br>198 – Secondary malignant neoplasm of other specified sites<br>199 – Malignant neoplasm without specification of site                                                                                                                                                                                                                 |
| Testicle  | ORGD | ICD-9 | 186 – Malignant neoplasm of testis<br>197 – Secondary malignant neoplasm of respiratory and digestive systems<br>198 – Secondary malignant neoplasm of other specified sites<br>199 – Malignant neoplasm without specification of site                                                                                                                                                                                                                   |
| Thyroid   | ORGD | ICD-9 | 193 – Malignant neoplasm of thyroid gland<br>197 – Secondary malignant neoplasm of respiratory and digestive systems<br>198 – Secondary malignant neoplasm of other specified sites<br>199 – Malignant neoplasm without specification of site                                                                                                                                                                                                            |
| Pancreas  | ORGD | ICD-9 | 157 – Malignant neoplasm of pancreas<br>159 – Malignant neoplasm of other and ill-defined sites within the digestive organs and peritoneum<br>197 – Secondary malignant neoplasm of respiratory and digestive systems<br>198 – Secondary malignant neoplasm of other specified sites<br>199 – Malignant neoplasm without specification of site                                                                                                           |
| Stomach   | ORGD | ICD-9 | 151 – Malignant neoplasm of stomach<br>150 – Malignant neoplasm of esophagus<br>152 – Malignant neoplasm of small intestine including duodenum<br>159 – Malignant neoplasm of other and ill-defined sites within the digestive organs and peritoneum<br>197 – Secondary malignant neoplasm of respiratory and digestive systems<br>198 – Secondary malignant neoplasm of other specified sites<br>199 – Malignant neoplasm without specification of site |
| Kidney    | ORGD | ICD-9 | 189 – Malignant neoplasm of kidney and other and unspecified urinary organs<br>197 – Secondary malignant neoplasm of respiratory and digestive systems<br>198 – Secondary malignant neoplasm of other specified sites<br>199 – Malignant neoplasm without specification of site                                                                                                                                                                          |
| Bladder   | ORGD | ICD-9 | 188 – Malignant neoplasm of bladder<br>189 – Malignant neoplasm of kidney and other and unspecified urinary organs<br>197 – Secondary malignant neoplasm of respiratory and digestive systems<br>198 – Secondary malignant neoplasm of other specified sites<br>199 – Malignant neoplasm without specification of site                                                                                                                                   |
| Esophagus | ORGD | ICD-9 | 150 – Malignant neoplasm of esophagus<br>151 – Malignant neoplasm of stomach<br>197 – Secondary malignant neoplasm of respiratory and digestive systems<br>198 – Secondary malignant neoplasm of other specified sites<br>199 – Malignant neoplasm without specification of site                                                                                                                                                                         |

|                              |      |       |                                                                                                    |
|------------------------------|------|-------|----------------------------------------------------------------------------------------------------|
| Other gastrointestinal tract | ORGD | ICD-9 | 150 – Malignant neoplasm of esophagus                                                              |
|                              |      |       | 151 – Malignant neoplasm of stomach                                                                |
|                              |      |       | 152 – Malignant neoplasm of small intestine including duodenum                                     |
|                              |      |       | 153 – Malignant neoplasm of colon                                                                  |
|                              |      |       | 154 – Malignant neoplasm of rectum rectosigmoid junction and anus                                  |
|                              |      |       | 156 – Malignant neoplasm of gallbladder and extrahepatic bile ducts                                |
|                              |      |       | 157 – Malignant neoplasm of pancreas                                                               |
|                              |      |       | 158 – Malignant neoplasm of retroperitoneum and peritoneum                                         |
|                              |      |       | 159 – Malignant neoplasm of other and ill-defined sites within the digestive organs and peritoneum |
|                              |      |       | 197 – Secondary malignant neoplasm of respiratory and digestive systems                            |
| Brain                        | ORGD | ICD-9 | 198 – Secondary malignant neoplasm of other specified sites                                        |
|                              |      |       | 199 – Malignant neoplasm without specification of site                                             |
|                              |      |       | 191 – Malignant neoplasm of brain                                                                  |
|                              |      |       | 197 – Secondary malignant neoplasm of respiratory and digestive systems                            |
|                              |      |       | 237 – Neoplasm of uncertain behavior of endocrine glands and nervous system                        |
|                              |      |       | 198 – Secondary malignant neoplasm of other specified sites                                        |
|                              |      |       | 199 – Malignant neoplasm without specification of site                                             |
|                              |      |       | 172 – Malignant melanoma of skin                                                                   |
|                              |      |       | 173 – Oth and unspec malignant neoplasm of skin                                                    |
|                              |      |       | 197 – Secondary malignant neoplasm of respiratory and digestive systems                            |
| Melanoma                     | ORGD | ICD-9 | 198 – Secondary malignant neoplasm of other specified sites                                        |
|                              |      |       | 199 – Malignant neoplasm without specification of site                                             |
|                              |      |       | 14 – Malignant Neoplasm of Lip, Oral Cavity, and Pharynx                                           |
|                              |      |       | 176 – Kaposi's sarcoma                                                                             |
|                              |      |       | 197 – Secondary malignant neoplasm of respiratory and digestive systems                            |
|                              |      |       | 198 – Secondary malignant neoplasm of other specified sites                                        |
|                              |      |       | 199 – Malignant neoplasm without specification of site                                             |
|                              |      |       | 14 – Malignant Neoplasm of Lip, Oral Cavity, and Pharynx                                           |
|                              |      |       | 150 – Malignant neoplasm of esophagus                                                              |
|                              |      |       | 151 – Malignant neoplasm of stomach                                                                |
| Head and neck                | ORGD | ICD-9 | 152 – Malignant neoplasm of small intestine including duodenum                                     |
|                              |      |       | 153 – Malignant neoplasm of colon                                                                  |
|                              |      |       | 154 – Malignant neoplasm of rectum rectosigmoid junction and anus                                  |
|                              |      |       | 156 – Malignant neoplasm of gallbladder and extrahepatic bile ducts                                |
|                              |      |       | 157 – Malignant neoplasm of pancreas                                                               |
|                              |      |       | 158 – Malignant neoplasm of retroperitoneum and peritoneum                                         |
|                              |      |       | 159 – Malignant neoplasm of other and ill-defined sites within the digestive organs and peritoneum |
|                              |      |       | 16 – Malignant Neoplasm of Respiratory and Intrathoracic Organs                                    |
|                              |      |       | 17 – Malignant Neoplasm of Bone, Connective Tissue, Skin, and Breast                               |
|                              |      |       | 18 – Malignant Neoplasm of Genitourinary Organs                                                    |
| Other solid tumour           | ORGD | ICD-9 | 19 – Malignant Neoplasm of Other and Unspecified Sites                                             |

**Table S5.** Inclusion table for cancer subjects.

|                                                           | <b>Frequency</b> | <b>Percent</b> |
|-----------------------------------------------------------|------------------|----------------|
| <i>Total incident cancers diagnosis in accrual period</i> | 673,834          |                |
| <b>Exclusion</b>                                          |                  |                |
| 1. Missing topology information                           | 7                | 0.00           |
| 2. Incident liver cancer                                  | 9,756            | 1.45           |
| 3. Incident hematological cancer                          | 81,379           | 12.08          |
| 4. No baseline platelet value                             | 449,104          | 66.65          |
| <b>Eligible cancer diagnosis for inclusion cohort</b>     | <b>133,588</b>   | <b>19.83</b>   |

**Table S6.** Exclusion table for study cohort.

|                                                                                                  | <b>Frequency</b> | <b>Percent</b> |
|--------------------------------------------------------------------------------------------------|------------------|----------------|
| <i>Total incident cancers meeting inclusion criteria</i>                                         | 133,588          |                |
| <b>Exclusion</b>                                                                                 |                  |                |
| 1. Missing date of birth                                                                         | ≤ 5              | 0              |
| 2. Missing sex                                                                                   | ≤ 5              | 0              |
| 3. Age <18 on index date                                                                         | 441              | 0.33           |
| 4. Age >100 on index date                                                                        | 73               | 0.05           |
| 5. Death date prior to/on index date                                                             | 1,918            | 1.44           |
| 6. OHIP ineligible on index date                                                                 | 126              | 0.09           |
| 7. History of cancer in the OCR prior to index date                                              | 12,390           | 9.27           |
| 8. History of cancer therapy (chemotherapy or radiotherapy) in the two years prior to index date | 5,014            | 3.75           |
| 9. Multiple primary cancers on index date                                                        | 1,394            | 1.04           |
| <b>Eligible cancer subjects</b>                                                                  | <b>112,231</b>   | <b>84.01</b>   |

**Table S7.** Descriptive table of cancer patients (meeting all exclusion criteria) with versus without a baseline platelet count.

| Description                       | Value                        | Total            | Baseline CBC     | No baseline CBC  | Standardized Difference |
|-----------------------------------|------------------------------|------------------|------------------|------------------|-------------------------|
| <i>Overall</i>                    |                              | 500,386          | 112,231 (22.4%)  | 388,155 (77.6%)  |                         |
| <i>General demographics</i>       |                              |                  |                  |                  |                         |
| Calendar year (cont.)             | Mean (SD)                    | 2011.5 (2.9)     | 2013.2 (2.4)     | 2011.1 (2.8)     | 0.78                    |
|                                   | Median (IQR)                 | 2012 (2009–2014) | 2014 (2011–2015) | 2011 (2009–2013) |                         |
| Calendar year (cat.)              | 2007–2009                    | 147,885 (29.6%)  | 12,679 (11.3%)   | 135,206 (34.8%)  | 0.58                    |
|                                   | 2010–2012                    | 149,578 (29.9%)  | 26,849 (23.9%)   | 122,729 (31.6%)  | 0.17                    |
|                                   | 2013–2016                    | 202,923 (40.6%)  | 72,703 (64.8%)   | 130,220 (33.5%)  | 0.66                    |
| Sex                               | Female                       | 252,066 (50.4%)  | 56,524 (50.4%)   | 195,542 (50.4%)  | 0                       |
|                                   | Male                         | 248,320 (49.6%)  | 55,707 (49.6%)   | 192,613 (49.6%)  |                         |
| Age (cont.)                       | Mean (SD)                    | 65.2 (14.1)      | 66.9 (14.3)      | 64.7 (14.0)      | 0.15                    |
|                                   | Median (IQR)                 | 66.0 (56.2–75.5) | 68.0 (57.8–77.5) | 65.5 (55.8–74.8) |                         |
| Age (cat.)                        | 18–29                        | 7,071 (1.4%)     | 1,474 (1.3%)     | 5,597 (1.4%)     | 0.01                    |
|                                   | 30–39                        | 17,438 (3.5%)    | 3,352 (3.0%)     | 14,086 (3.6%)    | 0.04                    |
|                                   | 40–49                        | 45,381 (9.1%)    | 8,819 (7.9%)     | 36,562 (9.4%)    | 0.06                    |
|                                   | 50–59                        | 98,746 (19.7%)   | 19,640 (17.5%)   | 79,106 (20.4%)   | 0.07                    |
|                                   | 60–69                        | 138,191 (27.6%)  | 29,287 (26.1%)   | 108,904 (28.1%)  | 0.04                    |
|                                   | 70–79                        | 116,358 (23.3%)  | 27,954 (24.9%)   | 88,404 (22.8%)   | 0.05                    |
|                                   | 80–89                        | 66,601 (13.3%)   | 18,445 (16.4%)   | 48,156 (12.4%)   | 0.11                    |
|                                   | 90–100                       | 10,600 (2.1%)    | 3,260 (2.9%)     | 7,340 (1.9%)     | 0.07                    |
| Neighbourhood income quintile     | 1 - Low                      | 96,029 (19.2%)   | 22,374 (19.9%)   | 73,655 (19.0%)   | 0.02                    |
|                                   | 2                            | 100,846 (20.2%)  | 23,340 (20.8%)   | 77,506 (20.0%)   | 0.02                    |
|                                   | 3                            | 98,596 (19.7%)   | 22,225 (19.8%)   | 76,371 (19.7%)   | 0                       |
|                                   | 4                            | 100,394 (20.1%)  | 21,812 (19.4%)   | 78,582 (20.2%)   | 0.02                    |
|                                   | 5 - High                     | 102,822 (20.5%)  | 22,171 (19.8%)   | 80,651 (20.8%)   | 0.03                    |
|                                   | Missing                      | 1,699 (0.3%)     | 309 (0.3%)       | 1,390 (0.4%)     |                         |
| Low-income senior (age 66+)       | Yes                          | 40,634 (16.2%)   | 10,204 (16.4%)   | 30,430 (16.2%)   | 0.01                    |
| Residence location                | Urban                        | 432,560 (86.4%)  | 97,523 (86.9%)   | 335,037 (86.3%)  | 0.02                    |
|                                   | Rural                        | 67,416 (13.5%)   | 14,571 (13.0%)   | 52,845 (13.6%)   | 0.02                    |
|                                   | Missing                      | 410 (0.1%)       | 137 (0.1%)       | 273 (0.1%)       |                         |
| Recently living in Long-Term Care | Yes                          | 8,309 (1.7%)     | 2,424 (2.2%)     | 5,885 (1.5%)     | 0.05                    |
| Landed immigrant (cat.)           | Non-immigrant                | 450,600 (90.1%)  | 99,372 (88.5%)   | 351,228 (90.5%)  | 0.06                    |
|                                   | Recent immigrant (≤10 years) | 14,442 (2.9%)    | 3,135 (2.8%)     | 11,307 (2.9%)    | 0.01                    |
|                                   | Past immigrant (>10 years)   | 35,344 (7.1%)    | 9,724 (8.7%)     | 25,620 (6.6%)    | 0.08                    |
| Ethnicity                         | General Population           | 475,426 (95.0%)  | 105,240 (93.8%)  | 370,186 (95.4%)  | 0.07                    |



|                                                    |              |                  |                  |                  |      |
|----------------------------------------------------|--------------|------------------|------------------|------------------|------|
|                                                    | Chinese      | 17,044 (3.4%)    | 4,879 (4.3%)     | 12,165 (3.1%)    | 0.06 |
|                                                    | South Asian  | 7,916 (1.6%)     | 2,112 (1.9%)     | 5,804 (1.5%)     | 0.03 |
| Time eligible in OHIP (years)                      | Mean (SD)    | 19.8 (5.5)       | 21.1 (5.8)       | 19.4 (5.4)       | 0.31 |
|                                                    | Median (IQR) | 20.7 (17.9–23.6) | 22.9 (19.6–25.0) | 20.2 (17.7–23.0) |      |
| Health Services Utilization                        |              |                  |                  |                  |      |
| Any OHIP billings in the year prior                | Yes          | 495,345 (99.0%)  | 111,616 (99.5%)  | 383,729 (98.9%)  | 0.06 |
| Any ODB records on/in the year prior (age 66+)     | Yes          | 241,453 (96.5%)  | 60,465 (97.1%)   | 180,988 (96.3%)  | 0.04 |
| Physician Billings (2 years prior)                 |              |                  |                  |                  |      |
| Any core primary care visits to GP/FP              | Yes          | 477,551 (95.4%)  | 107,481 (95.8%)  | 370,070 (95.3%)  | 0.02 |
| Core primary care visits to GP/FP (cont.)          | Mean (SD)    | 2.8 (3.3)        | 2.9 (3.5)        | 2.8 (3.3)        | 0.05 |
|                                                    | Median (IQR) | 1 (1–3)          | 2 (1–4)          | 1 (1–3)          |      |
| Core primary care visits to GP/FP (cat.)           | 0            | 22,835 (4.6%)    | 4,750 (4.2%)     | 18,085 (4.7%)    | 0.02 |
|                                                    | 1 - 2        | 283,140 (56.6%)  | 61,661 (54.9%)   | 221,479 (57.1%)  | 0.04 |
|                                                    | 3 - 4        | 104,693 (20.9%)  | 24,009 (21.4%)   | 80,684 (20.8%)   | 0.01 |
|                                                    | 5 - 9        | 70,557 (14.1%)   | 16,980 (15.1%)   | 53,577 (13.8%)   | 0.04 |
|                                                    | 10+          | 19,161 (3.8%)    | 4,831 (4.3%)     | 14,330 (3.7%)    | 0.03 |
| Emergency and inpatient admissions (2 years prior) |              |                  |                  |                  |      |
| Any unscheduled ED visits                          | Yes          | 249,142 (49.8%)  | 65,094 (58.0%)   | 184,048 (47.4%)  | 0.21 |
| Unscheduled ED visits (cont.)                      | Mean (SD)    | 1.2 (2.1)        | 1.5 (2.4)        | 1.1 (2.1)        | 0.15 |
|                                                    | Median (IQR) | 0 (0–2)          | 1 (0–2)          | 0 (0–1)          |      |
| Any inpatient hospitalization episodes             | Yes          | 70,996 (14.2%)   | 20,299 (18.1%)   | 50,697 (13.1%)   | 0.14 |
| Inpatient hospitalization episodes (cont.)         | Mean (SD)    | 0.2 (0.6)        | 0.3 (0.7)        | 0.2 (0.6)        | 0.12 |
|                                                    | Median (IQR) | 0 (0–0)          | 0 (0–0)          | 0 (0–0)          |      |
| Up to date on cancer screening                     |              |                  |                  |                  |      |
| Pap smear (females age 18 to 70)                   | Yes          | 102,053 (63.2%)  | 20,003 (61.0%)   | 82,050 (63.8%)   | 0.06 |
| Mammogram (females age 50 to 70)                   | Yes          | 82,926 (72.8%)   | 16,220 (67.1%)   | 66,706 (74.3%)   | 0.16 |
| FOBT/sigmoidoscopy/colonoscopy (age 50 to 70)      | Yes          | 141,955 (59.9%)  | 30,057 (61.4%)   | 111,898 (59.5%)  | 0.04 |
| Comorbidities and chronic conditions               |              |                  |                  |                  |      |
| Comorbidities                                      |              |                  |                  |                  |      |
| Charlson score (cont.)                             | Mean (SD)    | 0.3 (1.0)        | 0.4 (1.1)        | 0.3 (0.9)        | 0.12 |
|                                                    | Median (IQR) | 0.0 (0.0–0.0)    | 0.0 (0.0–0.0)    | 0.0 (0.0–0.0)    |      |
| Charlson comorbidities (cat.)                      | 0            | 428,584 (85.7%)  | 92,158 (82.1%)   | 336,426 (86.7%)  | 0.13 |
|                                                    | 1            | 33,110 (6.6%)    | 8,578 (7.6%)     | 24,532 (6.3%)    | 0.05 |
|                                                    | 2            | 17,028 (3.4%)    | 4,830 (4.3%)     | 12,198 (3.1%)    | 0.06 |
|                                                    | 3+           | 21,664 (4.3%)    | 6,665 (5.9%)     | 14,999 (3.9%)    | 0.1  |
| Chronic conditions                                 |              |                  |                  |                  |      |
| Asthma                                             | Yes          | 43,072 (8.6%)    | 10,397 (9.3%)    | 32,675 (8.4%)    | 0.03 |

|                                       |     |                 |                |                 |      |
|---------------------------------------|-----|-----------------|----------------|-----------------|------|
| Congestive heart failure              | Yes | 33,896 (6.8%)   | 9,509 (8.5%)   | 24,387 (6.3%)   | 0.08 |
| Inflammatory bowel disease            | Yes | 1,588 (0.3%)    | 435 (0.4%)     | 1,153 (0.3%)    | 0.02 |
| Chronic obstructive pulmonary disease | Yes | 44,738 (8.9%)   | 11,578 (10.3%) | 33,160 (8.5%)   | 0.06 |
| HIV                                   | Yes | 809 (0.2%)      | 171 (0.2%)     | 638 (0.2%)      | 0    |
| Hypertension                          | Yes | 264,140 (52.8%) | 63,988 (57.0%) | 200,152 (51.6%) | 0.11 |
| Dementia                              | Yes | 16,950 (3.4%)   | 4,807 (4.3%)   | 12,143 (3.1%)   | 0.06 |
| Diabetes                              | Yes | 85,221 (17.0%)  | 23,222 (20.7%) | 61,999 (16.0%)  | 0.12 |
| Chronic rheumatoid arthritis          | Yes | 5,410 (1.1%)    | 1,464 (1.3%)   | 3,946 (1.0%)    | 0.03 |
| Osteoarthritis                        | Yes | 86,044 (17.2%)  | 20,042 (17.9%) | 66,002 (17.0%)  | 0.02 |
| Mood disorder                         | Yes | 62,418 (12.5%)  | 13,807 (12.3%) | 48,611 (12.5%)  | 0.01 |
| Other mental health disorder          | Yes | 25,567 (5.1%)   | 6,629 (5.9%)   | 18,938 (4.9%)   | 0.05 |
| Osteoporosis                          | Yes | 7,114 (1.4%)    | 1,831 (1.6%)   | 5,283 (1.4%)    | 0.02 |
| Renal disease                         | Yes | 18,811 (3.8%)   | 6,303 (5.6%)   | 12,508 (3.2%)   | 0.12 |
| Stroke                                | Yes | 9,398 (1.9%)    | 2,486 (2.2%)   | 6,912 (1.8%)    | 0.03 |
| Chronic coronary syndrome             | Yes | 48,941 (9.8%)   | 12,131 (10.8%) | 36,810 (9.5%)   | 0.04 |
| Acute myocardial infarction           | Yes | 11,096 (2.2%)   | 2,830 (2.5%)   | 8,266 (2.1%)    | 0.03 |

#### *Medication use (age 66+)*

|                                                     |              |                 |                |                |      |
|-----------------------------------------------------|--------------|-----------------|----------------|----------------|------|
| <i>Concurrent medication use</i>                    |              |                 |                |                |      |
| Number of concurrent medications being used (cont.) | Mean (SD)    | 4.2 (3.2)       | 4.6 (3.3)      | 4.0 (3.1)      | 0.18 |
|                                                     | Median (IQR) | 4 (2–6)         | 4 (2–7)        | 4 (2–6)        |      |
| Number of concurrent medications being used (cat.)  | 0            | 29,466 (11.8%)  | 6,034 (9.7%)   | 23,432 (12.5%) | 0.09 |
|                                                     | 1 - 4        | 119,828 (47.9%) | 27,434 (44.1%) | 92,394 (49.2%) | 0.1  |
|                                                     | 5 - 9        | 84,338 (33.7%)  | 23,467 (37.7%) | 60,871 (32.4%) | 0.11 |
|                                                     | 10+          | 16,584 (6.6%)   | 5,342 (8.6%)   | 11,242 (6.0%)  | 0.1  |

#### *Recent medication use*

|                                                |     |                 |                |                |      |
|------------------------------------------------|-----|-----------------|----------------|----------------|------|
| <i>Antiplatelet</i>                            |     |                 |                |                |      |
| Nonsteroidal anti-inflammatory (ASA-based)     | Yes | 10,696 (4.3%)   | 2,062 (3.3%)   | 8,634 (4.6%)   | 0.07 |
| Nonsteroidal anti-inflammatory (non-ASA-based) | Yes | 49,404 (19.7%)  | 11,481 (18.4%) | 37,923 (20.2%) | 0.04 |
| Adenosine diphosphonate inhibitor              | Yes | 16,755 (6.7%)   | 4,772 (7.7%)   | 11,983 (6.4%)  | 0.05 |
| <i>Cardiovascular</i>                          |     |                 |                |                |      |
| Coronary vasodilator (nitrate)                 | Yes | 21,264 (8.5%)   | 5,415 (8.7%)   | 15,849 (8.4%)  | 0.01 |
| Beta blocker                                   | Yes | 69,115 (27.6%)  | 18,561 (29.8%) | 50,554 (26.9%) | 0.06 |
| Calcium channel blocker                        | Yes | 73,721 (29.5%)  | 19,725 (31.7%) | 53,996 (28.7%) | 0.06 |
| ACE inhibitor                                  | Yes | 79,499 (31.8%)  | 19,838 (31.9%) | 59,661 (31.7%) | 0    |
| Angiotensin receptor agonist                   | Yes | 53,630 (21.4%)  | 14,684 (23.6%) | 38,946 (20.7%) | 0.07 |
| <i>Lipid-lowering</i>                          |     |                 |                |                |      |
| Statin                                         | Yes | 124,361 (49.7%) | 33,080 (53.1%) | 91,281 (48.6%) | 0.09 |
| <i>Psychotropics</i>                           |     |                 |                |                |      |

|                                                       |                    |                 |                |                 |      |
|-------------------------------------------------------|--------------------|-----------------|----------------|-----------------|------|
| Tricyclic antidepressant                              | Yes                | 11,944 (4.8%)   | 2,975 (4.8%)   | 8,969 (4.8%)    | 0    |
| Selective serotonin reuptake inhibitor                | Yes                | 27,277 (10.9%)  | 7,311 (11.7%)  | 19,966 (10.6%)  | 0.04 |
| <i>Incident cancer type (Ontario Cancer Registry)</i> |                    |                 |                |                 |      |
|                                                       | Breast             | 79,261 (15.8%)  | 9,857 (8.8%)   | 69,404 (17.9%)  | 0.27 |
|                                                       | Prostate           | 77,572 (15.5%)  | 8,587 (7.7%)   | 68,985 (17.8%)  | 0.31 |
|                                                       | Lung               | 66,390 (13.3%)  | 20,583 (18.3%) | 45,807 (11.8%)  | 0.18 |
|                                                       | Colon              | 63,655 (12.7%)  | 17,259 (15.4%) | 46,396 (12.0%)  | 0.1  |
|                                                       | Other solid tumour | 29,286 (5.9%)   | 8,051 (7.2%)   | 21,235 (5.5%)   | 0.07 |
|                                                       | Thyroid            | 24,656 (4.9%)   | 5,944 (5.3%)   | 18,712 (4.8%)   | 0.02 |
|                                                       | Bladder            | 24,631 (4.9%)   | 6,963 (6.2%)   | 17,668 (4.6%)   | 0.07 |
|                                                       | Melanoma           | 23,661 (4.7%)   | 2,815 (2.5%)   | 20,846 (5.4%)   | 0.15 |
|                                                       | Endometrium        | 18,886 (3.8%)   | 4,500 (4.0%)   | 14,386 (3.7%)   | 0.02 |
|                                                       | Head and neck      | 16,485 (3.3%)   | 3,160 (2.8%)   | 13,325 (3.4%)   | 0.04 |
|                                                       | Kidney             | 15,985 (3.2%)   | 5,272 (4.7%)   | 10,713 (2.8%)   | 0.1  |
|                                                       | Pancreas           | 13,151 (2.6%)   | 5,195 (4.6%)   | 7,956 (2.0%)    | 0.14 |
|                                                       | Stomach            | 10,467 (2.1%)   | 3,365 (3.0%)   | 7,102 (1.8%)    | 0.08 |
|                                                       | Ovary              | 9,111 (1.8%)    | 3,085 (2.7%)   | 6,026 (1.6%)    | 0.08 |
|                                                       | Brain              | 7,405 (1.5%)    | 2,563 (2.3%)   | 4,842 (1.2%)    | 0.08 |
|                                                       | Other GI           | 5,921 (1.2%)    | 1,726 (1.5%)   | 4,195 (1.1%)    | 0.04 |
|                                                       | Esophagus          | 5,511 (1.1%)    | 1,483 (1.3%)   | 4,028 (1.0%)    | 0.03 |
|                                                       | Cervix             | 4,933 (1.0%)    | 833 (0.7%)     | 4,100 (1.1%)    | 0.03 |
|                                                       | Testis             | 3,419 (0.7%)    | 990 (0.9%)     | 2,429 (0.6%)    | 0.03 |
| <i>Follow-up period</i>                               |                    |                 |                |                 |      |
| Follow-up time                                        | Mean (SD)          | 4.0 (3.1)       | 2.6 (2.4)      | 4.4 (3.2)       | 0.62 |
|                                                       | Median (IQR)       | 3.3 (1.2–6.5)   | 1.9 (0.7–3.9)  | 4.0 (1.5–7.1)   |      |
| <i>Deaths in follow-up period</i>                     |                    |                 |                |                 |      |
| Any death                                             | Yes                | 193,504 (38.7%) | 51,738 (46.1%) | 141,766 (36.5%) | 0.2  |
| Any cancer death                                      | Yes                | 149,730 (29.9%) | 41,968 (37.4%) | 107,762 (27.8%) | 0.21 |
| Cancer-specific death                                 | Yes                | 141,081 (28.2%) | 40,329 (35.9%) | 100,752 (26.0%) | 0.22 |

**Table S8.** Descriptive table of cancer patients by baseline platelet count category.

| Description                       | Value                        | Total            | 1 - Low<br>(≤25th pctl) | 2 - Medium<br>(>25 to <75th pctl) | 3 - High<br>(≥75th pctl) |
|-----------------------------------|------------------------------|------------------|-------------------------|-----------------------------------|--------------------------|
| <i>Overall</i>                    |                              | 112,231          | 28,307 (25.2%)          | 55,703 (49.6%)                    | 28,221 (25.1%)           |
| <i>General demographics</i>       |                              |                  |                         |                                   |                          |
| Calendar year (cont.)             | Mean (SD)                    | 2013.2 (2.4)     | 2013.3 (2.4)            | 2013.2 (2.4)                      | 2013.0 (2.5)             |
|                                   | Median (IQR)                 | 2014 (2011–2015) | 2014 (2012–2015)        | 2014 (2011–2015)                  |                          |
| Calendar year (cat.)              | 2007–2009                    | 12,679 (11.3%)   | 2,634 (9.3%)            | 6,231 (11.2%)                     | 3,814 (13.5%)            |
|                                   | 2010–2012                    | 26,849 (23.9%)   | 6,781 (24.0%)           | 13,371 (24.0%)                    | 6,697 (23.7%)            |
|                                   | 2013–2016                    | 72,703 (64.8%)   | 18,892 (66.7%)          | 36,101 (64.8%)                    | 17,710 (62.8%)           |
| Sex                               | Female                       | 56,524 (50.4%)   | 14,241 (50.3%)          | 28,044 (50.3%)                    | 14,239 (50.5%)           |
|                                   | Male                         | 55,707 (49.6%)   | 14,066 (49.7%)          | 27,659 (49.7%)                    | 13,982 (49.5%)           |
| Age (cont.)                       | Mean (SD)                    | 66.9 (14.3)      | 68.7 (14.3)             | 66.4 (14.2)                       | 66.0 (14.2)              |
|                                   | Median (IQR)                 | 68.0 (57.8–77.5) | 70.2 (60.1–79.4)        | 67.4 (57.3–76.9)                  | 66.7 (56.8–76.5)         |
| Age (cat.)                        | 18–29                        | 1,474 (1.3%)     | 369 (1.3%)              | 767 (1.4%)                        | 338 (1.2%)               |
|                                   | 30–39                        | 3,352 (3.0%)     | 780 (2.8%)              | 1,685 (3.0%)                      | 887 (3.1%)               |
|                                   | 40–49                        | 8,819 (7.9%)     | 1,761 (6.2%)            | 4,581 (8.2%)                      | 2,477 (8.8%)             |
|                                   | 50–59                        | 19,640 (17.5%)   | 4,126 (14.6%)           | 10,097 (18.1%)                    | 5,417 (19.2%)            |
|                                   | 60–69                        | 29,287 (26.1%)   | 6,976 (24.6%)           | 14,820 (26.6%)                    | 7,491 (26.5%)            |
|                                   | 70–79                        | 27,954 (24.9%)   | 7,626 (26.9%)           | 13,636 (24.5%)                    | 6,692 (23.7%)            |
|                                   | 80–89                        | 18,445 (16.4%)   | 5,644 (19.9%)           | 8,650 (15.5%)                     | 4,151 (14.7%)            |
|                                   | 90–100                       | 3,260 (2.9%)     | 1,025 (3.6%)            | 1,467 (2.6%)                      | 768 (2.7%)               |
| Neighbourhood income quintile     | 1 - Low                      | 22,374 (19.9%)   | 5,592 (19.8%)           | 10,817 (19.4%)                    | 5,965 (21.1%)            |
|                                   | 2                            | 23,340 (20.8%)   | 5,917 (20.9%)           | 11,544 (20.7%)                    | 5,879 (20.8%)            |
|                                   | 3                            | 22,225 (19.8%)   | 5,540 (19.6%)           | 11,099 (19.9%)                    | 5,586 (19.8%)            |
|                                   | 4                            | 21,812 (19.4%)   | 5,475 (19.3%)           | 10,885 (19.5%)                    | 5,452 (19.3%)            |
|                                   | 5 - High                     | 22,171 (19.8%)   | 5,712 (20.2%)           | 11,207 (20.1%)                    | 5,252 (18.6%)            |
|                                   | Missing                      | 309 (0.3%)       | 71 (0.3%)               | 151 (0.3%)                        | 87 (0.3%)                |
| Low-income senior (age 66+)       | Yes                          | 10,204 (16.4%)   | 3,134 (18.0%)           | 4,714 (15.6%)                     | 2,356 (16.1%)            |
| Residence location                | Urban                        | 97,523 (86.9%)   | 25,005 (88.3%)          | 48,358 (86.8%)                    | 24,160 (85.6%)           |
|                                   | Rural                        | 14,571 (13.0%)   | 3,269 (11.5%)           | 7,276 (13.1%)                     | 4,026 (14.3%)            |
|                                   | Missing                      | 137 (0.1%)       | 33 (0.1%)               | 69 (0.1%)                         | 35 (0.1%)                |
| Recently living in Long-Term Care | Yes                          | 2,424 (2.2%)     | 677 (2.4%)              | 1,038 (1.9%)                      | 709 (2.5%)               |
| Landed immigrant (cat.)           | Non-immigrant                | 99,372 (88.5%)   | 24,907 (88.0%)          | 49,218 (88.4%)                    | 25,247 (89.5%)           |
|                                   | Recent immigrant (≤10 years) | 3,135 (2.8%)     | 833 (2.9%)              | 1,539 (2.8%)                      | 763 (2.7%)               |
|                                   | Past immigrant (>10 years)   | 9,724 (8.7%)     | 2,567 (9.1%)            | 4,946 (8.9%)                      | 2,211 (7.8%)             |

|                                                           |                    |                  |                  |                  |                  |
|-----------------------------------------------------------|--------------------|------------------|------------------|------------------|------------------|
| Ethnicity                                                 | General Population | 105,240 (93.8%)  | 26,342 (93.1%)   | 52,201 (93.7%)   | 26,697 (94.6%)   |
|                                                           | Chinese            | 4,879 (4.3%)     | 1,531 (5.4%)     | 2,426 (4.4%)     | 922 (3.3%)       |
|                                                           | South Asian        | 2,112 (1.9%)     | 434 (1.5%)       | 1,076 (1.9%)     | 602 (2.1%)       |
| Time eligible in OHIP (years)                             | Mean (SD)          | 21.1 (5.8)       | 21.2 (5.9)       | 21.2 (5.7)       | 21.1 (5.7)       |
|                                                           | Median (IQR)       | 22.9 (19.6–25.0) | 23.0 (19.8–25.1) | 22.9 (19.6–25.0) | 22.8 (19.4–25.0) |
| <b>Health Services Utilization</b>                        |                    |                  |                  |                  |                  |
| Any OHIP billings in the year prior                       | Yes                | 111,616 (99.5%)  | 28,202 (99.6%)   | 55,428 (99.5%)   | 27,986 (99.2%)   |
| Any ODB records on/in the year prior (age 66+)            | Yes                | 60,465 (97.1%)   | 17,046 (97.7%)   | 29,263 (97.1%)   | 14,156 (96.5%)   |
| <i>Physician Billings (2 years prior)</i>                 |                    |                  |                  |                  |                  |
| Any core primary care visits to GP/FP                     | Yes                | 107,481 (95.8%)  | 27,260 (96.3%)   | 53,514 (96.1%)   | 26,707 (94.6%)   |
| Core primary care visits to GP/FP (cont.)                 | Mean (SD)          | 2.9 (3.5)        | 3.0 (3.7)        | 3.0 (3.5)        | 2.8 (3.3)        |
|                                                           | Median (IQR)       | 2 (1–4)          | 2 (1–4)          | 2 (1–4)          | 1 (1–3)          |
| Core primary care visits to GP/FP (cat.)                  | 0                  | 4,750 (4.2%)     | 1,047 (3.7%)     | 2,189 (3.9%)     | 1,514 (5.4%)     |
|                                                           | 1 - 2              | 61,661 (54.9%)   | 15,279 (54.0%)   | 30,527 (54.8%)   | 15,855 (56.2%)   |
|                                                           | 3 - 4              | 24,009 (21.4%)   | 6,172 (21.8%)    | 12,036 (21.6%)   | 5,801 (20.6%)    |
|                                                           | 5 - 9              | 16,980 (15.1%)   | 4,494 (15.9%)    | 8,479 (15.2%)    | 4,007 (14.2%)    |
|                                                           | 10+                | 4,831 (4.3%)     | 1,315 (4.6%)     | 2,472 (4.4%)     | 1,044 (3.7%)     |
| <i>Emergency and inpatient admissions (2 years prior)</i> |                    |                  |                  |                  |                  |
| Any unscheduled ED visits                                 | Yes                | 65,094 (58.0%)   | 16,583 (58.6%)   | 31,558 (56.7%)   | 16,953 (60.1%)   |
| Unscheduled ED visits (cont.)                             | Mean (SD)          | 1.5 (2.4)        | 1.5 (2.7)        | 1.4 (2.2)        | 1.5 (2.5)        |
|                                                           | Median (IQR)       | 1 (0–2)          | 1 (0–2)          | 1 (0–2)          | 1 (0–2)          |
| Any inpatient hospitalization episodes                    | Yes                | 20,299 (18.1%)   | 5,578 (19.7%)    | 9,355 (16.8%)    | 5,366 (19.0%)    |
| Inpatient hospitalization episodes (cont.)                | Mean (SD)          | 0.3 (0.7)        | 0.3 (0.8)        | 0.2 (0.7)        | 0.3 (0.7)        |
|                                                           | Median (IQR)       | 0 (0–0)          | 0 (0–0)          | 0 (0–0)          | 0 (0–0)          |
| <i>Up to date on cancer screening</i>                     |                    |                  |                  |                  |                  |
| Pap smear (females age 18 to 70)                          | Yes                | 20,003 (61.0%)   | 4,813 (63.2%)    | 10,520 (63.0%)   | 4,670 (55.2%)    |
| Mammogram (females age 50 to 70)                          | Yes                | 16,220 (67.1%)   | 3,937 (69.3%)    | 8,565 (69.4%)    | 3,718 (60.3%)    |
| FOBT/sigmoidoscopy/colonoscopy (age 50 to 70)             | Yes                | 30,057 (61.4%)   | 7,348 (66.2%)    | 15,647 (62.8%)   | 7,062 (54.7%)    |
| <b>Comorbidities and chronic conditions</b>               |                    |                  |                  |                  |                  |
| <i>Comorbidities</i>                                      |                    |                  |                  |                  |                  |
| Charlson score (cont.)                                    | Mean (SD)          | 0.4 (1.1)        | 0.5 (1.2)        | 0.4 (1.1)        | 0.4 (1.1)        |
|                                                           | Median (IQR)       | 0 (0–0)          | 0 (0–0)          | 0 (0–0)          | 0 (0–0)          |
| Charlson comorbidities (cat.)                             | 0                  | 92,158 (82.1%)   | 22,398 (79.1%)   | 46,492 (83.5%)   | 23,268 (82.4%)   |
|                                                           | 1                  | 8,578 (7.6%)     | 2,351 (8.3%)     | 4,038 (7.2%)     | 2,189 (7.8%)     |
|                                                           | 2                  | 4,830 (4.3%)     | 1,482 (5.2%)     | 2,190 (3.9%)     | 1,158 (4.1%)     |
|                                                           | 3+                 | 6,665 (5.9%)     | 2,076 (7.3%)     | 2,983 (5.4%)     | 1,606 (5.7%)     |

*Chronic conditions*

|                                       |     |                |                |                |                |
|---------------------------------------|-----|----------------|----------------|----------------|----------------|
| Asthma                                | Yes | 10,397 (9.3%)  | 2,544 (9.0%)   | 5,272 (9.5%)   | 2,581 (9.1%)   |
| Congestive heart failure              | Yes | 9,509 (8.5%)   | 3,292 (11.6%)  | 4,329 (7.8%)   | 1,888 (6.7%)   |
| Inflammatory bowel disease            | Yes | 435 (0.4%)     | 96 (0.3%)      | 172 (0.3%)     | 167 (0.6%)     |
| Chronic obstructive pulmonary disease | Yes | 11,578 (10.3%) | 2,994 (10.6%)  | 5,588 (10.0%)  | 2,996 (10.6%)  |
| HIV                                   | Yes | 171 (0.2%)     | 53 (0.2%)      | 79 (0.1%)      | 39 (0.1%)      |
| Hypertension                          | Yes | 63,988 (57.0%) | 17,283 (61.1%) | 31,249 (56.1%) | 15,456 (54.8%) |
| Dementia                              | Yes | 4,807 (4.3%)   | 1,389 (4.9%)   | 2,200 (3.9%)   | 1,218 (4.3%)   |
| Diabetes                              | Yes | 23,222 (20.7%) | 6,388 (22.6%)  | 11,128 (20.0%) | 5,706 (20.2%)  |
| Chronic rheumatoid arthritis          | Yes | 1,464 (1.3%)   | 393 (1.4%)     | 708 (1.3%)     | 363 (1.3%)     |
| Osteoarthritis                        | Yes | 20,042 (17.9%) | 5,627 (19.9%)  | 9,878 (17.7%)  | 4,537 (16.1%)  |
| Mood disorder                         | Yes | 13,807 (12.3%) | 3,596 (12.7%)  | 6,848 (12.3%)  | 3,363 (11.9%)  |
| Other mental health disorder          | Yes | 6,629 (5.9%)   | 1,794 (6.3%)   | 3,103 (5.6%)   | 1,732 (6.1%)   |
| Osteoporosis                          | Yes | 1,831 (1.6%)   | 526 (1.9%)     | 877 (1.6%)     | 428 (1.5%)     |
| Renal disease                         | Yes | 6,303 (5.6%)   | 2,147 (7.6%)   | 2,772 (5.0%)   | 1,384 (4.9%)   |
| Stroke                                | Yes | 2,486 (2.2%)   | 724 (2.6%)     | 1,147 (2.1%)   | 615 (2.2%)     |
| Chronic coronary syndrome             | Yes | 12,131 (10.8%) | 4,089 (14.4%)  | 5,685 (10.2%)  | 2,357 (8.4%)   |
| Acute myocardial infarction           | Yes | 2,830 (2.5%)   | 875 (3.1%)     | 1,338 (2.4%)   | 617 (2.2%)     |

#### *Medication use (age 66+)*

| <i>Concurrent medication use</i>                    |              |                |               |                |               |
|-----------------------------------------------------|--------------|----------------|---------------|----------------|---------------|
| Number of concurrent medications being used (cont.) | Mean (SD)    | 4.6 (3.3)      | 4.8 (3.4)     | 4.5 (3.3)      | 4.6 (3.3)     |
|                                                     | Median (IQR) | 4 (2–7)        | 4 (2–7)       | 4 (2–7)        | 4 (2–7)       |
| Number of concurrent medications being used (cat.)  | 0            | 6,034 (9.7%)   | 1,560 (8.9%)  | 2,988 (9.9%)   | 1,486 (10.1%) |
|                                                     | 1 - 4        | 27,434 (44.1%) | 7,459 (42.7%) | 13,603 (45.1%) | 6,372 (43.4%) |
|                                                     | 5 - 9        | 23,467 (37.7%) | 6,814 (39.0%) | 11,053 (36.7%) | 5,600 (38.2%) |
|                                                     | 10+          | 5,342 (8.6%)   | 1,623 (9.3%)  | 2,503 (8.3%)   | 1,216 (8.3%)  |

#### *Recent medication use*

| <i>Antiplatelet</i>                            |     |                |                |                |               |
|------------------------------------------------|-----|----------------|----------------|----------------|---------------|
| Nonsteroidal anti-inflammatory (ASA-based)     | Yes | 2,062 (3.3%)   | 564 (3.2%)     | 999 (3.3%)     | 499 (3.4%)    |
| Nonsteroidal anti-inflammatory (non-ASA-based) | Yes | 11,481 (18.4%) | 3,149 (18.0%)  | 5,513 (18.3%)  | 2,819 (19.2%) |
| Adenosine disphosphonate inhibitor             | Yes | 4,772 (7.7%)   | 1,504 (8.6%)   | 2,256 (7.5%)   | 1,012 (6.9%)  |
| <i>Cardiovascular</i>                          |     |                |                |                |               |
| Coronary vasodilator (nitrate)                 | Yes | 5,415 (8.7%)   | 1,845 (10.6%)  | 2,515 (8.3%)   | 1,055 (7.2%)  |
| Beta blocker                                   | Yes | 18,561 (29.8%) | 6,178 (35.4%)  | 8,620 (28.6%)  | 3,763 (25.6%) |
| Calcium channel blocker                        | Yes | 19,725 (31.7%) | 5,329 (30.5%)  | 9,513 (31.6%)  | 4,883 (33.3%) |
| ACE inhibitor                                  | Yes | 19,838 (31.9%) | 5,729 (32.8%)  | 9,476 (31.4%)  | 4,633 (31.6%) |
| Angiotensin receptor agonist                   | Yes | 14,684 (23.6%) | 4,363 (25.0%)  | 7,072 (23.5%)  | 3,249 (22.1%) |
| <i>Lipid-lowering</i>                          |     |                |                |                |               |
| Statin                                         | Yes | 33,080 (53.1%) | 10,039 (57.5%) | 15,912 (52.8%) | 7,129 (48.6%) |

|                                                              |                    |                |                |                |                |
|--------------------------------------------------------------|--------------------|----------------|----------------|----------------|----------------|
| <i>Psychotropics</i>                                         |                    |                |                |                |                |
| Tricyclic antidepressant                                     | Yes                | 2,975 (4.8%)   | 767 (4.4%)     | 1,446 (4.8%)   | 762 (5.2%)     |
| Selective serotonin reuptake inhibitor                       | Yes                | 7,311 (11.7%)  | 1,971 (11.3%)  | 3,547 (11.8%)  | 1,793 (12.2%)  |
| <b><i>Incident cancer type (Ontario Cancer Registry)</i></b> |                    |                |                |                |                |
|                                                              | Lung               | 20,583 (18.3%) | 5,171 (18.3%)  | 10,256 (18.4%) | 5,156 (18.3%)  |
|                                                              | Colon              | 17,259 (15.4%) | 4,368 (15.4%)  | 8,561 (15.4%)  | 4,330 (15.3%)  |
|                                                              | Breast             | 9,857 (8.8%)   | 2,483 (8.8%)   | 4,875 (8.8%)   | 2,499 (8.9%)   |
|                                                              | Prostate           | 8,587 (7.7%)   | 2,157 (7.6%)   | 4,269 (7.7%)   | 2,161 (7.7%)   |
|                                                              | Other solid tumour | 8,051 (7.2%)   | 2,036 (7.2%)   | 3,995 (7.2%)   | 2,020 (7.2%)   |
|                                                              | Bladder            | 6,963 (6.2%)   | 1,768 (6.2%)   | 3,445 (6.2%)   | 1,750 (6.2%)   |
|                                                              | Thyroid            | 5,944 (5.3%)   | 1,497 (5.3%)   | 2,943 (5.3%)   | 1,504 (5.3%)   |
|                                                              | Kidney             | 5,272 (4.7%)   | 1,334 (4.7%)   | 2,618 (4.7%)   | 1,320 (4.7%)   |
|                                                              | Pancreas           | 5,195 (4.6%)   | 1,309 (4.6%)   | 2,576 (4.6%)   | 1,310 (4.6%)   |
|                                                              | Endometrium        | 4,500 (4.0%)   | 1,126 (4.0%)   | 2,238 (4.0%)   | 1,136 (4.0%)   |
|                                                              | Stomach            | 3,365 (3.0%)   | 847 (3.0%)     | 1,673 (3.0%)   | 845 (3.0%)     |
|                                                              | Head and neck      | 3,160 (2.8%)   | 794 (2.8%)     | 1,575 (2.8%)   | 791 (2.8%)     |
|                                                              | Ovary              | 3,085 (2.7%)   | 781 (2.8%)     | 1,527 (2.7%)   | 777 (2.8%)     |
|                                                              | Melanoma           | 2,815 (2.5%)   | 710 (2.5%)     | 1,397 (2.5%)   | 708 (2.5%)     |
|                                                              | Brain              | 2,563 (2.3%)   | 650 (2.3%)     | 1,267 (2.3%)   | 646 (2.3%)     |
|                                                              | Other GI           | 1,726 (1.5%)   | 437 (1.5%)     | 856 (1.5%)     | 433 (1.5%)     |
|                                                              | Esophagus          | 1,483 (1.3%)   | 375 (1.3%)     | 734 (1.3%)     | 374 (1.3%)     |
|                                                              | Testis             | 990 (0.9%)     | 253 (0.9%)     | 489 (0.9%)     | 248 (0.9%)     |
|                                                              | Cervix             | 833 (0.7%)     | 211 (0.7%)     | 409 (0.7%)     | 213 (0.8%)     |
| <b><i>Complete blood count</i></b>                           |                    |                |                |                |                |
| Number of baseline CBC observations (cont.)                  | Mean (SD)          | 1.5 (1.3)      | 1.5 (1.5)      | 1.4 (1.2)      | 1.5 (1.4)      |
|                                                              | Median (IQR)       | 1 (1–2)        | 1 (1–1)        | 1 (1–1)        | 1 (1–2)        |
| Number of baseline CBC observations (cat.)                   | 1                  | 83,819 (74.7%) | 21,324 (75.3%) | 42,353 (76.0%) | 20,142 (71.4%) |
|                                                              | 2                  | 18,559 (16.5%) | 4,512 (15.9%)  | 8,935 (16.0%)  | 5,112 (18.1%)  |
|                                                              | 3+                 | 9,853 (8.8%)   | 2,471 (8.7%)   | 4,415 (7.9%)   | 2,967 (10.5%)  |
| Days from baseline CBC to cancer diagnosis                   | Mean (SD)          | 12.6 (9.5)     | 12.4 (9.6)     | 12.8 (9.5)     | 12.4 (9.5)     |
|                                                              | Median (IQR)       | 12 (4–21)      | 12 (4–21)      | 12 (4–21)      | 12 (4–21)      |
| Number of CBC observations in the follow-up period (cont.)   | Mean (SD)          | 15.0 (20.3)    | 15.8 (21.2)    | 14.8 (19.4)    | 14.8 (21.0)    |
|                                                              | Median (IQR)       | 8 (3–20)       | 9 (3–20)       | 8 (3–19)       | 8 (2–20)       |
| Number of CBC observations in the follow-up period (cat.)    | 0                  | 13,109 (11.7%) | 2,674 (9.4%)   | 6,121 (11.0%)  | 4,314 (15.3%)  |
|                                                              | 1 - 4              | 25,385 (22.6%) | 6,235 (22.0%)  | 13,013 (23.4%) | 6,137 (21.7%)  |
|                                                              | 5 - 9              | 21,958 (19.6%) | 5,705 (20.2%)  | 11,188 (20.1%) | 5,065 (17.9%)  |
|                                                              | 10 - 19            | 23,405 (20.9%) | 6,205 (21.9%)  | 11,557 (20.7%) | 5,643 (20.0%)  |
|                                                              | 20 - 29            | 11,679 (10.4%) | 3,086 (10.9%)  | 5,789 (10.4%)  | 2,804 (9.9%)   |

|                                   |              |                |                |                |                |
|-----------------------------------|--------------|----------------|----------------|----------------|----------------|
|                                   | 30+          | 16,695 (14.9%) | 4,402 (15.6%)  | 8,035 (14.4%)  | 4,258 (15.1%)  |
| <b>Follow-up period</b>           |              |                |                |                |                |
| Follow-up time                    | Mean (SD)    | 2.6 (2.4)      | 2.7 (2.3)      | 2.7 (2.4)      | 2.3 (2.5)      |
|                                   | Median (IQR) | 1.9 (0.7–3.9)  | 2.1 (0.9–4.0)  | 2.0 (0.8–4.1)  | 1.5 (0.3–3.5)  |
| <b>Deaths in follow-up period</b> |              |                |                |                |                |
| Any death                         | Yes          | 51,738 (46.1%) | 11,940 (42.2%) | 24,085 (43.2%) | 15,713 (55.7%) |
| Any cancer death                  | Yes          | 41,968 (37.4%) | 9,048 (32.0%)  | 19,600 (35.2%) | 13,320 (47.2%) |
| Cancer-specific death             | Yes          | 40,329 (35.9%) | 8,666 (30.6%)  | 18,845 (33.8%) | 12,818 (45.4%) |

**Table S9.** Sex- and cancer-specific platelet count reference distributions for exposure definition.

| Sex    | Cancer Type         | Frequency | Platelet count distribution |                    |     |       |       |       |     |
|--------|---------------------|-----------|-----------------------------|--------------------|-----|-------|-------|-------|-----|
|        |                     |           | Mean                        | Standard Deviation | P10 | P25   | P50   | P75   | P90 |
| Female | All cancers         | 56,524    | 291.5                       | 105.2              | 187 | 224   | 272   | 336   | 420 |
|        | Bladder             | 1,652     | 273.0                       | 99.5               | 176 | 212   | 255   | 309   | 388 |
|        | Brain               | 1,154     | 266.2                       | 71.1               | 180 | 216   | 259   | 309   | 361 |
|        | Breast              | 9,857     | 261.3                       | 76.3               | 181 | 214   | 252   | 297   | 347 |
|        | Cervix*             | 833       | 306.4                       | 112.7              | 197 | 235   | 284   | 350   | 437 |
|        | Colon*              | 8,188     | 330.3                       | 123.2              | 201 | 246   | 307   | 389   | 489 |
|        | Endometrium         | 4,500     | 276.4                       | 87.3               | 189 | 221   | 262   | 311   | 381 |
|        | Esophagus*          | 358       | 298.3                       | 104.8              | 190 | 229   | 276   | 354   | 435 |
|        | Head and neck       | 788       | 267.0                       | 78.2               | 178 | 218   | 261   | 311   | 366 |
|        | Kidney              | 1,842     | 284.9                       | 105.6              | 183 | 219   | 263   | 326   | 417 |
|        | Lung*               | 10,036    | 308.5                       | 113.2              | 189 | 232   | 289   | 363   | 451 |
|        | Melanoma            | 1,224     | 261.7                       | 75.9               | 177 | 214   | 252.5 | 297   | 349 |
|        | Other GI*           | 980       | 294.2                       | 98.7               | 189 | 226.5 | 279   | 345   | 421 |
|        | Other solid tumour* | 3,660     | 298.7                       | 120.4              | 183 | 224   | 276   | 348   | 449 |
|        | Ovary*              | 3,085     | 340.4                       | 122.4              | 210 | 255   | 317   | 403   | 498 |
|        | Pancreas            | 2,536     | 270.5                       | 93.8               | 167 | 207   | 257   | 321   | 385 |
|        | Stomach*            | 1,224     | 312.2                       | 125.4              | 191 | 237.5 | 292   | 366   | 454 |
|        | Thyroid             | 4,607     | 256.6                       | 63.3               | 185 | 213   | 251   | 292   | 336 |
| Male   | All cancers         | 55,707    | 258.5                       | 99.3               | 159 | 194   | 240   | 300   | 380 |
|        | Bladder             | 5,311     | 229.1                       | 76.1               | 151 | 180   | 218   | 262   | 319 |
|        | Brain               | 1,409     | 235.7                       | 65.4               | 161 | 193   | 231   | 270   | 313 |
|        | Colon*              | 9,071     | 284.9                       | 110.7              | 172 | 210   | 263   | 336   | 425 |
|        | Esophagus*          | 1,125     | 280.8                       | 108.2              | 175 | 210   | 264   | 327   | 411 |
|        | Head and neck       | 2,372     | 243.8                       | 78.5               | 161 | 192   | 234.5 | 279.5 | 340 |
|        | Kidney              | 3,430     | 250.8                       | 95.5               | 161 | 191   | 231   | 288   | 358 |



|                            |               |              |              |            |            |              |            |            |
|----------------------------|---------------|--------------|--------------|------------|------------|--------------|------------|------------|
| <b>Lung*</b>               | <b>10,547</b> | <b>288.5</b> | <b>115.3</b> | <b>168</b> | <b>211</b> | <b>268</b>   | <b>343</b> | <b>435</b> |
| Melanoma                   | 1,591         | 227.9        | 72.6         | 155        | 184        | 217          | 257        | 309        |
| <b>Other GI*</b>           | <b>746</b>    | <b>267.3</b> | <b>111.3</b> | <b>154</b> | <b>199</b> | <b>246.5</b> | <b>312</b> | <b>392</b> |
| <b>Other solid tumour*</b> | <b>4,391</b>  | <b>259.3</b> | <b>103.1</b> | <b>151</b> | <b>190</b> | <b>242</b>   | <b>308</b> | <b>387</b> |
| Pancreas                   | 2,659         | 243.9        | 90.3         | 148        | 184        | 230          | 286        | 355        |
| Prostate                   | 8,587         | 228.8        | 73.8         | 152        | 182        | 219          | 263        | 316        |
| <b>Stomach*</b>            | <b>2,141</b>  | <b>283.5</b> | <b>107.8</b> | <b>171</b> | <b>209</b> | <b>266</b>   | <b>335</b> | <b>419</b> |
| Testis                     | 990           | 244.5        | 68.4         | 172        | 202        | 235          | 278        | 326        |
| Thyroid                    | 1,337         | 228.9        | 63.2         | 162        | 187        | 220          | 259        | 305        |

\* Bolded rows have mean values that exceed the overall mean for the respective sex. P10 = 10<sup>th</sup> percentile, P25 = 25<sup>th</sup> percentile, P50 = 50<sup>th</sup> percentile, P75 = 75<sup>th</sup> percentile, P90 = 90<sup>th</sup> percentile.

**Table S10.** Distribution of aggregate cancer stage by cancer site.

| <b>Cancer type</b> | <b>Total</b>   | <b>Stage I</b>        | <b>Stage II</b>       | <b>Stage III</b>      | <b>Stage IV</b>       | <b>Unknown</b>        |
|--------------------|----------------|-----------------------|-----------------------|-----------------------|-----------------------|-----------------------|
| <i>All cancers</i> | <i>112,231</i> | <i>19,058 (17.0%)</i> | <i>16,936 (15.1%)</i> | <i>15,098 (13.5%)</i> | <i>23,406 (20.9%)</i> | <i>37,733 (33.6%)</i> |
| Lung               | 20,583 (18.3%) | 3,506 (17.0%)         | 1,416 (6.9%)          | 3,627 (17.6%)         | 10,273 (49.9%)        | 1,761 (8.6%)          |
| Colon              | 17,259 (15.4%) | 2,939 (17.0%)         | 4,414 (25.6%)         | 4,790 (27.8%)         | 3,771 (21.8%)         | 1,345 (7.8%)          |
| Breast             | 9,857 (8.8%)   | 3,667 (37.2%)         | 3,488 (35.4%)         | 1,415 (14.4%)         | 838 (8.5%)            | 449 (4.6%)            |
| Prostate           | 8,587 (7.7%)   | 1,480 (17.2%)         | 3,772 (43.9%)         | 779 (9.1%)            | 1,738 (20.2%)         | 818 (9.5%)            |
| Other solid tumour | 8,051 (7.2%)   | 431 (5.4%)            | 490 (6.1%)            | 436 (5.4%)            | 634 (7.9%)            | 6,060 (75.3%)         |
| Bladder            | 6,963 (6.2%)   | 171 (2.5%)            | 368 (5.3%)            | 108 (1.6%)            | 364 (5.2%)            | 5,952 (85.5%)         |
| Thyroid            | 5,944 (5.3%)   | 1,431 (24.1%)         | 219 (3.7%)            | 236 (4.0%)            | 167 (2.8%)            | 3,891 (65.5%)         |
| Kidney             | 5,272 (4.7%)   | 524 (9.9%)            | 103 (2.0%)            | 299 (5.7%)            | 596 (11.3%)           | 3,750 (71.1%)         |
| Pancreas           | 5,195 (4.6%)   | 198 (3.8%)            | 598 (11.5%)           | 369 (7.1%)            | 1,320 (25.4%)         | 2,710 (52.2%)         |
| Endometrium        | 4,500 (4.0%)   | 2,050 (45.6%)         | 270 (6.0%)            | 394 (8.8%)            | 273 (6.1%)            | 1,513 (33.6%)         |
| Stomach            | 3,365 (3.0%)   | 172 (5.1%)            | 218 (6.5%)            | 271 (8.1%)            | 698 (20.7%)           | 2,006 (59.6%)         |
| Head and neck      | 3,160 (2.8%)   | 363 (11.5%)           | 344 (10.9%)           | 427 (13.5%)           | 1,305 (41.3%)         | 721 (22.8%)           |
| Ovary              | 3,085 (2.7%)   | 461 (14.9%)           | 190 (6.2%)            | 1,014 (32.9%)         | 411 (13.3%)           | 1,009 (32.7%)         |
| Melanoma           | 2,815 (2.5%)   | 714 (25.4%)           | 460 (16.3%)           | 224 (8.0%)            | 152 (5.4%)            | 1,265 (44.9%)         |
| Brain              | 2,563 (2.3%)   | 0 (0.0%)              | 0 (0.0%)              | 0 (0.0%)              | 0 (0.0%)              | 2,563 (100.0%)        |
| Other GI           | 1,726 (1.5%)   | 74 (4.3%)             | 185 (10.7%)           | 246 (14.3%)           | 303 (17.6%)           | 918 (53.2%)           |
| Esophagus          | 1,483 (1.3%)   | 49 (3.3%)             | 142 (9.6%)            | 218 (14.7%)           | 409 (27.6%)           | 665 (44.8%)           |
| Testis             | 990 (0.9%)     | 512 (51.7%)           | 116 (11.7%)           | 81 (8.2%)             | 0 (0.0%)              | 281 (28.4%)           |
| Cervix             | 833 (0.7%)     | 316 (37.9%)           | 143 (17.2%)           | 164 (19.7%)           | 154 (18.5%)           | 56 (6.7%)             |

**Table S11.** Cancer-specific mortality rates and hazard ratios by baseline platelet count category (exposure definition 1), for all cancers.

| Cancer      | Platelet category                    | Person-years | Cancer-specific deaths | Rate (% per year) | Unadjusted       |         | Patient variable adjustment* |         | Patient variable and cancer stage adjustment** |         |
|-------------|--------------------------------------|--------------|------------------------|-------------------|------------------|---------|------------------------------|---------|------------------------------------------------|---------|
|             |                                      |              |                        |                   | HR (95% CI)      | P-value | HR (95% CI)                  | P-value | HR (95% CI)                                    | P-value |
| All cancers | 1 - Low ( $\leq$ 25th pctl)          | 76,425.8     | 8,666                  | 11.3              | 0.91 (0.88–0.93) | <0.0001 | 0.84 (0.82–0.86)             | <0.0001 | 0.91 (0.88–0.94)                               | <0.0001 |
|             | 2 - Medium ( $>25$ to $<75$ th pctl) | 153,022.0    | 18,845                 | 12.3              | 1.00 (Reference) |         | 1.00 (Reference)             |         | 1.00 (Reference)                               |         |
|             | 3 - High ( $\geq$ 75th pctl)         | 65,811.5     | 12,818                 | 19.5              | 1.52 (1.48–1.55) | <0.0001 | 1.55 (1.52–1.59)             | <0.0001 | 1.23 (1.20–1.26)                               | <0.0001 |
| Colon       | 1 - Low ( $\leq$ 25th pctl)          | 13,656.9     | 926                    | 6.8               | 0.70 (0.65–0.76) | <0.0001 | 0.69 (0.64–0.75)             | <0.0001 | 0.92 (0.84–0.99)                               | 0.0334  |
|             | 2 - Medium ( $>25$ to $<75$ th pctl) | 26,021.7     | 2,510                  | 9.6               | 1.00 (Reference) |         | 1.00 (Reference)             |         | 1.00 (Reference)                               |         |
|             | 3 - High ( $\geq$ 75th pctl)         | 10,913.0     | 1,884                  | 17.3              | 1.70 (1.60–1.80) | <0.0001 | 1.71 (1.61–1.81)             | <0.0001 | 1.32 (1.24–1.40)                               | <0.0001 |
| Lung        | 1 - Low ( $\leq$ 25th pctl)          | 8,415.3      | 2,798                  | 33.2              | 0.80 (0.77–0.84) | <0.0001 | 0.75 (0.72–0.79)             | <0.0001 | 0.93 (0.89–0.97)                               | 0.0024  |
|             | 2 - Medium ( $>25$ to $<75$ th pctl) | 14,959.1     | 6,504                  | 43.5              | 1.00 (Reference) |         | 1.00 (Reference)             |         | 1.00 (Reference)                               |         |
|             | 3 - High ( $\geq$ 75th pctl)         | 4,977.9      | 3,872                  | 77.8              | 1.55 (1.48–1.61) | <0.0001 | 1.57 (1.51–1.63)             | <0.0001 | 1.35 (1.29–1.40)                               | <0.0001 |
| Breast      | 1 - Low ( $\leq$ 25th pctl)          | 9,436.4      | 298                    | 3.2               | 1.19 (1.03–1.37) | 0.0193  | 1.05 (0.91–1.21)             | 0.5042  | 1.11 (0.96–1.30)                               | 0.1654  |
|             | 2 - Medium ( $>25$ to $<75$ th pctl) | 19,744.7     | 516                    | 2.6               | 1.00 (Reference) |         | 1.00 (Reference)             |         | 1.00 (Reference)                               |         |
|             | 3 - High ( $\geq$ 75th pctl)         | 9,377.9      | 428                    | 4.6               | 1.73 (1.52–1.97) | <0.0001 | 1.80 (1.58–2.04)             | <0.0001 | 1.23 (1.07–1.41)                               | 0.0028  |
| Prostate    | 1 - Low ( $\leq$ 25th pctl)          | 7,499.3      | 365                    | 4.9               | 1.66 (1.45–1.90) | <0.0001 | 1.39 (1.21–1.60)             | <0.0001 | 1.30 (1.11–1.51)                               | 0.0009  |
|             | 2 - Medium ( $>25$ to $<75$ th pctl) | 16,960.5     | 474                    | 2.8               | 1.00 (Reference) |         | 1.00 (Reference)             |         | 1.00 (Reference)                               |         |
|             | 3 - High ( $\geq$ 75th pctl)         | 8,034.9      | 434                    | 5.4               | 1.91 (1.68–2.17) | <0.0001 | 1.87 (1.64–2.13)             | <0.0001 | 1.39 (1.21–1.61)                               | <0.0001 |
| Ovary       | 1 - Low ( $\leq$ 25th pctl)          | 2,161.7      | 226                    | 10.5              | 0.65 (0.56–0.76) | <0.0001 | 0.63 (0.54–0.74)             | <0.0001 | 0.78 (0.64–0.95)                               | 0.0143  |
|             | 2 - Medium ( $>25$ to $<75$ th pctl) | 4,017.9      | 650                    | 16.2              | 1.00 (Reference) |         | 1.00 (Reference)             |         | 1.00 (Reference)                               |         |
|             | 3 - High ( $\geq$ 75th pctl)         | 1,699.2      | 459                    | 27.0              | 1.60 (1.42–1.80) | <0.0001 | 1.60 (1.42–1.81)             | <0.0001 | 1.27 (1.10–1.48)                               | 0.0016  |
| Stomach     | 1 - Low ( $\leq$ 25th pctl)          | 1,441.4      | 478                    | 33.2              | 0.88 (0.79–0.99) | 0.0265  | 0.87 (0.78–0.97)             | 0.0111  | 1.08 (0.91–1.28)                               | 0.3949  |
|             | 2 - Medium ( $>25$ to $<75$ th pctl) | 2,745.4      | 1,035                  | 37.7              | 1.00 (Reference) |         | 1.00 (Reference)             |         | 1.00 (Reference)                               |         |
|             | 3 - High ( $\geq$ 75th pctl)         | 1,191.1      | 574                    | 48.2              | 1.25 (1.13–1.38) | <0.0001 | 1.23 (1.11–1.36)             | 0.0001  | 1.03 (0.88–1.21)                               | 0.6992  |
| Pancreas    | 1 - Low ( $\leq$ 25th pctl)          | 1,133.3      | 1,060                  | 93.5              | 1.12 (1.04–1.20) | 0.0033  | 1.08 (1.00–1.16)             | 0.0542  | 0.94 (0.84–1.05)                               | 0.3046  |
|             | 2 - Medium ( $>25$ to $<75$ th pctl) | 2,581.5      | 2,028                  | 78.6              | 1.00 (Reference) |         | 1.00 (Reference)             |         | 1.00 (Reference)                               |         |

|             |                                      |          |       |       |                   |         |                   |         |                   |         |
|-------------|--------------------------------------|----------|-------|-------|-------------------|---------|-------------------|---------|-------------------|---------|
| Kidney      | 3 - High ( $\geq 75$ th pctl)        | 1,084.5  | 1,104 | 101.8 | 1.26 (1.17–1.35)  | <0.0001 | 1.27 (1.18–1.37)  | <0.0001 | 1.23 (1.10–1.37)  | 0.0002  |
|             | 1 - Low ( $\leq 25$ th pctl)         | 4,253.6  | 157   | 3.7   | 0.89 (0.74–1.08)  | 0.2417  | 0.76 (0.63–0.92)  | 0.005   | 0.83 (0.63–1.10)  | 0.1919  |
|             | 2 - Medium ( $>25$ to $<75$ th pctl) | 8,437.8  | 346   | 4.1   | 1.00 (Reference)  |         | 1.00 (Reference)  |         | 1.00 (Reference)  |         |
| Bladder     | 3 - High ( $\geq 75$ th pctl)        | 3,212.7  | 533   | 16.6  | 3.79 (3.31–4.34)  | <0.0001 | 3.72 (3.25–4.27)  | <0.0001 | 1.64 (1.36–1.98)  | <0.0001 |
|             | 1 - Low ( $\leq 25$ th pctl)         | 5,285.2  | 230   | 4.4   | 1.03 (0.88–1.20)  | 0.7431  | 0.88 (0.75–1.03)  | 0.122   | 0.72 (0.55–0.94)  | 0.0159  |
|             | 2 - Medium ( $>25$ to $<75$ th pctl) | 10,633.9 | 446   | 4.2   | 1.00 (Reference)  |         | 1.00 (Reference)  |         | 1.00 (Reference)  |         |
| Esophagus   | 3 - High ( $\geq 75$ th pctl)        | 4,677.0  | 477   | 10.2  | 2.41 (2.12–2.75)  | <0.0001 | 2.46 (2.16–2.80)  | <0.0001 | 1.29 (1.05–1.59)  | 0.0166  |
|             | 1 - Low ( $\leq 25$ th pctl)         | 478.8    | 264   | 55.1  | 1.02 (0.88–1.19)  | 0.7678  | 0.99 (0.85–1.15)  | 0.8641  | 0.99 (0.80–1.22)  | 0.9321  |
|             | 2 - Medium ( $>25$ to $<75$ th pctl) | 962.8    | 516   | 53.6  | 1.00 (Reference)  |         | 1.00 (Reference)  |         | 1.00 (Reference)  |         |
| Other GI    | 3 - High ( $\geq 75$ th pctl)        | 363.9    | 292   | 80.3  | 1.45 (1.26–1.68)  | <0.0001 | 1.49 (1.29–1.72)  | <0.0001 | 1.09 (0.89–1.32)  | 0.4196  |
|             | 1 - Low ( $\leq 25$ th pctl)         | 985.7    | 132   | 13.4  | 0.94 (0.76–1.15)  | 0.5527  | 0.89 (0.72–1.09)  | 0.2591  | 0.75 (0.53–1.06)  | 0.108   |
|             | 2 - Medium ( $>25$ to $<75$ th pctl) | 2,127.7  | 291   | 13.7  | 1.00 (Reference)  |         | 1.00 (Reference)  |         | 1.00 (Reference)  |         |
| Thyroid     | 3 - High ( $\geq 75$ th pctl)        | 837.9    | 217   | 25.9  | 1.77 (1.48–2.11)  | <0.0001 | 1.84 (1.54–2.19)  | <0.0001 | 1.79 (1.35–2.37)  | <0.0001 |
|             | 1 - Low ( $\leq 25$ th pctl)         | 5,984.2  | 24    | 0.4   | 1.25 (0.75–2.09)  | 0.3856  | 1.06 (0.63–1.77)  | 0.8212  | 0.50 (0.21–1.18)  | 0.1135  |
|             | 2 - Medium ( $>25$ to $<75$ th pctl) | 12,113.1 | 38    | 0.3   | 1.00 (Reference)  |         | 1.00 (Reference)  |         | 1.00 (Reference)  |         |
| Cervix      | 3 - High ( $\geq 75$ th pctl)        | 6,172.7  | 48    | 0.8   | 2.49 (1.63–3.82)  | <0.0001 | 3.31 (2.15–5.10)  | <0.0001 | 1.27 (0.74–2.19)  | 0.3913  |
|             | 1 - Low ( $\leq 25$ th pctl)         | 748.2    | 32    | 4.3   | 0.58 (0.39–0.86)  | 0.0065  | 0.50 (0.33–0.75)  | 0.0007  | 0.73 (0.47–1.14)  | 0.168   |
|             | 2 - Medium ( $>25$ to $<75$ th pctl) | 1,346.7  | 100   | 7.4   | 1.00 (Reference)  |         | 1.00 (Reference)  |         | 1.00 (Reference)  |         |
| Testis      | 3 - High ( $\geq 75$ th pctl)        | 535.7    | 110   | 20.5  | 2.61 (1.99–3.42)  | <0.0001 | 2.63 (2.00–3.46)  | <0.0001 | 1.88 (1.40–2.53)  | <0.0001 |
|             | 1 - Low ( $\leq 25$ th pctl)         | *SS*     | *SS*  | 0.3   | 0.97 (0.24–3.86)  | 0.9607  | 0.69 (0.17–2.88)  | 0.6135  | 1.47 (0.13–16.20) | 0.7513  |
|             | 2 - Medium ( $>25$ to $<75$ th pctl) | *SS*     | *SS*  | 0.3   | 1.00 (Reference)  |         | 1.00 (Reference)  |         | 1.00 (Reference)  |         |
| Endometrium | 3 - High ( $\geq 75$ th pctl)        | *SS*     | *SS*  | 1.5   | 4.76 (1.83–12.39) | 0.0014  | 4.92 (1.83–13.25) | 0.0016  | 1.52 (0.46–5.04)  | 0.4895  |
|             | 1 - Low ( $\leq 25$ th pctl)         | 3,988.2  | 135   | 3.4   | 1.13 (0.91–1.40)  | 0.2571  | 0.94 (0.76–1.16)  | 0.5428  | 1.18 (0.92–1.52)  | 0.2011  |
|             | 2 - Medium ( $>25$ to $<75$ th pctl) | 7,996.6  | 239   | 3.0   | 1.00 (Reference)  |         | 1.00 (Reference)  |         | 1.00 (Reference)  |         |
| Brain       | 3 - High ( $\geq 75$ th pctl)        | 3,496.7  | 259   | 7.4   | 2.42 (2.03–2.89)  | <0.0001 | 2.69 (2.25–3.21)  | <0.0001 | 1.91 (1.53–2.38)  | <0.0001 |
|             | 1 - Low ( $\leq 25$ th pctl)         | 868.5    | 468   | 53.9  | 1.11 (0.99–1.24)  | 0.074   | 0.91 (0.81–1.02)  | 0.1236  | NA                |         |
|             | 2 - Medium ( $>25$ to $<75$ th pctl) | 1,910.8  | 887   | 46.4  | 1.00 (Reference)  |         | 1.00 (Reference)  |         | NA                |         |
| Melanoma    | 3 - High ( $\geq 75$ th pctl)        | 1,038.2  | 461   | 44.4  | 1.01 (0.90–1.13)  | 0.9181  | 1.05 (0.94–1.18)  | 0.3669  | NA                |         |
|             | 1 - Low ( $\leq 25$ th pctl)         | 2,672.7  | 86    | 3.2   | 0.99 (0.76–1.28)  | 0.9398  | 0.90 (0.69–1.17)  | 0.434   | 0.79 (0.56–1.12)  | 0.1815  |

|                         |                                   |         |       |      |                  |         |                  |         |                  |         |
|-------------------------|-----------------------------------|---------|-------|------|------------------|---------|------------------|---------|------------------|---------|
|                         | 2 - Medium (>25 to <75th<br>pctl) | 5,219.7 | 170   | 3.3  | 1.00 (Reference) |         | 1.00 (Reference) |         | 1.00 (Reference) |         |
|                         | 3 - High (≥75th pctl)             | 2,421.2 | 168   | 6.9  | 2.16 (1.74–2.67) | <0.0001 | 2.25 (1.82–2.79) | <0.0001 | 1.30 (0.99–1.72) | 0.0627  |
| Head and neck           | 1 - Low (≤25th pctl)              | 2,394.6 | 129   | 5.4  | 0.91 (0.74–1.12) | 0.3731  | 0.79 (0.64–0.98) | 0.0303  | 0.91 (0.72–1.16) | 0.4479  |
|                         | 2 - Medium (>25 to <75th<br>pctl) | 5,158.0 | 291   | 5.6  | 1.00 (Reference) |         | 1.00 (Reference) |         | 1.00 (Reference) |         |
|                         | 3 - High (≥75th pctl)             | 2,154.6 | 222   | 10.3 | 1.73 (1.46–2.06) | <0.0001 | 1.79 (1.50–2.13) | <0.0001 | 1.52 (1.24–1.86) | <0.0001 |
|                         | 1 - Low (≤25th pctl)              | 4,023.6 | 855   | 21.2 | 0.96 (0.88–1.04) | 0.2931  | 0.86 (0.80–0.94) | 0.0005  | 0.92 (0.77–1.09) | 0.331   |
| Other solid tu-<br>mour | 2 - Medium (>25 to <75th<br>pctl) | 8,195.0 | 1,798 | 21.9 | 1.00 (Reference) |         | 1.00 (Reference) |         | 1.00 (Reference) |         |
|                         | 3 - High (≥75th pctl)             | 2,661.3 | 1,262 | 47.4 | 1.79 (1.67–1.92) | <0.0001 | 1.78 (1.66–1.92) | <0.0001 | 1.31 (1.12–1.53) | 0.0008  |

HR = Hazard ratio; pctl = percentile; NA = Not applicable; \*SS\* = data suppressed due to small number of observations/events. \* Adjusted for age at diagnosis (cat.), year of diagnosis (cont.), and common chronic conditions (asthma, congestive heart failure, chronic obstructive pulmonary disease, hypertension, and diabetes). \*\* Adjusted for age at diagnosis (cat.), year of diagnosis (cont.), common chronic conditions (asthma, congestive heart failure, chronic obstructive pulmonary disease, hypertension, and diabetes), and cancer stage. Only subjects with known cancer stage were included.

**Table S12.** Cancer-specific mortality rates and hazard ratios by baseline platelet count category (exposure definition 2), for all cancers.

| Cancer | Platelet category                 | Person-<br>years | Cancer-<br>specific<br>deaths | Rate (%<br>per year) | Unadjusted       |         | Patient variable adjust-<br>ment* |         | Patient variable and can-<br>cer stage adjustment** |         |
|--------|-----------------------------------|------------------|-------------------------------|----------------------|------------------|---------|-----------------------------------|---------|-----------------------------------------------------|---------|
|        |                                   |                  |                               |                      | HR (95% CI)      | P-value | HR (95% CI)                       | P-value | HR (95% CI)                                         | P-value |
| All    | 1 - Very low (≤10th pctl)         | 29,043.6         | 3,624                         | 12.5                 | 0.97 (0.94–1.01) | 0.1193  | 0.86 (0.83–0.90)                  | <0.0001 | 0.94 (0.90–0.98)                                    | 0.0064  |
|        | 2 - Low (>10 to ≤25th pctl)       | 47,382.2         | 5,042                         | 10.6                 | 0.86 (0.84–0.89) | <0.0001 | 0.82 (0.79–0.84)                  | <0.0001 | 0.90 (0.86–0.93)                                    | <0.0001 |
|        | 3 - Medium (>25 to <75th<br>pctl) | 153,022.0        | 18,845                        | 12.3                 | 1.00 (Reference) |         | 1.00 (Reference)                  |         | 1.00 (Reference)                                    |         |
|        | 4 - High (≥75 to <90th pctl)      | 41,977.2         | 7,129                         | 17.0                 | 1.35 (1.31–1.39) | <0.0001 | 1.38 (1.34–1.42)                  | <0.0001 | 1.19 (1.16–1.23)                                    | <0.0001 |
|        | 5 - Very high (≥90th pctl)        | 23,834.3         | 5,689                         | 23.9                 | 1.79 (1.74–1.85) | <0.0001 | 1.84 (1.79–1.90)                  | <0.0001 | 1.28 (1.23–1.33)                                    | <0.0001 |
| Colon  | 1 - Very low (≤10th pctl)         | 5,313.0          | 362                           | 6.8                  | 0.70 (0.63–0.78) | <0.0001 | 0.67 (0.60–0.75)                  | <0.0001 | 0.92 (0.81–1.04)                                    | 0.1619  |
|        | 2 - Low (>10 to ≤25th pctl)       | 8,343.8          | 564                           | 6.8                  | 0.70 (0.64–0.77) | <0.0001 | 0.71 (0.64–0.77)                  | <0.0001 | 0.91 (0.83–1.01)                                    | 0.0672  |
|        | 3 - Medium (>25 to <75th<br>pctl) | 26,021.7         | 2,510                         | 9.6                  | 1.00 (Reference) |         | 1.00 (Reference)                  |         | 1.00 (Reference)                                    |         |
|        | 4 - High (≥75 to <90th pctl)      | 6,899.5          | 1,046                         | 15.2                 | 1.51 (1.41–1.63) | <0.0001 | 1.51 (1.40–1.62)                  | <0.0001 | 1.24 (1.15–1.34)                                    | <0.0001 |
|        | 5 - Very high (≥90th pctl)        | 4,013.5          | 838                           | 20.9                 | 2.01 (1.86–2.17) | <0.0001 | 2.06 (1.90–2.22)                  | <0.0001 | 1.44 (1.32–1.56)                                    | <0.0001 |
| Lung   | 1 - Very low (≤10th pctl)         | 3,126.0          | 1,149                         | 36.8                 | 0.87 (0.82–0.92) | <0.0001 | 0.79 (0.74–0.84)                  | <0.0001 | 1.02 (0.95–1.09)                                    | 0.6681  |
|        | 2 - Low (>10 to ≤25th pctl)       | 5,289.3          | 1,649                         | 31.2                 | 0.76 (0.72–0.80) | <0.0001 | 0.73 (0.69–0.77)                  | <0.0001 | 0.88 (0.83–0.93)                                    | <0.0001 |
|        | 3 - Medium (>25 to <75th<br>pctl) | 14,959.1         | 6,504                         | 43.5                 | 1.00 (Reference) |         | 1.00 (Reference)                  |         | 1.00 (Reference)                                    |         |

|          |                                         |          |       |       |                  |         |                  |         |                  |         |
|----------|-----------------------------------------|----------|-------|-------|------------------|---------|------------------|---------|------------------|---------|
|          | 4 - High ( $\geq 75$ to $< 90$ th pctl) | 3,220.3  | 2,282 | 70.9  | 1.44 (1.37–1.51) | <0.0001 | 1.45 (1.39–1.53) | <0.0001 | 1.29 (1.23–1.35) | <0.0001 |
|          | 5 - Very high ( $\geq 90$ th pctl)      | 1,757.6  | 1,590 | 90.5  | 1.73 (1.64–1.83) | <0.0001 | 1.78 (1.68–1.88) | <0.0001 | 1.44 (1.36–1.53) | <0.0001 |
| Breast   | 1 - Very low ( $\leq 10$ th pctl)       | 3,556.0  | 154   | 4.3   | 1.60 (1.34–1.91) | <0.0001 | 1.39 (1.16–1.67) | 0.0003  | 1.27 (1.04–1.54) | 0.018   |
|          | 2 - Low ( $> 10$ to $\leq 25$ th pctl)  | 5,880.4  | 144   | 2.4   | 0.93 (0.77–1.12) | 0.4298  | 0.83 (0.69–1.00) | 0.0545  | 0.99 (0.81–1.21) | 0.9388  |
|          | 3 - Medium ( $> 25$ to $< 75$ th pctl)  | 19,744.7 | 516   | 2.6   | 1.00 (Reference) |         | 1.00 (Reference) |         | 1.00 (Reference) |         |
|          | 4 - High ( $\geq 75$ to $< 90$ th pctl) | 5,853.6  | 207   | 3.5   | 1.35 (1.14–1.58) | 0.0003  | 1.41 (1.20–1.66) | <0.0001 | 1.17 (0.98–1.38) | 0.0788  |
|          | 5 - Very high ( $\geq 90$ th pctl)      | 3,524.2  | 221   | 6.3   | 2.36 (2.01–2.76) | <0.0001 | 2.42 (2.06–2.83) | <0.0001 | 1.30 (1.10–1.54) | 0.0021  |
| Prostate | 1 - Very low ( $\leq 10$ th pctl)       | 2,792.8  | 189   | 6.8   | 2.24 (1.89–2.65) | <0.0001 | 1.76 (1.49–2.09) | <0.0001 | 1.44 (1.18–1.75) | 0.0003  |
|          | 2 - Low ( $> 10$ to $\leq 25$ th pctl)  | 4,706.4  | 176   | 3.7   | 1.30 (1.09–1.54) | 0.003   | 1.14 (0.96–1.36) | 0.1392  | 1.19 (0.98–1.44) | 0.073   |
|          | 3 - Medium ( $> 25$ to $< 75$ th pctl)  | 16,960.5 | 474   | 2.8   | 1.00 (Reference) |         | 1.00 (Reference) |         | 1.00 (Reference) |         |
|          | 4 - High ( $\geq 75$ to $< 90$ th pctl) | 5,113.0  | 213   | 4.2   | 1.50 (1.28–1.76) | <0.0001 | 1.50 (1.28–1.77) | <0.0001 | 1.25 (1.05–1.49) | 0.0141  |
|          | 5 - Very high ( $\geq 90$ th pctl)      | 2,921.9  | 221   | 7.6   | 2.59 (2.21–3.04) | <0.0001 | 2.43 (2.07–2.85) | <0.0001 | 1.58 (1.32–1.89) | <0.0001 |
| Ovary    | 1 - Very low ( $\leq 10$ th pctl)       | 826.6    | 90    | 10.9  | 0.66 (0.53–0.82) | 0.0002  | 0.58 (0.46–0.72) | <0.0001 | 0.78 (0.57–1.06) | 0.1063  |
|          | 2 - Low ( $> 10$ to $\leq 25$ th pctl)  | 1,335.1  | 136   | 10.2  | 0.65 (0.54–0.78) | <0.0001 | 0.68 (0.56–0.82) | <0.0001 | 0.78 (0.61–0.99) | 0.0407  |
|          | 3 - Medium ( $> 25$ to $< 75$ th pctl)  | 4,017.9  | 650   | 16.2  | 1.00 (Reference) |         | 1.00 (Reference) |         | 1.00 (Reference) |         |
|          | 4 - High ( $\geq 75$ to $< 90$ th pctl) | 1,035.6  | 271   | 26.2  | 1.55 (1.34–1.79) | <0.0001 | 1.55 (1.34–1.79) | <0.0001 | 1.29 (1.08–1.53) | 0.0053  |
|          | 5 - Very high ( $\geq 90$ th pctl)      | 663.6    | 188   | 28.3  | 1.67 (1.42–1.97) | <0.0001 | 1.69 (1.44–2.00) | <0.0001 | 1.25 (1.03–1.53) | 0.0268  |
| Stomach  | 1 - Very low ( $\leq 10$ th pctl)       | 554.7    | 188   | 33.9  | 0.89 (0.76–1.04) | 0.1543  | 0.87 (0.74–1.01) | 0.0736  | 1.02 (0.79–1.33) | 0.8614  |
|          | 2 - Low ( $> 10$ to $\leq 25$ th pctl)  | 886.7    | 290   | 32.7  | 0.88 (0.77–1.00) | 0.0522  | 0.87 (0.76–0.99) | 0.0353  | 1.11 (0.91–1.37) | 0.3003  |
|          | 3 - Medium ( $> 25$ to $< 75$ th pctl)  | 2,745.4  | 1,035 | 37.7  | 1.00 (Reference) |         | 1.00 (Reference) |         | 1.00 (Reference) |         |
|          | 4 - High ( $\geq 75$ to $< 90$ th pctl) | 734.9    | 338   | 46.0  | 1.19 (1.05–1.34) | 0.0061  | 1.16 (1.02–1.31) | 0.0199  | 1.11 (0.92–1.35) | 0.2836  |
|          | 5 - Very high ( $\geq 90$ th pctl)      | 456.2    | 236   | 51.7  | 1.35 (1.17–1.55) | <0.0001 | 1.34 (1.16–1.54) | <0.0001 | 0.93 (0.75–1.17) | 0.5454  |
| Pancreas | 1 - Very low ( $\leq 10$ th pctl)       | 445.9    | 424   | 95.1  | 1.15 (1.04–1.28) | 0.009   | 1.07 (0.97–1.19) | 0.1868  | 0.89 (0.76–1.05) | 0.1731  |
|          | 2 - Low ( $> 10$ to $\leq 25$ th pctl)  | 687.3    | 636   | 92.5  | 1.10 (1.00–1.20) | 0.0398  | 1.08 (0.99–1.18) | 0.1019  | 0.97 (0.85–1.11) | 0.7063  |
|          | 3 - Medium ( $> 25$ to $< 75$ th pctl)  | 2,581.5  | 2,028 | 78.6  | 1.00 (Reference) |         | 1.00 (Reference) |         | 1.00 (Reference) |         |
|          | 4 - High ( $\geq 75$ to $< 90$ th pctl) | 710.0    | 642   | 90.4  | 1.16 (1.06–1.26) | 0.0013  | 1.16 (1.06–1.26) | 0.0013  | 1.15 (1.01–1.31) | 0.0408  |
|          | 5 - Very high ( $\geq 90$ th pctl)      | 374.5    | 462   | 123.4 | 1.43 (1.29–1.58) | <0.0001 | 1.47 (1.33–1.63) | <0.0001 | 1.40 (1.19–1.64) | <0.0001 |
| Kidney   | 1 - Very low ( $\leq 10$ th pctl)       | 1,685.5  | 72    | 4.3   | 1.03 (0.80–1.32) | 0.834   | 0.84 (0.65–1.08) | 0.1777  | 1.03 (0.69–1.55) | 0.8689  |
|          | 2 - Low ( $> 10$ to $\leq 25$ th pctl)  | 2,568.0  | 85    | 3.3   | 0.80 (0.63–1.02) | 0.0725  | 0.71 (0.56–0.90) | 0.0046  | 0.74 (0.53–1.03) | 0.0753  |
|          | 3 - Medium ( $> 25$ to $< 75$ th pctl)  | 8,437.8  | 346   | 4.1   | 1.00 (Reference) |         | 1.00 (Reference) |         | 1.00 (Reference) |         |
|          | 4 - High ( $\geq 75$ to $< 90$ th pctl) | 2,202.3  | 233   | 10.6  | 2.51 (2.13–2.97) | <0.0001 | 2.51 (2.13–2.97) | <0.0001 | 1.39 (1.11–1.76) | 0.0046  |
|          | 5 - Very high ( $\geq 90$ th pctl)      | 1,010.5  | 300   | 29.7  | 6.30 (5.40–7.36) | <0.0001 | 6.03 (5.16–7.05) | <0.0001 | 1.89 (1.53–2.35) | <0.0001 |

|             |                                        |          |      |      |                   |           |                    |           |                   |           |
|-------------|----------------------------------------|----------|------|------|-------------------|-----------|--------------------|-----------|-------------------|-----------|
| Bladder     | 1 - Very low ( $\leq 10$ th pctl)      | 2,049.9  | 98   | 4.8  | 1.11 (0.89–1.38)  | 0.3672    | 0.90 (0.72–1.12)   | 0.3265    | 0.64 (0.42–0.98)  | 0.0409    |
|             | 2 - Low ( $>10$ to $\leq 25$ th pctl)  | 3,235.3  | 132  | 4.1  | 0.98 (0.80–1.18)  | 0.8016    | 0.87 (0.72–1.06)   | 0.1676    | 0.76 (0.55–1.04)  | 0.0831    |
|             | 3 - Medium ( $>25$ to $<75$ th pctl)   | 10,633.9 | 446  | 4.2  | 1.00 (Reference)  |           | 1.00 (Reference)   |           | 1.00 (Reference)  |           |
|             | 4 - High ( $\geq 75$ to $<90$ th pctl) | 3,046.2  | 231  | 7.6  | 1.83 (1.56–2.14)  | $<0.0001$ | 1.90 (1.62–2.23)   | $<0.0001$ | 1.13 (0.87–1.46)  | 0.3501    |
|             | 5 - Very high ( $\geq 90$ th pctl)     | 1,630.8  | 246  | 15.1 | 3.46 (2.96–4.04)  | $<0.0001$ | 3.41 (2.91–3.99)   | $<0.0001$ | 1.47 (1.15–1.88)  | 0.0022    |
| Esophagus   | 1 - Very low ( $\leq 10$ th pctl)      | 173.3    | 102  | 58.9 | 1.03 (0.83–1.28)  | 0.7762    | 0.98 (0.79–1.21)   | 0.8322    | 0.96 (0.70–1.32)  | 0.783     |
|             | 2 - Low ( $>10$ to $\leq 25$ th pctl)  | 305.5    | 162  | 53.0 | 1.02 (0.85–1.21)  | 0.85      | 0.99 (0.83–1.19)   | 0.9338    | 1.01 (0.79–1.29)  | 0.9368    |
|             | 3 - Medium ( $>25$ to $<75$ th pctl)   | 962.8    | 516  | 53.6 | 1.00 (Reference)  |           | 1.00 (Reference)   |           | 1.00 (Reference)  |           |
|             | 4 - High ( $\geq 75$ to $<90$ th pctl) | 220.3    | 167  | 75.8 | 1.35 (1.13–1.60)  | 0.0009    | 1.36 (1.14–1.62)   | 0.0007    | 1.09 (0.86–1.37)  | 0.4916    |
|             | 5 - Very high ( $\geq 90$ th pctl)     | 143.5    | 125  | 87.1 | 1.63 (1.34–1.98)  | $<0.0001$ | 1.71 (1.40–2.08)   | $<0.0001$ | 1.09 (0.81–1.45)  | 0.5746    |
| Other GI    | 1 - Very low ( $\leq 10$ th pctl)      | 358.5    | 58   | 16.2 | 1.10 (0.83–1.45)  | 0.5182    | 1.05 (0.79–1.39)   | 0.7385    | 0.96 (0.60–1.53)  | 0.8502    |
|             | 2 - Low ( $>10$ to $\leq 25$ th pctl)  | 627.2    | 74   | 11.8 | 0.84 (0.65–1.09)  | 0.1944    | 0.79 (0.61–1.02)   | 0.0745    | 0.63 (0.40–0.98)  | 0.0425    |
|             | 3 - Medium ( $>25$ to $<75$ th pctl)   | 2,127.7  | 291  | 13.7 | 1.00 (Reference)  |           | 1.00 (Reference)   |           | 1.00 (Reference)  |           |
|             | 4 - High ( $\geq 75$ to $<90$ th pctl) | 543.7    | 114  | 21.0 | 1.46 (1.18–1.82)  | 0.0006    | 1.53 (1.23–1.90)   | 0.0001    | 1.58 (1.13–2.22)  | 0.0077    |
|             | 5 - Very high ( $\geq 90$ th pctl)     | 294.2    | 103  | 35.0 | 2.31 (1.84–2.89)  | $<0.0001$ | 2.37 (1.89–2.97)   | $<0.0001$ | 2.15 (1.49–3.12)  | $<0.0001$ |
| Thyroid     | 1 - Very low ( $\leq 10$ th pctl)      | 2,307.3  | 13   | 0.6  | 1.71 (0.91–3.21)  | 0.0959    | 1.27 (0.68–2.40)   | 0.455     | 0.39 (0.14–1.09)  | 0.0733    |
|             | 2 - Low ( $>10$ to $\leq 25$ th pctl)  | 3,676.9  | 11   | 0.3  | 0.95 (0.49–1.87)  | 0.8914    | 0.88 (0.45–1.72)   | 0.7062    | 0.74 (0.24–2.34)  | 0.6129    |
|             | 3 - Medium ( $>25$ to $<75$ th pctl)   | 12,113.1 | 38   | 0.3  | 1.00 (Reference)  |           | 1.00 (Reference)   |           | 1.00 (Reference)  |           |
|             | 4 - High ( $\geq 75$ to $<90$ th pctl) | 3,818.5  | 15   | 0.4  | 1.28 (0.71–2.33)  | 0.4138    | 1.80 (0.99–3.29)   | 0.056     | 1.09 (0.50–2.36)  | 0.8242    |
|             | 5 - Very high ( $\geq 90$ th pctl)     | 2,354.2  | 33   | 1.4  | 4.37 (2.74–6.97)  | $<0.0001$ | 5.37 (3.33–8.68)   | $<0.0001$ | 1.38 (0.75–2.54)  | 0.2969    |
| Cervix      | 1 - Very low ( $\leq 10$ th pctl)      | 299.6    | 14   | 4.7  | 0.63 (0.36–1.10)  | 0.1028    | 0.49 (0.28–0.87)   | 0.0155    | 0.68 (0.37–1.26)  | 0.219     |
|             | 2 - Low ( $>10$ to $\leq 25$ th pctl)  | 448.6    | 18   | 4.0  | 0.54 (0.33–0.89)  | 0.0163    | 0.50 (0.30–0.83)   | 0.0069    | 0.78 (0.45–1.36)  | 0.3781    |
|             | 3 - Medium ( $>25$ to $<75$ th pctl)   | 1,346.7  | 100  | 7.4  | 1.00 (Reference)  |           | 1.00 (Reference)   |           | 1.00 (Reference)  |           |
|             | 4 - High ( $\geq 75$ to $<90$ th pctl) | 358.0    | 64   | 17.9 | 2.37 (1.73–3.24)  | $<0.0001$ | 2.28 (1.66–3.13)   | $<0.0001$ | 1.81 (1.29–2.55)  | 0.0006    |
|             | 5 - Very high ( $\geq 90$ th pctl)     | 177.7    | 46   | 25.9 | 3.04 (2.14–4.32)  | $<0.0001$ | 3.38 (2.36–4.85)   | $<0.0001$ | 1.99 (1.35–2.94)  | 0.0006    |
| Testis      | 1 - Very low ( $\leq 10$ th pctl)      | *SS*     | *SS* | 0.6  | 1.66 (0.33–8.21)  | 0.5361    | 0.95 (0.17–5.41)   | 0.9547    | 2.40 (0.23–25.37) | 0.4675    |
|             | 2 - Low ( $>10$ to $\leq 25$ th pctl)  | *SS*     | *SS* | 0.2  | 0.53 (0.06–4.37)  | 0.5515    | 0.39 (0.05–3.35)   | 0.3933    | NA                |           |
|             | 3 - Medium ( $>25$ to $<75$ th pctl)   | 1,889.0  | 6    | 0.3  | 1.00 (Reference)  |           | 1.00 (Reference)   |           | 1.00 (Reference)  |           |
|             | 4 - High ( $\geq 75$ to $<90$ th pctl) | *SS*     | *SS* | 0.6  | 2.19 (0.62–7.76)  | 0.2248    | 1.93 (0.51–7.23)   | 0.3315    | 0.55 (0.09–3.18)  | 0.5006    |
|             | 5 - Very high ( $\geq 90$ th pctl)     | 327.4    | 10   | 3.1  | 8.97 (3.26–24.69) | $<0.0001$ | 11.23 (3.84–32.88) | $<0.0001$ | 2.74 (0.79–9.43)  | 0.1105    |
| Endometrium | 1 - Very low ( $\leq 10$ th pctl)      | 1,595.4  | 62   | 3.9  | 1.27 (0.96–1.68)  | 0.0964    | 0.96 (0.72–1.27)   | 0.7744    | 1.31 (0.94–1.84)  | 0.1138    |
|             | 2 - Low ( $>10$ to $\leq 25$ th pctl)  | 2,392.7  | 73   | 3.1  | 1.03 (0.80–1.34)  | 0.8005    | 0.91 (0.70–1.19)   | 0.4891    | 1.09 (0.80–1.49)  | 0.5826    |

|                         |                                   |         |       |      |                  |         |                  |         |                  |         |
|-------------------------|-----------------------------------|---------|-------|------|------------------|---------|------------------|---------|------------------|---------|
|                         | 3 - Medium (>25 to <75th<br>pctl) | 7,996.6 | 239   | 3.0  | 1.00 (Reference) |         | 1.00 (Reference) |         | 1.00 (Reference) |         |
|                         | 4 - High (≥75 to <90th pctl)      | 2,272.1 | 117   | 5.1  | 1.71 (1.37–2.13) | <0.0001 | 1.80 (1.44–2.25) | <0.0001 | 1.79 (1.37–2.34) | <0.0001 |
|                         | 5 - Very high (≥90th pctl)        | 1,224.6 | 142   | 11.6 | 3.71 (3.02–4.57) | <0.0001 | 4.62 (3.74–5.71) | <0.0001 | 2.04 (1.56–2.68) | <0.0001 |
| Brain                   | 1 - Very low (≤10th pctl)         | 331.1   | 188   | 56.8 | 1.15 (0.98–1.35) | 0.0803  | 0.83 (0.70–0.97) | 0.0204  | NA               |         |
|                         | 2 - Low (>10 to ≤25th pctl)       | 537.3   | 280   | 52.1 | 1.08 (0.94–1.24) | 0.2603  | 0.98 (0.86–1.12) | 0.767   | NA               |         |
|                         | 3 - Medium (>25 to <75th<br>pctl) | 1,910.8 | 887   | 46.4 | 1.00 (Reference) |         | 1.00 (Reference) |         | NA               |         |
|                         | 4 - High (≥75 to <90th pctl)      | 630.0   | 276   | 43.8 | 0.99 (0.87–1.14) | 0.9201  | 1.05 (0.91–1.20) | 0.4974  | NA               |         |
|                         | 5 - Very high (≥90th pctl)        | 408.1   | 185   | 45.3 | 1.03 (0.88–1.20) | 0.754   | 1.06 (0.91–1.25) | 0.4571  | NA               |         |
| Melanoma                | 1 - Very low (≤10th pctl)         | 989.7   | 45    | 4.5  | 1.33 (0.96–1.85) | 0.0874  | 1.12 (0.80–1.57) | 0.4969  | 1.06 (0.69–1.62) | 0.7834  |
|                         | 2 - Low (>10 to ≤25th pctl)       | 1,683.0 | 41    | 2.4  | 0.77 (0.55–1.09) | 0.1379  | 0.75 (0.53–1.05) | 0.0965  | 0.58 (0.36–0.94) | 0.0267  |
|                         | 3 - Medium (>25 to <75th<br>pctl) | 5,219.7 | 170   | 3.3  | 1.00 (Reference) |         | 1.00 (Reference) |         | 1.00 (Reference) |         |
|                         | 4 - High (≥75 to <90th pctl)      | 1,521.5 | 82    | 5.4  | 1.67 (1.29–2.18) | 0.0001  | 1.79 (1.37–2.33) | <0.0001 | 1.45 (1.04–2.02) | 0.029   |
|                         | 5 - Very high (≥90th pctl)        | 899.8   | 86    | 9.6  | 2.97 (2.29–3.85) | <0.0001 | 2.99 (2.30–3.88) | <0.0001 | 1.15 (0.81–1.63) | 0.4196  |
| Head and neck           | 1 - Very low (≤10th pctl)         | 904.8   | 60    | 6.6  | 1.11 (0.84–1.46) | 0.4656  | 0.91 (0.69–1.21) | 0.5207  | 1.04 (0.74–1.47) | 0.8045  |
|                         | 2 - Low (>10 to ≤25th pctl)       | 1,489.8 | 69    | 4.6  | 0.79 (0.61–1.02) | 0.0746  | 0.72 (0.55–0.93) | 0.0129  | 0.84 (0.63–1.12) | 0.2408  |
|                         | 3 - Medium (>25 to <75th<br>pctl) | 5,158.0 | 291   | 5.6  | 1.00 (Reference) |         | 1.00 (Reference) |         | 1.00 (Reference) |         |
|                         | 4 - High (≥75 to <90th pctl)      | 1,437.1 | 112   | 7.8  | 1.35 (1.09–1.68) | 0.0065  | 1.41 (1.13–1.75) | 0.0023  | 1.20 (0.94–1.55) | 0.145   |
|                         | 5 - Very high (≥90th pctl)        | 717.5   | 110   | 15.3 | 2.43 (1.95–3.03) | <0.0001 | 2.49 (2.00–3.10) | <0.0001 | 2.13 (1.64–2.76) | <0.0001 |
| Other solid tu-<br>mour | 1 - Very low (≤10th pctl)         | 1,370.5 | 354   | 25.8 | 1.10 (0.98–1.23) | 0.1036  | 0.98 (0.87–1.10) | 0.7386  | 1.04 (0.79–1.37) | 0.7902  |
|                         | 2 - Low (>10 to ≤25th pctl)       | 2,653.1 | 501   | 18.9 | 0.88 (0.79–0.97) | 0.0095  | 0.80 (0.72–0.88) | <0.0001 | 0.86 (0.70–1.06) | 0.1678  |
|                         | 3 - Medium (>25 to <75th<br>pctl) | 8,195.0 | 1,798 | 21.9 | 1.00 (Reference) |         | 1.00 (Reference) |         | 1.00 (Reference) |         |
|                         | 4 - High (≥75 to <90th pctl)      | 1,726.9 | 715   | 41.4 | 1.61 (1.48–1.76) | <0.0001 | 1.58 (1.45–1.72) | <0.0001 | 1.34 (1.11–1.62) | 0.0021  |
|                         | 5 - Very high (≥90th pctl)        | 934.4   | 547   | 58.5 | 2.10 (1.91–2.31) | <0.0001 | 2.15 (1.95–2.36) | <0.0001 | 1.26 (1.01–1.58) | 0.0408  |

HR = Hazard ratio; pctl = percentile; NA = Not applicable; \*SS\* = data suppressed due to small number of observations/events. \* Adjusted for age at diagnosis (cat.), year of diagnosis (cont.), and common chronic conditions (asthma, congestive heart failure, chronic obstructive pulmonary disease, hypertension, and diabetes). \*\* Adjusted for age at diagnosis (cat.), year of diagnosis (cont.), common chronic conditions (asthma, congestive heart failure, chronic obstructive pulmonary disease, hypertension, and diabetes), and cancer stage. Only subjects with known cancer stage were included.

**Table S13.** Cancer-specific mortality rates and hazard ratios by baseline platelet count category, by cancer site and stage.

| Cancer   | Stage        | Platelet category              | Person-years | Cancer-specific deaths | Rate (% per year) | Unadjusted       |         | Patient variable adjustment* |         |
|----------|--------------|--------------------------------|--------------|------------------------|-------------------|------------------|---------|------------------------------|---------|
|          |              |                                |              |                        |                   | HR (95% CI)      | P-value | HR (95% CI)                  | P-value |
| Colon    | Stage I/II   | 1 - Low ( $\leq$ 25th pctl)    | 7,903.0      | 174                    | 2.2               | 0.84 (0.70–1.00) | 0.0525  | 0.83 (0.69–1.00)             | 0.0481  |
|          |              | 2 - Medium (>25 to <75th pctl) | 13,884.1     | 359                    | 2.6               | 1.00 (Reference) |         | 1.00 (Reference)             |         |
|          |              | 3 - High ( $\geq$ 75th pctl)   | 5,339.5      | 235                    | 4.4               | 1.69 (1.43–1.99) | <0.0001 | 1.64 (1.39–1.93)             | <0.0001 |
|          | Stage III/IV | 1 - Low ( $\leq$ 25th pctl)    | 4,713.3      | 628                    | 13.3              | 0.76 (0.69–0.83) | <0.0001 | 0.75 (0.68–0.82)             | <0.0001 |
|          |              | 2 - Medium (>25 to <75th pctl) | 10,837.4     | 1,890                  | 17.4              | 1.00 (Reference) |         | 1.00 (Reference)             |         |
|          |              | 3 - High ( $\geq$ 75th pctl)   | 5,211.6      | 1,457                  | 28.0              | 1.52 (1.42–1.63) | <0.0001 | 1.55 (1.45–1.66)             | <0.0001 |
| Lung     | Stage I/II   | 1 - Low ( $\leq$ 25th pctl)    | 5,134.4      | 367                    | 7.1               | 0.85 (0.74–0.96) | 0.0113  | 0.77 (0.68–0.88)             | 0.0001  |
|          |              | 2 - Medium (>25 to <75th pctl) | 7,166.3      | 598                    | 8.3               | 1.00 (Reference) |         | 1.00 (Reference)             |         |
|          |              | 3 - High ( $\geq$ 75th pctl)   | 1,615.8      | 217                    | 13.4              | 1.61 (1.38–1.88) | <0.0001 | 1.58 (1.35–1.84)             | <0.0001 |
|          | Stage III/IV | 1 - Low ( $\leq$ 25th pctl)    | 2,855.5      | 2,105                  | 73.7              | 0.98 (0.93–1.03) | 0.5141  | 0.92 (0.87–0.97)             | 0.0013  |
|          |              | 2 - Medium (>25 to <75th pctl) | 7,040.7      | 5,319                  | 75.5              | 1.00 (Reference) |         | 1.00 (Reference)             |         |
|          |              | 3 - High ( $\geq$ 75th pctl)   | 3,072.5      | 3,298                  | 107.3             | 1.31 (1.26–1.37) | <0.0001 | 1.33 (1.28–1.39)             | <0.0001 |
| Breast   | Stage I/II   | 1 - Low ( $\leq$ 25th pctl)    | 7,604.1      | 91                     | 1.2               | 1.54 (1.17–2.02) | 0.002   | 1.35 (1.03–1.78)             | 0.0297  |
|          |              | 2 - Medium (>25 to <75th pctl) | 15,684.7     | 122                    | 0.8               | 1.00 (Reference) |         | 1.00 (Reference)             |         |
|          |              | 3 - High ( $\geq$ 75th pctl)   | 6,960.8      | 80                     | 1.1               | 1.48 (1.12–1.96) | 0.0063  | 1.54 (1.16–2.05)             | 0.0027  |
|          | Stage III/IV | 1 - Low ( $\leq$ 25th pctl)    | 1,452.0      | 166                    | 11.4              | 1.10 (0.92–1.33) | 0.2955  | 1.02 (0.85–1.23)             | 0.8266  |
|          |              | 2 - Medium (>25 to <75th pctl) | 3,434.2      | 348                    | 10.1              | 1.00 (Reference) |         | 1.00 (Reference)             |         |
|          |              | 3 - High ( $\geq$ 75th pctl)   | 2,073.0      | 306                    | 14.8              | 1.43 (1.22–1.67) | <0.0001 | 1.43 (1.23–1.67)             | <0.0001 |
| Prostate | Stage I/II   | 1 - Low ( $\leq$ 25th pctl)    | 5,334.1      | 48                     | 0.9               | 1.41 (0.99–2.03) | 0.0603  | 1.26 (0.88–1.82)             | 0.205   |
|          |              | 2 - Medium (>25 to <75th pctl) | 11,967.9     | 77                     | 0.6               | 1.00 (Reference) |         | 1.00 (Reference)             |         |
|          |              | 3 - High ( $\geq$ 75th pctl)   | 5,276.6      | 58                     | 1.1               | 1.70 (1.21–2.39) | 0.0023  | 1.77 (1.26–2.49)             | 0.0011  |
|          | Stage III/IV | 1 - Low ( $\leq$ 25th pctl)    | 1,586.4      | 243                    | 15.3              | 1.68 (1.42–1.99) | <0.0001 | 1.33 (1.12–1.58)             | 0.0009  |
|          |              | 2 - Medium (>25 to <75th pctl) | 3,675.6      | 318                    | 8.7               | 1.00 (Reference) |         | 1.00 (Reference)             |         |
|          |              | 3 - High ( $\geq$ 75th pctl)   | 2,019.5      | 305                    | 15.1              | 1.68 (1.44–1.97) | <0.0001 | 1.57 (1.34–1.84)             | <0.0001 |
| Ovary    | Stage I/II   | 1 - Low ( $\leq$ 25th pctl)    | 864.7        | 14                     | 1.6               | 0.73 (0.38–1.38) | 0.3267  | 0.70 (0.37–1.34)             | 0.2818  |
|          |              | 2 - Medium (>25 to <75th pctl) | 1,315.1      | 29                     | 2.2               | 1.00 (Reference) |         | 1.00 (Reference)             |         |
|          |              | 3 - High ( $\geq$ 75th pctl)   | 314.4        | 21                     | 6.7               | 3.01 (1.71–5.30) | 0.0001  | 3.10 (1.74–5.52)             | 0.0001  |
|          | Stage III/IV | 1 - Low ( $\leq$ 25th pctl)    | 634.0        | 116                    | 18.3              | 0.82 (0.67–1.01) | 0.0617  | 0.76 (0.62–0.94)             | 0.0124  |
|          |              | 2 - Medium (>25 to <75th pctl) | 1,751.5      | 392                    | 22.4              | 1.00 (Reference) |         | 1.00 (Reference)             |         |
|          |              | 3 - High ( $\geq$ 75th pctl)   | 1,028.4      | 289                    | 28.1              | 1.25 (1.08–1.46) | 0.0034  | 1.30 (1.12–1.52)             | 0.0007  |
| Stomach  | Stage I/II   | 1 - Low ( $\leq$ 25th pctl)    | 321.7        | 37                     | 11.5              | 1.07 (0.71–1.60) | 0.7404  | 0.92 (0.60–1.41)             | 0.7021  |
|          |              | 2 - Medium (>25 to <75th pctl) | 649.7        | 65                     | 10.0              | 1.00 (Reference) |         | 1.00 (Reference)             |         |



|              |                                        |       |     |      |                  |        |                  |        |
|--------------|----------------------------------------|-------|-----|------|------------------|--------|------------------|--------|
| Stage III/IV | 3 - High ( $\geq 75$ th pctl)          | 249.2 | 21  | 8.4  | 0.92 (0.56–1.50) | 0.7321 | 0.73 (0.44–1.21) | 0.2161 |
|              | 1 - Low ( $\leq 25$ th pctl)           | 259.6 | 150 | 57.8 | 1.03 (0.86–1.25) | 0.7246 | 1.03 (0.85–1.25) | 0.7462 |
|              | 2 - Medium ( $> 25$ to $< 75$ th pctl) | 668.1 | 382 | 57.2 | 1.00 (Reference) |        | 1.00 (Reference) |        |
|              | 3 - High ( $\geq 75$ th pctl)          | 329.9 | 218 | 66.1 | 1.14 (0.96–1.34) | 0.1316 | 1.16 (0.98–1.37) | 0.0881 |

\* Adjusted for age at diagnosis (cat.), year of diagnosis (cont.), and common chronic conditions (asthma, congestive heart failure, chronic obstructive pulmonary disease, hypertension, and diabetes).

**Table S14.** Cancer-specific mortality rates and hazard ratios by time-dependent platelet count category, for select cancers.

| Cancer      | Platelet category                      | Person-years | Cancer-specific deaths | Rate (% per year) | Unadjusted       |         | Patient variable adjustment * |         | Patient variable, cancer stage, and cancer treatment adjustment** |         |
|-------------|----------------------------------------|--------------|------------------------|-------------------|------------------|---------|-------------------------------|---------|-------------------------------------------------------------------|---------|
|             |                                        |              |                        |                   | HR (95% CI)      | P-value | HR (95% CI)                   | P-value | HR (95% CI)                                                       | P-value |
| All cancers | 1 - Low ( $\leq 25$ th pctl)           | 102,159.7    | 10,826                 | 10.6              | 1.01 (0.98–1.03) | 0.5642  | 0.95 (0.92–0.97)              | <0.0001 | NA                                                                |         |
|             | 2 - Medium ( $> 25$ to $< 75$ th pctl) | 141,620.0    | 16,661                 | 11.8              | 1.00 (Reference) |         | 1.00 (Reference)              |         | NA                                                                |         |
|             | 3 - High ( $\geq 75$ th pctl)          | 51,479.6     | 12,842                 | 24.9              | 1.79 (1.75–1.83) | <0.0001 | 1.83 (1.79–1.88)              | <0.0001 | NA                                                                |         |
| Colon       | 1 - Low ( $\leq 25$ th pctl)           | 24,233.9     | 1,330                  | 5.5               | 0.61 (0.57–0.65) | <0.0001 | 0.61 (0.57–0.65)              | <0.0001 | 0.57 (0.52–0.62)                                                  | <0.0001 |
|             | 2 - Medium ( $> 25$ to $< 75$ th pctl) | 21,480.1     | 2,312                  | 10.8              | 1.00 (Reference) |         | 1.00 (Reference)              |         | 1.00 (Reference)                                                  |         |
|             | 3 - High ( $\geq 75$ th pctl)          | 4,877.6      | 1,678                  | 34.4              | 2.30 (2.16–2.45) | <0.0001 | 2.32 (2.18–2.48)              | <0.0001 | 1.76 (1.62–1.92)                                                  | <0.0001 |
| Lung        | 1 - Low ( $\leq 25$ th pctl)           | 9,957.4      | 3,252                  | 32.7              | 0.86 (0.83–0.90) | <0.0001 | 0.83 (0.79–0.87)              | <0.0001 | 0.90 (0.86–0.95)                                                  | <0.0001 |
|             | 2 - Medium ( $> 25$ to $< 75$ th pctl) | 14,057.4     | 5,943                  | 42.3              | 1.00 (Reference) |         | 1.00 (Reference)              |         | 1.00 (Reference)                                                  |         |
|             | 3 - High ( $\geq 75$ th pctl)          | 4,337.5      | 3,979                  | 91.7              | 1.72 (1.65–1.79) | <0.0001 | 1.75 (1.68–1.83)              | <0.0001 | 1.48 (1.41–1.54)                                                  | <0.0001 |
| Breast      | 1 - Low ( $\leq 25$ th pctl)           | 12,565.1     | 405                    | 3.2               | 1.46 (1.27–1.67) | <0.0001 | 1.36 (1.18–1.55)              | <0.0001 | 1.30 (1.12–1.51)                                                  | 0.0006  |
|             | 2 - Medium ( $> 25$ to $< 75$ th pctl) | 18,594.0     | 426                    | 2.3               | 1.00 (Reference) |         | 1.00 (Reference)              |         | 1.00 (Reference)                                                  |         |
|             | 3 - High ( $\geq 75$ th pctl)          | 7,399.9      | 411                    | 5.6               | 2.29 (2.00–2.63) | <0.0001 | 2.35 (2.05–2.69)              | <0.0001 | 1.85 (1.59–2.15)                                                  | <0.0001 |
| Prostate    | 1 - Low ( $\leq 25$ th pctl)           | 8,582.4      | 396                    | 4.6               | 1.84 (1.60–2.11) | <0.0001 | 1.60 (1.39–1.84)              | <0.0001 | 1.69 (1.43–2.00)                                                  | <0.0001 |
|             | 2 - Medium ( $> 25$ to $< 75$ th pctl) | 16,723.2     | 418                    | 2.5               | 1.00 (Reference) |         | 1.00 (Reference)              |         | 1.00 (Reference)                                                  |         |
|             | 3 - High ( $\geq 75$ th pctl)          | 7,189.0      | 459                    | 6.4               | 2.45 (2.15–2.80) | <0.0001 | 2.40 (2.10–2.74)              | <0.0001 | 1.93 (1.65–2.27)                                                  | <0.0001 |
| Ovary       | 1 - Low ( $\leq 25$ th pctl)           | 4,054.0      | 416                    | 10.3              | 0.63 (0.55–0.71) | <0.0001 | 0.60 (0.52–0.68)              | <0.0001 | 0.58 (0.48–0.70)                                                  | <0.0001 |
|             | 2 - Medium ( $> 25$ to $< 75$ th pctl) | 3,046.8      | 548                    | 18.0              | 1.00 (Reference) |         | 1.00 (Reference)              |         | 1.00 (Reference)                                                  |         |
|             | 3 - High ( $\geq 75$ th pctl)          | 778.0        | 371                    | 47.7              | 2.22 (1.94–2.54) | <0.0001 | 2.29 (2.00–2.62)              | <0.0001 | 2.39 (1.93–2.95)                                                  | <0.0001 |
| Stomach     | 1 - Low ( $\leq 25$ th pctl)           | 2,266.9      | 603                    | 26.6              | 0.85 (0.77–0.94) | 0.0022  | 0.84 (0.76–0.93)              | 0.0012  | 0.87 (0.73–1.04)                                                  | 0.1174  |

|                                   |         |     |      |                  |         |                  |         |                  |        |
|-----------------------------------|---------|-----|------|------------------|---------|------------------|---------|------------------|--------|
| 2 - Medium (>25 to <75th<br>pctl) | 2,416.1 | 908 | 37.6 | 1.00 (Reference) |         | 1.00 (Reference) |         | 1.00 (Reference) |        |
| 3 - High (≥75th pctl)             | 694.9   | 576 | 82.9 | 1.62 (1.46–1.80) | <0.0001 | 1.61 (1.45–1.79) | <0.0001 | 1.28 (1.07–1.53) | 0.0077 |

HR = Hazard ratio; pctl = percentile. \* Adjusted for age at diagnosis (cat.), year of diagnosis (cont.), and common chronic conditions (asthma, congestive heart failure, chronic obstructive pulmonary disease, hypertension, and diabetes). \*\* Adjusted for age at diagnosis (cat.), year of diagnosis (cont.), common chronic conditions (asthma, congestive heart failure, chronic obstructive pulmonary disease, hypertension, and diabetes), cancer stage, chemotherapy, and radiotherapy. Time-dependent confounding adjustment using marginal structural models. Only subjects with known cancer stage were included.

**Table S15.** Cancer-specific mortality rates and hazard ratios by time-dependent platelet count category (exposure definition 1).

| Cancer      | Platelet category              | Unadjusted       |         | Patient variable adjustment* |         | Patient variable and cancer stage adjustment** |         | Patient variable, cancer stage, and cancer treatment adjustment*** |         |
|-------------|--------------------------------|------------------|---------|------------------------------|---------|------------------------------------------------|---------|--------------------------------------------------------------------|---------|
|             |                                | HR (95% CI)      | P-value | HR (95% CI)                  | P-value | HR (95% CI)                                    | P-value | HR (95% CI)                                                        | P-value |
| All cancers | 1 - Low (≤25th pctl)           | 1.01 (0.98–1.03) | 0.5642  | 0.95 (0.92–0.97)             | <0.0001 | 0.89 (0.86–0.92)                               | <0.0001 | NA                                                                 |         |
|             | 2 - Medium (>25 to <75th pctl) | 1.00 (Reference) |         | 1.00 (Reference)             |         | 1.00 (Reference)                               |         | NA                                                                 |         |
|             | 3 - High (≥75th pctl)          | 1.79 (1.75–1.83) | <0.0001 | 1.83 (1.79–1.88)             | <0.0001 | 1.51 (1.47–1.56)                               | <0.0001 | NA                                                                 |         |
| Colon       | 1 - Low (≤25th pctl)           | 0.61 (0.57–0.65) | <0.0001 | 0.61 (0.57–0.65)             | <0.0001 | 0.63 (0.59–0.68)                               | <0.0001 | 0.57 (0.52–0.62)                                                   | <0.0001 |
|             | 2 - Medium (>25 to <75th pctl) | 1.00 (Reference) |         | 1.00 (Reference)             |         | 1.00 (Reference)                               |         | 1.00 (Reference)                                                   |         |
|             | 3 - High (≥75th pctl)          | 2.30 (2.16–2.45) | <0.0001 | 2.32 (2.18–2.48)             | <0.0001 | 1.72 (1.61–1.84)                               | <0.0001 | 1.76 (1.62–1.92)                                                   | <0.0001 |
| Lung        | 1 - Low (≤25th pctl)           | 0.86 (0.83–0.90) | <0.0001 | 0.83 (0.79–0.87)             | <0.0001 | 0.91 (0.87–0.95)                               | <0.0001 | 0.90 (0.86–0.95)                                                   | <0.0001 |
|             | 2 - Medium (>25 to <75th pctl) | 1.00 (Reference) |         | 1.00 (Reference)             |         | 1.00 (Reference)                               |         | 1.00 (Reference)                                                   |         |
|             | 3 - High (≥75th pctl)          | 1.72 (1.65–1.79) | <0.0001 | 1.75 (1.68–1.83)             | <0.0001 | 1.48 (1.42–1.55)                               | <0.0001 | 1.48 (1.41–1.54)                                                   | <0.0001 |
| Breast      | 1 - Low (≤25th pctl)           | 1.46 (1.27–1.67) | <0.0001 | 1.36 (1.18–1.55)             | <0.0001 | 1.32 (1.14–1.52)                               | 0.0002  | 1.30 (1.12–1.51)                                                   | 0.0006  |
|             | 2 - Medium (>25 to <75th pctl) | 1.00 (Reference) |         | 1.00 (Reference)             |         | 1.00 (Reference)                               |         | 1.00 (Reference)                                                   |         |
|             | 3 - High (≥75th pctl)          | 2.29 (2.00–2.63) | <0.0001 | 2.35 (2.05–2.69)             | <0.0001 | 1.87 (1.62–2.16)                               | <0.0001 | 1.85 (1.59–2.15)                                                   | <0.0001 |
| Prostate    | 1 - Low (≤25th pctl)           | 1.84 (1.60–2.11) | <0.0001 | 1.60 (1.39–1.84)             | <0.0001 | 1.69 (1.45–1.97)                               | <0.0001 | 1.69 (1.43–2.00)                                                   | <0.0001 |
|             | 2 - Medium (>25 to <75th pctl) | 1.00 (Reference) |         | 1.00 (Reference)             |         | 1.00 (Reference)                               |         | 1.00 (Reference)                                                   |         |
|             | 3 - High (≥75th pctl)          | 2.45 (2.15–2.80) | <0.0001 | 2.40 (2.10–2.74)             | <0.0001 | 1.98 (1.70–2.29)                               | <0.0001 | 1.93 (1.65–2.27)                                                   | <0.0001 |
| Ovary       | 1 - Low (≤25th pctl)           | 0.63 (0.55–0.71) | <0.0001 | 0.60 (0.52–0.68)             | <0.0001 | 0.61 (0.52–0.72)                               | <0.0001 | 0.58 (0.48–0.70)                                                   | <0.0001 |
|             | 2 - Medium (>25 to <75th pctl) | 1.00 (Reference) |         | 1.00 (Reference)             |         | 1.00 (Reference)                               |         | 1.00 (Reference)                                                   |         |
|             | 3 - High (≥75th pctl)          | 2.22 (1.94–2.54) | <0.0001 | 2.29 (2.00–2.62)             | <0.0001 | 2.18 (1.83–2.59)                               | <0.0001 | 2.39 (1.93–2.95)                                                   | <0.0001 |
| Stomach     | 1 - Low (≤25th pctl)           | 0.85 (0.77–0.94) | 0.0022  | 0.84 (0.76–0.93)             | 0.0012  | 0.89 (0.76–1.05)                               | 0.1696  | 0.87 (0.73–1.04)                                                   | 0.1174  |
|             | 2 - Medium (>25 to <75th pctl) | 1.00 (Reference) |         | 1.00 (Reference)             |         | 1.00 (Reference)                               |         | 1.00 (Reference)                                                   |         |
|             | 3 - High (≥75th pctl)          | 1.62 (1.46–1.80) | <0.0001 | 1.61 (1.45–1.79)             | <0.0001 | 1.29 (1.09–1.53)                               | 0.0026  | 1.28 (1.07–1.53)                                                   | 0.0077  |
| Pancreas    | 1 - Low (≤25th pctl)           | 1.08 (1.00–1.16) | 0.0474  | 1.08 (1.00–1.16)             | 0.0418  | 0.91 (0.82–1.02)                               | 0.1014  | 0.87 (0.77–0.99)                                                   | 0.0335  |
|             | 2 - Medium (>25 to <75th pctl) | 1.00 (Reference) |         | 1.00 (Reference)             |         | 1.00 (Reference)                               |         | 1.00 (Reference)                                                   |         |
|             | 3 - High (≥75th pctl)          | 1.15 (1.07–1.24) | 0.0002  | 1.20 (1.11–1.29)             | <0.0001 | 1.21 (1.08–1.35)                               | 0.0008  | 1.17 (1.04–1.32)                                                   | 0.0112  |
| Kidney      | 1 - Low (≤25th pctl)           | 1.11 (0.93–1.31) | 0.2464  | 0.98 (0.82–1.16)             | 0.8091  | 0.99 (0.78–1.25)                               | 0.9354  | 0.95 (0.73–1.25)                                                   | 0.7255  |
|             | 2 - Medium (>25 to <75th pctl) | 1.00 (Reference) |         | 1.00 (Reference)             |         | 1.00 (Reference)                               |         | 1.00 (Reference)                                                   |         |
|             | 3 - High (≥75th pctl)          | 3.94 (3.42–4.54) | <0.0001 | 3.82 (3.31–4.40)             | <0.0001 | 2.31 (1.89–2.82)                               | <0.0001 | 2.42 (1.94–3.02)                                                   | <0.0001 |

|                    |                                |                  |         |                  |         |                  |         |                  |         |
|--------------------|--------------------------------|------------------|---------|------------------|---------|------------------|---------|------------------|---------|
| Bladder            | 1 - Low ( $\leq 25$ th pctl)   | 1.01 (0.85–1.20) | 0.9057  | 0.87 (0.73–1.04) | 0.1177  | 0.79 (0.60–1.06) | 0.1125  | 0.78 (0.57–1.08) | 0.1308  |
|                    | 2 - Medium (>25 to <75th pctl) | 1.00 (Reference) |         | 1.00 (Reference) |         | 1.00 (Reference) |         | 1.00 (Reference) |         |
|                    | 3 - High ( $\geq 75$ th pctl)  | 3.45 (3.03–3.93) | <0.0001 | 3.49 (3.06–3.98) | <0.0001 | 2.29 (1.84–2.85) | <0.0001 | 2.21 (1.76–2.78) | <0.0001 |
| Esophagus          | 1 - Low ( $\leq 25$ th pctl)   | 0.99 (0.85–1.14) | 0.865   | 0.97 (0.84–1.12) | 0.6723  | 0.85 (0.69–1.03) | 0.0998  | 0.87 (0.70–1.08) | 0.1979  |
|                    | 2 - Medium (>25 to <75th pctl) | 1.00 (Reference) |         | 1.00 (Reference) |         | 1.00 (Reference) |         | 1.00 (Reference) |         |
|                    | 3 - High ( $\geq 75$ th pctl)  | 1.74 (1.50–2.01) | <0.0001 | 1.79 (1.55–2.07) | <0.0001 | 1.38 (1.13–1.69) | 0.0014  | 1.42 (1.13–1.78) | 0.0025  |
| Other GI           | 1 - Low ( $\leq 25$ th pctl)   | 0.97 (0.80–1.18) | 0.7651  | 0.95 (0.78–1.15) | 0.5731  | 0.85 (0.62–1.16) | 0.2995  | 0.71 (0.51–1.00) | 0.0505  |
|                    | 2 - Medium (>25 to <75th pctl) | 1.00 (Reference) |         | 1.00 (Reference) |         | 1.00 (Reference) |         | 1.00 (Reference) |         |
|                    | 3 - High ( $\geq 75$ th pctl)  | 2.13 (1.77–2.56) | <0.0001 | 2.17 (1.81–2.61) | <0.0001 | 1.86 (1.38–2.51) | <0.0001 | 1.76 (1.26–2.45) | 0.0009  |
| Thyroid            | 1 - Low ( $\leq 25$ th pctl)   | 1.47 (0.89–2.41) | 0.13    | 1.22 (0.74–2.01) | 0.4353  | 0.62 (0.30–1.26) | 0.1842  | 0.58 (0.24–1.41) | 0.2319  |
|                    | 2 - Medium (>25 to <75th pctl) | 1.00 (Reference) |         | 1.00 (Reference) |         | 1.00 (Reference) |         | 1.00 (Reference) |         |
|                    | 3 - High ( $\geq 75$ th pctl)  | 2.36 (1.53–3.64) | <0.0001 | 2.82 (1.82–4.36) | <0.0001 | 1.43 (0.82–2.47) | 0.2074  | 1.41 (0.76–2.62) | 0.2804  |
| Cervix             | 1 - Low ( $\leq 25$ th pctl)   | 0.70 (0.50–0.99) | 0.0418  | 0.64 (0.45–0.91) | 0.0119  | 0.67 (0.47–0.96) | 0.0313  | 0.62 (0.33–1.16) | 0.1353  |
|                    | 2 - Medium (>25 to <75th pctl) | 1.00 (Reference) |         | 1.00 (Reference) |         | 1.00 (Reference) |         | 1.00 (Reference) |         |
|                    | 3 - High ( $\geq 75$ th pctl)  | 3.41 (2.55–4.56) | <0.0001 | 3.43 (2.56–4.58) | <0.0001 | 2.15 (1.57–2.95) | <0.0001 | 1.90 (1.20–3.02) | 0.0062  |
| Testis             | 1 - Low ( $\leq 25$ th pctl)   | 1.10 (0.38–3.17) | 0.861   | 0.94 (0.32–2.77) | 0.9119  | 0.41 (0.11–1.57) | 0.1925  | 1.56 (0.61–4.01) | 0.3574  |
|                    | 2 - Medium (>25 to <75th pctl) | 1.00 (Reference) |         | 1.00 (Reference) |         | 1.00 (Reference) |         | 1.00 (Reference) |         |
|                    | 3 - High ( $\geq 75$ th pctl)  | 2.72 (1.05–7.06) | 0.0396  | 2.53 (0.95–6.71) | 0.0623  | 0.46 (0.13–1.69) | 0.245   | 0.30 (0.05–1.74) | 0.1801  |
| Endometrium        | 1 - Low ( $\leq 25$ th pctl)   | 1.52 (1.22–1.88) | 0.0002  | 1.31 (1.05–1.63) | 0.0155  | 1.24 (0.96–1.60) | 0.1048  | 1.21 (0.86–1.69) | 0.2725  |
|                    | 2 - Medium (>25 to <75th pctl) | 1.00 (Reference) |         | 1.00 (Reference) |         | 1.00 (Reference) |         | 1.00 (Reference) |         |
|                    | 3 - High ( $\geq 75$ th pctl)  | 4.56 (3.77–5.52) | <0.0001 | 4.89 (4.04–5.92) | <0.0001 | 3.45 (2.73–4.37) | <0.0001 | 3.96 (2.90–5.41) | <0.0001 |
| Brain              | 1 - Low ( $\leq 25$ th pctl)   | 1.44 (1.30–1.60) | <0.0001 | 1.29 (1.16–1.43) | <0.0001 | NA               |         | NA               |         |
|                    | 2 - Medium (>25 to <75th pctl) | 1.00 (Reference) |         | 1.00 (Reference) |         | NA               |         | NA               |         |
|                    | 3 - High ( $\geq 75$ th pctl)  | 1.16 (1.02–1.32) | 0.0227  | 1.20 (1.05–1.36) | 0.0071  | NA               |         | NA               |         |
| Melanoma           | 1 - Low ( $\leq 25$ th pctl)   | 1.07 (0.82–1.41) | 0.6191  | 0.97 (0.74–1.28) | 0.8508  | 0.84 (0.58–1.20) | 0.337   | 0.78 (0.53–1.16) | 0.222   |
|                    | 2 - Medium (>25 to <75th pctl) | 1.00 (Reference) |         | 1.00 (Reference) |         | 1.00 (Reference) |         | 1.00 (Reference) |         |
|                    | 3 - High ( $\geq 75$ th pctl)  | 3.10 (2.50–3.84) | <0.0001 | 3.22 (2.60–4.00) | <0.0001 | 2.34 (1.79–3.06) | <0.0001 | 2.28 (1.68–3.08) | <0.0001 |
| Head and neck      | 1 - Low ( $\leq 25$ th pctl)   | 0.84 (0.68–1.03) | 0.0991  | 0.76 (0.61–0.94) | 0.0106  | 0.74 (0.58–0.94) | 0.0146  | 0.70 (0.54–0.91) | 0.0071  |
|                    | 2 - Medium (>25 to <75th pctl) | 1.00 (Reference) |         | 1.00 (Reference) |         | 1.00 (Reference) |         | 1.00 (Reference) |         |
|                    | 3 - High ( $\geq 75$ th pctl)  | 2.32 (1.95–2.76) | <0.0001 | 2.36 (1.98–2.81) | <0.0001 | 2.18 (1.78–2.66) | <0.0001 | 2.12 (1.71–2.62) | <0.0001 |
| Other solid tumour | 1 - Low ( $\leq 25$ th pctl)   | 1.05 (0.97–1.13) | 0.2735  | 0.97 (0.89–1.05) | 0.3829  | 0.96 (0.81–1.14) | 0.6603  | 0.95 (0.79–1.14) | 0.5781  |
|                    | 2 - Medium (>25 to <75th pctl) | 1.00 (Reference) |         | 1.00 (Reference) |         | 1.00 (Reference) |         | 1.00 (Reference) |         |
|                    | 3 - High ( $\geq 75$ th pctl)  | 2.09 (1.94–2.25) | <0.0001 | 2.10 (1.95–2.26) | <0.0001 | 1.90 (1.62–2.22) | <0.0001 | 1.88 (1.57–2.24) | <0.0001 |

HR = Hazard ratio; pctl = percentile; NA = Not applicable; \*SS\* = data suppressed due to small number of observations/events. \* Adjusted for age at diagnosis (cat.), year of diagnosis (cont.), and common chronic conditions (asthma, congestive heart failure, chronic obstructive pulmonary disease, hypertension, and diabetes). \*\* Adjusted for age at diagnosis (cat.), year of diagnosis (cont.), common chronic conditions (asthma, congestive heart failure, chronic obstructive pulmonary disease, hypertension, and diabetes), and cancer stage. Only subjects with known cancer stage were included in the analysis. \*\*\* Adjusted for age at diagnosis (cat.), year of diagnosis (cont.), common chronic conditions (asthma, congestive heart failure, chronic obstructive pulmonary disease, hypertension, and diabetes), cancer stage, chemotherapy, and radiotherapy. Only subjects with known cancer stage were included in the analysis. Time-dependent confounding adjustment using marginal structural models.

**Table S16.** Cancer-specific mortality rates and hazard ratios by time-dependent platelet count category (exposure definition 2).

| Cancer      | Platelet category                      | Unadjusted       |         | Patient variable adjustment* |         | Patient variable and cancer stage adjustment** |         | Patient variable, cancer stage, and cancer treatment adjustment*** |         |
|-------------|----------------------------------------|------------------|---------|------------------------------|---------|------------------------------------------------|---------|--------------------------------------------------------------------|---------|
|             |                                        | HR (95% CI)      | P-value | HR (95% CI)                  | P-value | HR (95% CI)                                    | P-value | HR (95% CI)                                                        | P-value |
| All cancers | 1 - Very low ( $\leq 10$ th pctl)      | 1.20 (1.17–1.24) | <0.0001 | 1.11 (1.08–1.15)             | <0.0001 | 0.99 (0.95–1.02)                               | 0.4335  | NA                                                                 |         |
|             | 2 - Low ( $>10$ to $\leq 25$ th pctl)  | 0.85 (0.82–0.88) | <0.0001 | 0.81 (0.78–0.84)             | <0.0001 | 0.80 (0.77–0.84)                               | <0.0001 | NA                                                                 |         |
|             | 3 - Medium ( $>25$ to $<75$ th pctl)   | 1.00 (Reference) |         | 1.00 (Reference)             |         | 1.00 (Reference)                               |         | NA                                                                 |         |
|             | 4 - High ( $\geq 75$ to $<90$ th pctl) | 1.51 (1.46–1.55) | <0.0001 | 1.54 (1.50–1.58)             | <0.0001 | 1.37 (1.32–1.41)                               | <0.0001 | NA                                                                 |         |
|             | 5 - Very high ( $\geq 90$ th pctl)     | 2.23 (2.17–2.30) | <0.0001 | 2.31 (2.24–2.38)             | <0.0001 | 1.71 (1.65–1.77)                               | <0.0001 | NA                                                                 |         |
| Colon       | 1 - Very low ( $\leq 10$ th pctl)      | 0.67 (0.62–0.73) | <0.0001 | 0.67 (0.61–0.72)             | <0.0001 | 0.65 (0.59–0.71)                               | <0.0001 | 0.63 (0.57–0.70)                                                   | <0.0001 |
|             | 2 - Low ( $>10$ to $\leq 25$ th pctl)  | 0.55 (0.51–0.61) | <0.0001 | 0.55 (0.50–0.60)             | <0.0001 | 0.61 (0.56–0.67)                               | <0.0001 | 0.61 (0.55–0.67)                                                   | <0.0001 |
|             | 3 - Medium ( $>25$ to $<75$ th pctl)   | 1.00 (Reference) |         | 1.00 (Reference)             |         | 1.00 (Reference)                               |         | 1.00 (Reference)                                                   |         |
|             | 4 - High ( $\geq 75$ to $<90$ th pctl) | 2.01 (1.86–2.17) | <0.0001 | 2.00 (1.85–2.16)             | <0.0001 | 1.60 (1.47–1.74)                               | <0.0001 | 1.59 (1.46–1.74)                                                   | <0.0001 |
|             | 5 - Very high ( $\geq 90$ th pctl)     | 2.80 (2.57–3.04) | <0.0001 | 2.90 (2.67–3.15)             | <0.0001 | 1.90 (1.74–2.08)                               | <0.0001 | 1.89 (1.70–2.11)                                                   | <0.0001 |
| Lung        | 1 - Very low ( $\leq 10$ th pctl)      | 1.00 (0.95–1.06) | 0.9609  | 0.95 (0.89–1.00)             | 0.0491  | 1.02 (0.96–1.08)                               | 0.5627  | 1.01 (0.95–1.08)                                                   | 0.6733  |
|             | 2 - Low ( $>10$ to $\leq 25$ th pctl)  | 0.76 (0.72–0.81) | <0.0001 | 0.74 (0.70–0.78)             | <0.0001 | 0.82 (0.78–0.87)                               | <0.0001 | 0.82 (0.77–0.87)                                                   | <0.0001 |
|             | 3 - Medium ( $>25$ to $<75$ th pctl)   | 1.00 (Reference) |         | 1.00 (Reference)             |         | 1.00 (Reference)                               |         | 1.00 (Reference)                                                   |         |
|             | 4 - High ( $\geq 75$ to $<90$ th pctl) | 1.56 (1.49–1.64) | <0.0001 | 1.58 (1.50–1.66)             | <0.0001 | 1.37 (1.30–1.44)                               | <0.0001 | 1.37 (1.29–1.44)                                                   | <0.0001 |
|             | 5 - Very high ( $\geq 90$ th pctl)     | 1.96 (1.86–2.07) | <0.0001 | 2.03 (1.93–2.15)             | <0.0001 | 1.65 (1.56–1.75)                               | <0.0001 | 1.65 (1.55–1.75)                                                   | <0.0001 |
| Breast      | 1 - Very low ( $\leq 10$ th pctl)      | 2.07 (1.77–2.42) | <0.0001 | 1.88 (1.60–2.20)             | <0.0001 | 1.66 (1.40–1.96)                               | <0.0001 | 1.62 (1.37–1.93)                                                   | <0.0001 |
|             | 2 - Low ( $>10$ to $\leq 25$ th pctl)  | 1.01 (0.84–1.21) | 0.8956  | 0.96 (0.80–1.15)             | 0.6489  | 1.01 (0.83–1.22)                               | 0.9447  | 1.00 (0.82–1.21)                                                   | 0.967   |
|             | 3 - Medium ( $>25$ to $<75$ th pctl)   | 1.00 (Reference) |         | 1.00 (Reference)             |         | 1.00 (Reference)                               |         | 1.00 (Reference)                                                   |         |
|             | 4 - High ( $\geq 75$ to $<90$ th pctl) | 1.47 (1.23–1.77) | <0.0001 | 1.52 (1.27–1.82)             | <0.0001 | 1.41 (1.16–1.71)                               | 0.0005  | 1.38 (1.13–1.68)                                                   | 0.0013  |
|             | 5 - Very high ( $\geq 90$ th pctl)     | 3.62 (3.09–4.24) | <0.0001 | 3.65 (3.12–4.28)             | <0.0001 | 2.40 (2.03–2.84)                               | <0.0001 | 2.35 (1.94–2.84)                                                   | <0.0001 |
| Prostate    | 1 - Very low ( $\leq 10$ th pctl)      | 2.99 (2.55–3.50) | <0.0001 | 2.46 (2.10–2.88)             | <0.0001 | 2.48 (2.08–2.96)                               | <0.0001 | 2.37 (1.94–2.90)                                                   | <0.0001 |
|             | 2 - Low ( $>10$ to $\leq 25$ th pctl)  | 1.12 (0.93–1.35) | 0.2304  | 1.02 (0.85–1.23)             | 0.8208  | 1.15 (0.94–1.41)                               | 0.1768  | 1.17 (0.95–1.45)                                                   | 0.1431  |
|             | 3 - Medium ( $>25$ to $<75$ th pctl)   | 1.00 (Reference) |         | 1.00 (Reference)             |         | 1.00 (Reference)                               |         | 1.00 (Reference)                                                   |         |
|             | 4 - High ( $\geq 75$ to $<90$ th pctl) | 1.75 (1.48–2.07) | <0.0001 | 1.74 (1.48–2.06)             | <0.0001 | 1.51 (1.26–1.82)                               | <0.0001 | 1.45 (1.19–1.75)                                                   | 0.0002  |
|             | 5 - Very high ( $\geq 90$ th pctl)     | 3.73 (3.19–4.36) | <0.0001 | 3.53 (3.02–4.14)             | <0.0001 | 2.71 (2.28–3.23)                               | <0.0001 | 2.68 (2.21–3.25)                                                   | <0.0001 |
| Ovary       | 1 - Very low ( $\leq 10$ th pctl)      | 0.66 (0.57–0.77) | <0.0001 | 0.61 (0.52–0.71)             | <0.0001 | 0.58 (0.48–0.71)                               | <0.0001 | 0.57 (0.46–0.71)                                                   | <0.0001 |
|             | 2 - Low ( $>10$ to $\leq 25$ th pctl)  | 0.58 (0.49–0.69) | <0.0001 | 0.58 (0.49–0.69)             | <0.0001 | 0.65 (0.52–0.80)                               | <0.0001 | 0.64 (0.52–0.80)                                                   | 0.0001  |
|             | 3 - Medium ( $>25$ to $<75$ th pctl)   | 1.00 (Reference) |         | 1.00 (Reference)             |         | 1.00 (Reference)                               |         | 1.00 (Reference)                                                   |         |
|             | 4 - High ( $\geq 75$ to $<90$ th pctl) | 2.13 (1.81–2.50) | <0.0001 | 2.13 (1.81–2.51)             | <0.0001 | 2.12 (1.72–2.60)                               | <0.0001 | 2.09 (1.66–2.63)                                                   | <0.0001 |
|             | 5 - Very high ( $\geq 90$ th pctl)     | 2.36 (1.98–2.82) | <0.0001 | 2.53 (2.12–3.03)             | <0.0001 | 2.27 (1.81–2.86)                               | <0.0001 | 2.28 (1.75–2.96)                                                   | <0.0001 |
| Stomach     | 1 - Very low ( $\leq 10$ th pctl)      | 0.88 (0.77–1.01) | 0.0627  | 0.86 (0.76–0.99)             | 0.0301  | 0.93 (0.76–1.14)                               | 0.4691  | 0.92 (0.75–1.12)                                                   | 0.3972  |
|             | 2 - Low ( $>10$ to $\leq 25$ th pctl)  | 0.82 (0.72–0.94) | 0.0031  | 0.82 (0.72–0.93)             | 0.003   | 0.86 (0.70–1.06)                               | 0.1488  | 0.86 (0.70–1.06)                                                   | 0.1462  |
|             | 3 - Medium ( $>25$ to $<75$ th pctl)   | 1.00 (Reference) |         | 1.00 (Reference)             |         | 1.00 (Reference)                               |         | 1.00 (Reference)                                                   |         |

|           |                                         |                  |            |                  |            |                  |            |                  |            |
|-----------|-----------------------------------------|------------------|------------|------------------|------------|------------------|------------|------------------|------------|
|           | 4 - High ( $\geq 75$ to $< 90$ th pctl) | 1.57 (1.39–1.78) | $< 0.0001$ | 1.55 (1.37–1.77) | $< 0.0001$ | 1.42 (1.16–1.73) | 0.0006     | 1.40 (1.13–1.74) | 0.0018     |
|           | 5 - Very high ( $\geq 90$ th pctl)      | 1.69 (1.47–1.95) | $< 0.0001$ | 1.69 (1.47–1.95) | $< 0.0001$ | 1.15 (0.91–1.44) | 0.234      | 1.14 (0.88–1.47) | 0.3184     |
| Pancreas  | 1 - Very low ( $\leq 10$ th pctl)       | 1.16 (1.06–1.27) | 0.0009     | 1.17 (1.07–1.28) | 0.0008     | 0.93 (0.81–1.06) | 0.2527     | 0.88 (0.74–1.05) | 0.1465     |
|           | 2 - Low ( $> 10$ to $\leq 25$ th pctl)  | 0.99 (0.91–1.09) | 0.9044     | 1.00 (0.91–1.09) | 0.9333     | 0.90 (0.78–1.03) | 0.1378     | 0.92 (0.79–1.08) | 0.3202     |
|           | 3 - Medium ( $> 25$ to $< 75$ th pctl)  | 1.00 (Reference) |            | 1.00 (Reference) |            | 1.00 (Reference) |            | 1.00 (Reference) |            |
|           | 4 - High ( $\geq 75$ to $< 90$ th pctl) | 1.11 (1.02–1.22) | 0.0225     | 1.15 (1.04–1.26) | 0.004      | 1.18 (1.03–1.35) | 0.0198     | 1.15 (0.99–1.33) | 0.0716     |
|           | 5 - Very high ( $\geq 90$ th pctl)      | 1.20 (1.09–1.32) | 0.0002     | 1.26 (1.15–1.39) | $< 0.0001$ | 1.25 (1.08–1.44) | 0.0025     | 1.21 (1.04–1.41) | 0.0158     |
| Kidney    | 1 - Very low ( $\leq 10$ th pctl)       | 1.49 (1.22–1.82) | 0.0001     | 1.29 (1.05–1.57) | 0.0148     | 1.29 (0.98–1.69) | 0.0733     | 1.24 (0.89–1.71) | 0.1998     |
|           | 2 - Low ( $> 10$ to $\leq 25$ th pctl)  | 0.79 (0.63–1.00) | 0.0542     | 0.72 (0.56–0.91) | 0.0057     | 0.72 (0.52–1.00) | 0.0492     | 0.73 (0.51–1.06) | 0.0956     |
|           | 3 - Medium ( $> 25$ to $< 75$ th pctl)  | 1.00 (Reference) |            | 1.00 (Reference) |            | 1.00 (Reference) |            | 1.00 (Reference) |            |
|           | 4 - High ( $\geq 75$ to $< 90$ th pctl) | 2.66 (2.24–3.17) | $< 0.0001$ | 2.61 (2.20–3.11) | $< 0.0001$ | 2.01 (1.58–2.55) | $< 0.0001$ | 2.15 (1.65–2.79) | $< 0.0001$ |
|           | 5 - Very high ( $\geq 90$ th pctl)      | 6.42 (5.45–7.56) | $< 0.0001$ | 6.08 (5.16–7.17) | $< 0.0001$ | 2.65 (2.10–3.34) | $< 0.0001$ | 2.68 (2.06–3.50) | $< 0.0001$ |
| Bladder   | 1 - Very low ( $\leq 10$ th pctl)       | 1.30 (1.05–1.61) | 0.0166     | 1.07 (0.86–1.32) | 0.5586     | 0.76 (0.51–1.11) | 0.1579     | 0.82 (0.49–1.37) | 0.4421     |
|           | 2 - Low ( $> 10$ to $\leq 25$ th pctl)  | 0.81 (0.64–1.01) | 0.0622     | 0.72 (0.58–0.90) | 0.0047     | 0.83 (0.58–1.16) | 0.2746     | 0.83 (0.57–1.23) | 0.3582     |
|           | 3 - Medium ( $> 25$ to $< 75$ th pctl)  | 1.00 (Reference) |            | 1.00 (Reference) |            | 1.00 (Reference) |            | 1.00 (Reference) |            |
|           | 4 - High ( $\geq 75$ to $< 90$ th pctl) | 2.22 (1.88–2.61) | $< 0.0001$ | 2.27 (1.92–2.67) | $< 0.0001$ | 1.84 (1.40–2.41) | $< 0.0001$ | 1.84 (1.37–2.46) | $< 0.0001$ |
|           | 5 - Very high ( $\geq 90$ th pctl)      | 5.58 (4.82–6.47) | $< 0.0001$ | 5.56 (4.80–6.45) | $< 0.0001$ | 2.71 (2.13–3.45) | $< 0.0001$ | 2.59 (1.99–3.36) | $< 0.0001$ |
| Esophagus | 1 - Very low ( $\leq 10$ th pctl)       | 0.94 (0.78–1.13) | 0.5354     | 0.91 (0.75–1.09) | 0.3039     | 0.78 (0.61–1.00) | 0.054      | 0.82 (0.63–1.07) | 0.1406     |
|           | 2 - Low ( $> 10$ to $\leq 25$ th pctl)  | 1.03 (0.86–1.24) | 0.719      | 1.04 (0.86–1.24) | 0.7127     | 0.93 (0.72–1.19) | 0.5518     | 0.98 (0.74–1.31) | 0.9019     |
|           | 3 - Medium ( $> 25$ to $< 75$ th pctl)  | 1.00 (Reference) |            | 1.00 (Reference) |            | 1.00 (Reference) |            | 1.00 (Reference) |            |
|           | 4 - High ( $\geq 75$ to $< 90$ th pctl) | 1.52 (1.27–1.82) | $< 0.0001$ | 1.57 (1.31–1.88) | $< 0.0001$ | 1.22 (0.95–1.58) | 0.1161     | 1.30 (0.98–1.71) | 0.0645     |
|           | 5 - Very high ( $\geq 90$ th pctl)      | 2.05 (1.71–2.47) | $< 0.0001$ | 2.12 (1.76–2.55) | $< 0.0001$ | 1.60 (1.24–2.06) | 0.0003     | 1.57 (1.15–2.15) | 0.0046     |
| Other GI  | 1 - Very low ( $\leq 10$ th pctl)       | 1.22 (0.96–1.55) | 0.0959     | 1.20 (0.94–1.52) | 0.1408     | 1.10 (0.76–1.59) | 0.6226     | 1.07 (0.73–1.57) | 0.7339     |
|           | 2 - Low ( $> 10$ to $\leq 25$ th pctl)  | 0.78 (0.60–1.00) | 0.0528     | 0.75 (0.58–0.97) | 0.0312     | 0.63 (0.41–0.97) | 0.0342     | 0.63 (0.41–0.96) | 0.0325     |
|           | 3 - Medium ( $> 25$ to $< 75$ th pctl)  | 1.00 (Reference) |            | 1.00 (Reference) |            | 1.00 (Reference) |            | 1.00 (Reference) |            |
|           | 4 - High ( $\geq 75$ to $< 90$ th pctl) | 1.89 (1.51–2.37) | $< 0.0001$ | 1.95 (1.55–2.44) | $< 0.0001$ | 1.97 (1.38–2.81) | 0.0002     | 1.95 (1.32–2.88) | 0.0009     |
|           | 5 - Very high ( $\geq 90$ th pctl)      | 2.46 (1.96–3.09) | $< 0.0001$ | 2.47 (1.96–3.10) | $< 0.0001$ | 1.72 (1.16–2.54) | 0.0066     | 1.70 (1.14–2.55) | 0.0099     |
| Thyroid   | 1 - Very low ( $\leq 10$ th pctl)       | 1.96 (1.07–3.57) | 0.0281     | 1.46 (0.80–2.67) | 0.2203     | 0.61 (0.26–1.41) | 0.2469     | 0.54 (0.19–1.50) | 0.2354     |
|           | 2 - Low ( $> 10$ to $\leq 25$ th pctl)  | 1.12 (0.58–2.14) | 0.7395     | 1.01 (0.53–1.94) | 0.9799     | 0.66 (0.25–1.79) | 0.4152     | 0.73 (0.23–2.28) | 0.5897     |
|           | 3 - Medium ( $> 25$ to $< 75$ th pctl)  | 1.00 (Reference) |            | 1.00 (Reference) |            | 1.00 (Reference) |            | 1.00 (Reference) |            |
|           | 4 - High ( $\geq 75$ to $< 90$ th pctl) | 0.76 (0.37–1.58) | 0.469      | 0.96 (0.46–1.99) | 0.9061     | 0.56 (0.23–1.38) | 0.2089     | 0.60 (0.23–1.53) | 0.2802     |
|           | 5 - Very high ( $\geq 90$ th pctl)      | 4.82 (3.05–7.60) | $< 0.0001$ | 5.51 (3.46–8.79) | $< 0.0001$ | 2.40 (1.33–4.33) | 0.0037     | 2.35 (1.21–4.56) | 0.0117     |
| Cervix    | 1 - Very low ( $\leq 10$ th pctl)       | 0.77 (0.51–1.16) | 0.2134     | 0.70 (0.46–1.06) | 0.0926     | 0.69 (0.45–1.07) | 0.0939     | 0.65 (0.40–1.07) | 0.092      |
|           | 2 - Low ( $> 10$ to $\leq 25$ th pctl)  | 0.62 (0.39–0.99) | 0.0453     | 0.58 (0.36–0.92) | 0.0203     | 0.65 (0.40–1.05) | 0.078      | 0.65 (0.39–1.08) | 0.0954     |
|           | 3 - Medium ( $> 25$ to $< 75$ th pctl)  | 1.00 (Reference) |            | 1.00 (Reference) |            | 1.00 (Reference) |            | 1.00 (Reference) |            |
|           | 4 - High ( $\geq 75$ to $< 90$ th pctl) | 2.73 (1.94–3.85) | $< 0.0001$ | 2.73 (1.94–3.86) | $< 0.0001$ | 1.84 (1.27–2.67) | 0.0014     | 1.80 (1.16–2.77) | 0.0081     |
|           | 5 - Very high ( $\geq 90$ th pctl)      | 4.73 (3.31–6.74) | $< 0.0001$ | 4.79 (3.35–6.87) | $< 0.0001$ | 2.66 (1.80–3.92) | $< 0.0001$ | 2.64 (1.68–4.13) | $< 0.0001$ |
| Testis    | 1 - Very low ( $\leq 10$ th pctl)       | 1.59 (0.48–5.27) | 0.4515     | 1.24 (0.35–4.41) | 0.7409     | 0.41 (0.09–1.79) | 0.2362     | NA               |            |

|                    |                                |                   |         |                   |         |                  |         |                  |         |
|--------------------|--------------------------------|-------------------|---------|-------------------|---------|------------------|---------|------------------|---------|
|                    | 2 - Low (>10 to ≤25th pctl)    | 0.68 (0.14–3.20)  | 0.6244  | 0.55 (0.12–2.65)  | 0.4593  | 0.34 (0.04–3.15) | 0.3398  | NA               |         |
|                    | 3 - Medium (>25 to <75th pctl) | 1.00 (Reference)  |         | 1.00 (Reference)  |         | 1.00 (Reference) |         | NA               |         |
|                    | 4 - High (≥75 to <90th pctl)   | 0.48 (0.06–3.84)  | 0.4889  | 0.37 (0.05–3.10)  | 0.3623  | -                |         | NA               |         |
|                    | 5 - Very high (≥90th pctl)     | 6.61 (2.47–17.71) | 0.0002  | 7.51 (2.74–20.59) | <0.0001 | 0.95 (0.25–3.66) | 0.9399  | NA               |         |
| Endometrium        | 1 - Very low (≤10th pctl)      | 1.82 (1.41–2.35)  | <0.0001 | 1.49 (1.15–1.92)  | 0.0026  | 1.29 (0.95–1.76) | 0.0985  | 1.30 (0.95–1.77) | 0.1027  |
|                    | 2 - Low (>10 to ≤25th pctl)    | 1.25 (0.95–1.65)  | 0.1067  | 1.14 (0.86–1.50)  | 0.3552  | 1.17 (0.85–1.61) | 0.3274  | 1.17 (0.83–1.65) | 0.3724  |
|                    | 3 - Medium (>25 to <75th pctl) | 1.00 (Reference)  |         | 1.00 (Reference)  |         | 1.00 (Reference) |         | 1.00 (Reference) |         |
|                    | 4 - High (≥75 to <90th pctl)   | 2.90 (2.30–3.66)  | <0.0001 | 3.05 (2.41–3.85)  | <0.0001 | 2.44 (1.83–3.23) | <0.0001 | 2.45 (1.83–3.28) | <0.0001 |
|                    | 5 - Very high (≥90th pctl)     | 7.80 (6.30–9.66)  | <0.0001 | 8.73 (7.04–10.82) | <0.0001 | 5.21 (3.97–6.83) | <0.0001 | 5.20 (3.88–6.97) | <0.0001 |
| Brain              | 1 - Very low (≤10th pctl)      | 1.69 (1.50–1.91)  | <0.0001 | 1.43 (1.27–1.62)  | <0.0001 | NA               |         | NA               |         |
|                    | 2 - Low (>10 to ≤25th pctl)    | 1.20 (1.05–1.37)  | 0.0081  | 1.13 (0.99–1.30)  | 0.0635  | NA               |         | NA               |         |
|                    | 3 - Medium (>25 to <75th pctl) | 1.00 (Reference)  |         | 1.00 (Reference)  |         | NA               |         | NA               |         |
|                    | 4 - High (≥75 to <90th pctl)   | 1.10 (0.94–1.29)  | 0.2457  | 1.15 (0.97–1.35)  | 0.0984  | NA               |         | NA               |         |
|                    | 5 - Very high (≥90th pctl)     | 1.24 (1.05–1.48)  | 0.0135  | 1.26 (1.06–1.49)  | 0.0095  | NA               |         | NA               |         |
| Melanoma           | 1 - Very low (≤10th pctl)      | 1.32 (0.93–1.87)  | 0.1221  | 1.14 (0.80–1.62)  | 0.4773  | 0.99 (0.63–1.57) | 0.9707  | 0.92 (0.53–1.58) | 0.7537  |
|                    | 2 - Low (>10 to ≤25th pctl)    | 0.91 (0.64–1.28)  | 0.5878  | 0.86 (0.61–1.22)  | 0.404   | 0.70 (0.43–1.14) | 0.1517  | 0.69 (0.42–1.14) | 0.1515  |
|                    | 3 - Medium (>25 to <75th pctl) | 1.00 (Reference)  |         | 1.00 (Reference)  |         | 1.00 (Reference) |         | 1.00 (Reference) |         |
|                    | 4 - High (≥75 to <90th pctl)   | 1.84 (1.39–2.43)  | <0.0001 | 1.95 (1.47–2.58)  | <0.0001 | 1.52 (1.06–2.18) | 0.0221  | 1.53 (1.03–2.26) | 0.0334  |
|                    | 5 - Very high (≥90th pctl)     | 5.36 (4.21–6.82)  | <0.0001 | 5.38 (4.22–6.85)  | <0.0001 | 3.35 (2.47–4.54) | <0.0001 | 3.19 (2.23–4.56) | <0.0001 |
| Head and neck      | 1 - Very low (≤10th pctl)      | 1.08 (0.83–1.41)  | 0.5494  | 0.95 (0.73–1.24)  | 0.7299  | 0.93 (0.68–1.26) | 0.6262  | 0.97 (0.69–1.37) | 0.8701  |
|                    | 2 - Low (>10 to ≤25th pctl)    | 0.66 (0.50–0.87)  | 0.0037  | 0.61 (0.46–0.81)  | 0.0006  | 0.61 (0.44–0.83) | 0.0021  | 0.57 (0.41–0.80) | 0.001   |
|                    | 3 - Medium (>25 to <75th pctl) | 1.00 (Reference)  |         | 1.00 (Reference)  |         | 1.00 (Reference) |         | 1.00 (Reference) |         |
|                    | 4 - High (≥75 to <90th pctl)   | 1.61 (1.28–2.02)  | <0.0001 | 1.64 (1.31–2.06)  | <0.0001 | 1.58 (1.22–2.06) | 0.0005  | 1.54 (1.17–2.02) | 0.0018  |
|                    | 5 - Very high (≥90th pctl)     | 3.34 (2.73–4.08)  | <0.0001 | 3.42 (2.79–4.19)  | <0.0001 | 2.97 (2.35–3.75) | <0.0001 | 2.76 (2.14–3.56) | <0.0001 |
| Other solid tumour | 1 - Very low (≤10th pctl)      | 1.31 (1.18–1.45)  | <0.0001 | 1.21 (1.09–1.34)  | 0.0002  | 1.13 (0.91–1.39) | 0.2687  | 1.13 (0.90–1.43) | 0.2911  |
|                    | 2 - Low (>10 to ≤25th pctl)    | 0.86 (0.78–0.95)  | 0.0044  | 0.80 (0.72–0.88)  | <0.0001 | 0.83 (0.67–1.03) | 0.0936  | 0.83 (0.66–1.05) | 0.1201  |
|                    | 3 - Medium (>25 to <75th pctl) | 1.00 (Reference)  |         | 1.00 (Reference)  |         | 1.00 (Reference) |         | 1.00 (Reference) |         |
|                    | 4 - High (≥75 to <90th pctl)   | 1.80 (1.65–1.97)  | <0.0001 | 1.78 (1.63–1.94)  | <0.0001 | 1.59 (1.30–1.94) | <0.0001 | 1.58 (1.28–1.96) | <0.0001 |
|                    | 5 - Very high (≥90th pctl)     | 2.54 (2.32–2.79)  | <0.0001 | 2.62 (2.39–2.88)  | <0.0001 | 2.34 (1.92–2.85) | <0.0001 | 2.34 (1.86–2.94) | <0.0001 |

HR = Hazard ratio; pctl = percentile; NA = Not applicable; \*SS\* = data suppressed due to small number of observations/events. \* Adjusted for age at diagnosis (cat.), year of diagnosis (cont.), and common chronic conditions (asthma, congestive heart failure, chronic obstructive pulmonary disease, hypertension, and diabetes). \*\* Adjusted for age at diagnosis (cat.), year of diagnosis (cont.), common chronic conditions (asthma, congestive heart failure, chronic obstructive pulmonary disease, hypertension, and diabetes), and cancer stage. Only subjects with known cancer stage were included in the analysis. \*\*\* Adjusted for age at diagnosis (cat.), year of diagnosis (cont.), common chronic conditions (asthma, congestive heart failure, chronic obstructive pulmonary disease, hypertension, and diabetes), cancer stage, chemotherapy, and radiotherapy. Only subjects with known cancer stage were included in the analysis. Time-dependent confounding adjustment using marginal structural models.

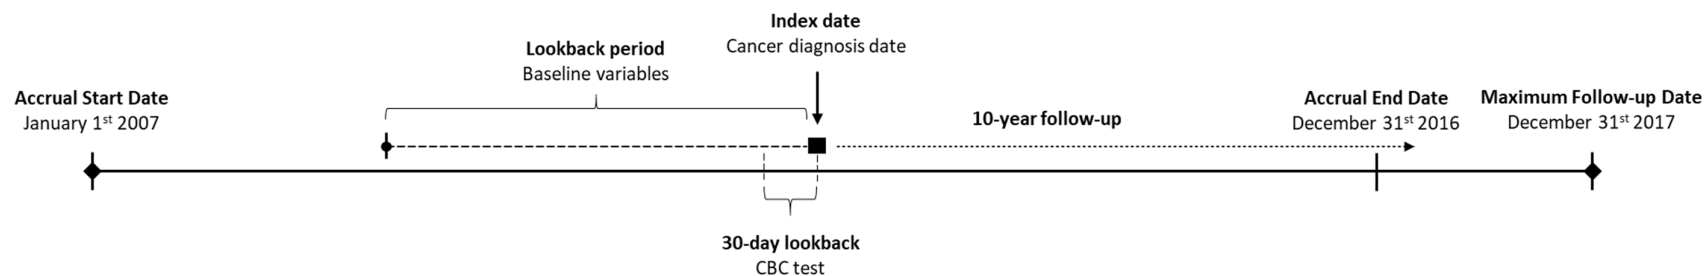

Figure S1. Study design and inclusion criteria among cancer patients.

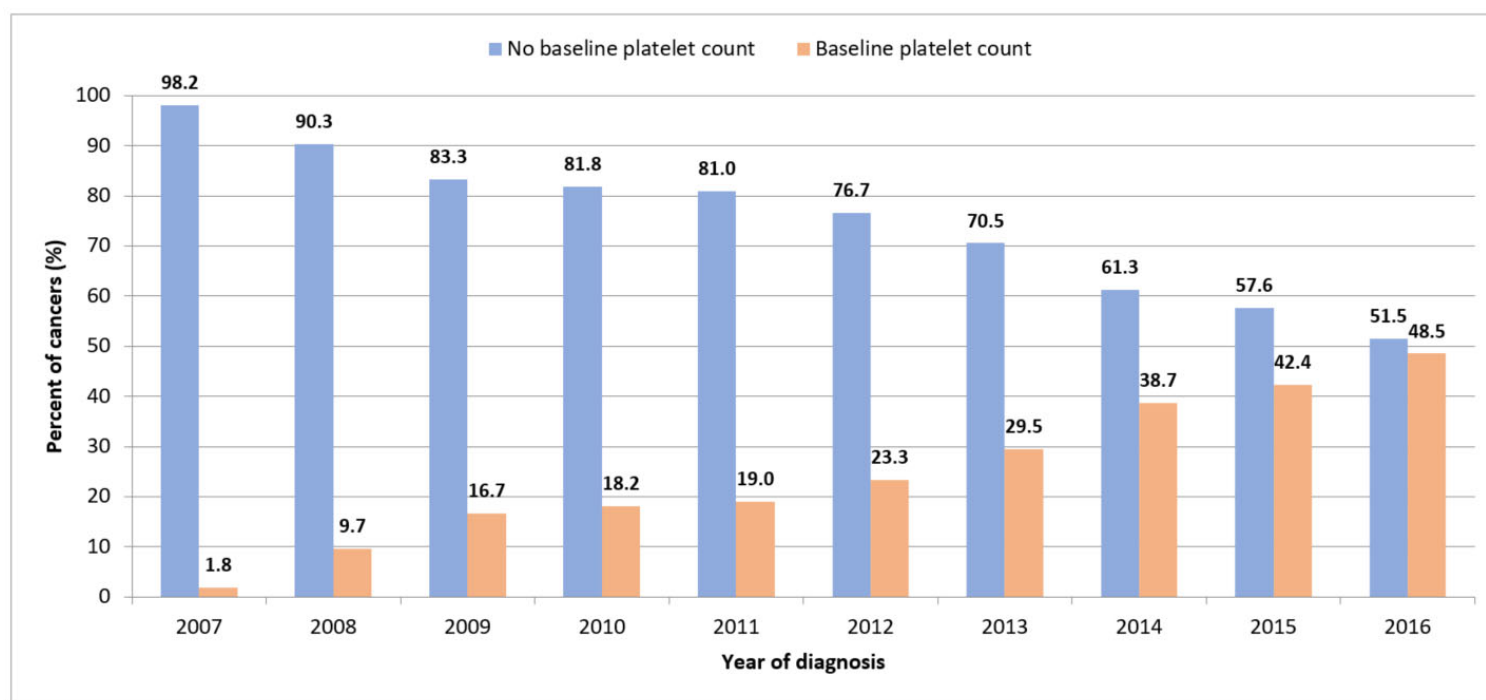

Figure S2. Proportion of cancer patients with a baseline platelet count (within 30 days of cancer diagnosis), by calendar year.

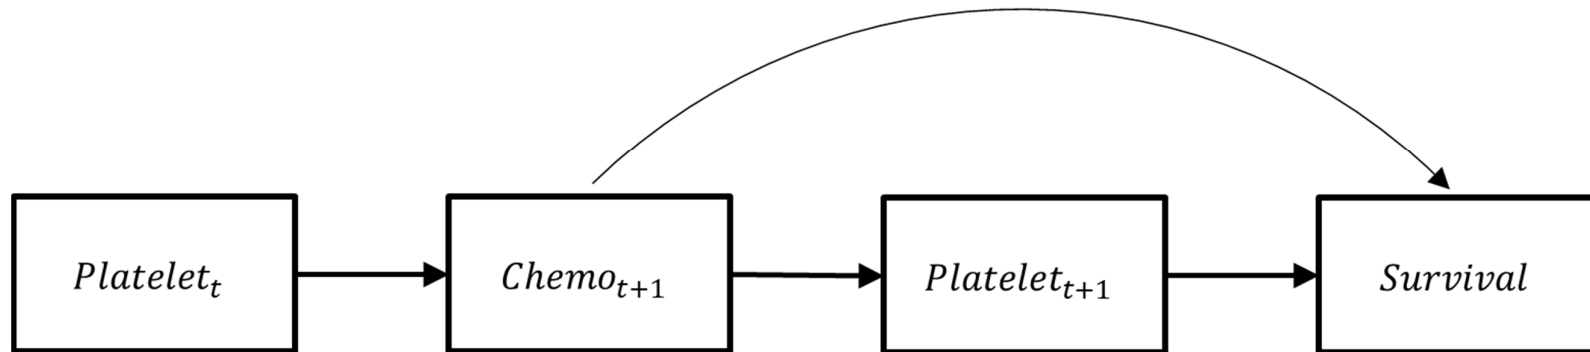

**Figure S3.** Schematic of time-dependent confounding that could occur between platelet count and cancer treatment.

- (1) Platelet count at time  $t$  may influence treatment decision for chemotherapy at time  $t+1$ .
- (2) Chemotherapy at  $t+1$  is causally associated with a higher cancer-specific survival.
- (3) Chemotherapy at time  $t+1$  influences platelet count at time  $t+1$ .
- (4) Platelet count at time  $t+1$  may be associated with survival.



### Exposure weight models:

#### *Numerator model*

$$\text{logit} \left( P(Y_i = y | \beta_0 + \sum \beta_j x_j) \right) = \beta_0 + \sum \beta_j x_j$$

Outcome: platelet count category (at time t)

Predictors: prior platelet count category (t-1), age at diagnosis, year of diagnosis, asthma, CHF, COPD, hypertension, diabetes, and cancer stage.

#### *Denominator model*

$$\text{logit} \left( P(Y_i = y | \beta_0 + \sum \beta_j x_j) \right) = \beta_0 + \sum \beta_j x_j$$

Outcome: platelet count category (at time t)

Predictors: prior platelet count category (t-1), chemotherapy use (at time t), radiotherapy use (at time t), age at diagnosis, year of diagnosis, asthma, CHF, COPD, hypertension, diabetes, and cancer stage.

### Censor weight models:

#### *Numerator model*

$$\text{logit} \left( P(Y = 1 | \beta_0 + \sum \beta_j x_j) \right) = \beta_0 + \sum \beta_j x_j$$

Outcome: Censoring event

Predictors: prior platelet count category (t-1), age at diagnosis, year of diagnosis, asthma, CHF, COPD, hypertension, diabetes, and cancer stage.

#### *Denominator model*

$$\text{logit}\left(P(Y = 1|\beta_0 + \sum \beta_j x_j)\right) = \beta_0 + \sum \beta_j x_j$$

Outcome: Censoring event

Predictors: prior platelet count category (t-1), chemotherapy use (at time t), radiotherapy use (at time t), age at diagnosis, year of diagnosis, asthma, CHF, COPD, hypertension, diabetes, and cancer stage.

**Standardized weights calculations:**

$$SW_t = \frac{\prod_{i=1}^t P_{treat}(Y_i = y)_{num} / P_{treat}(Y_i = y)_{denom}}{\prod_{i=1}^t [((Y_{cens} = 1) \times P_{cens}(Y = 1)_{num} + (Y_{cens} = 0) \times (1 - P_{cens}(Y = 1)_{num})) / ((Y_{cens} = 1) \times P_{cens}(Y = 1)_{denom} + (Y_{cens} = 0) \times (1 - P_{cens}(Y = 1)_{denom}))]}$$

|                              |                                                                                      |
|------------------------------|--------------------------------------------------------------------------------------|
| $P_{treat}(Y_i = y)_{num}$   | Probability of being in treatment class $y$ at time $t$ in the numerator model       |
| $P_{treat}(Y_i = y)_{denom}$ | Probability of being in the treatment class $y$ at time $t$ in the denominator model |
| $P_{cens}(Y = 1)_{num}$      | Probability of being censored at time $t$ in the numerator model                     |
| $P_{cens}(Y = 1)_{denom}$    | Probability of being censored at time $t$ in the denominator model                   |

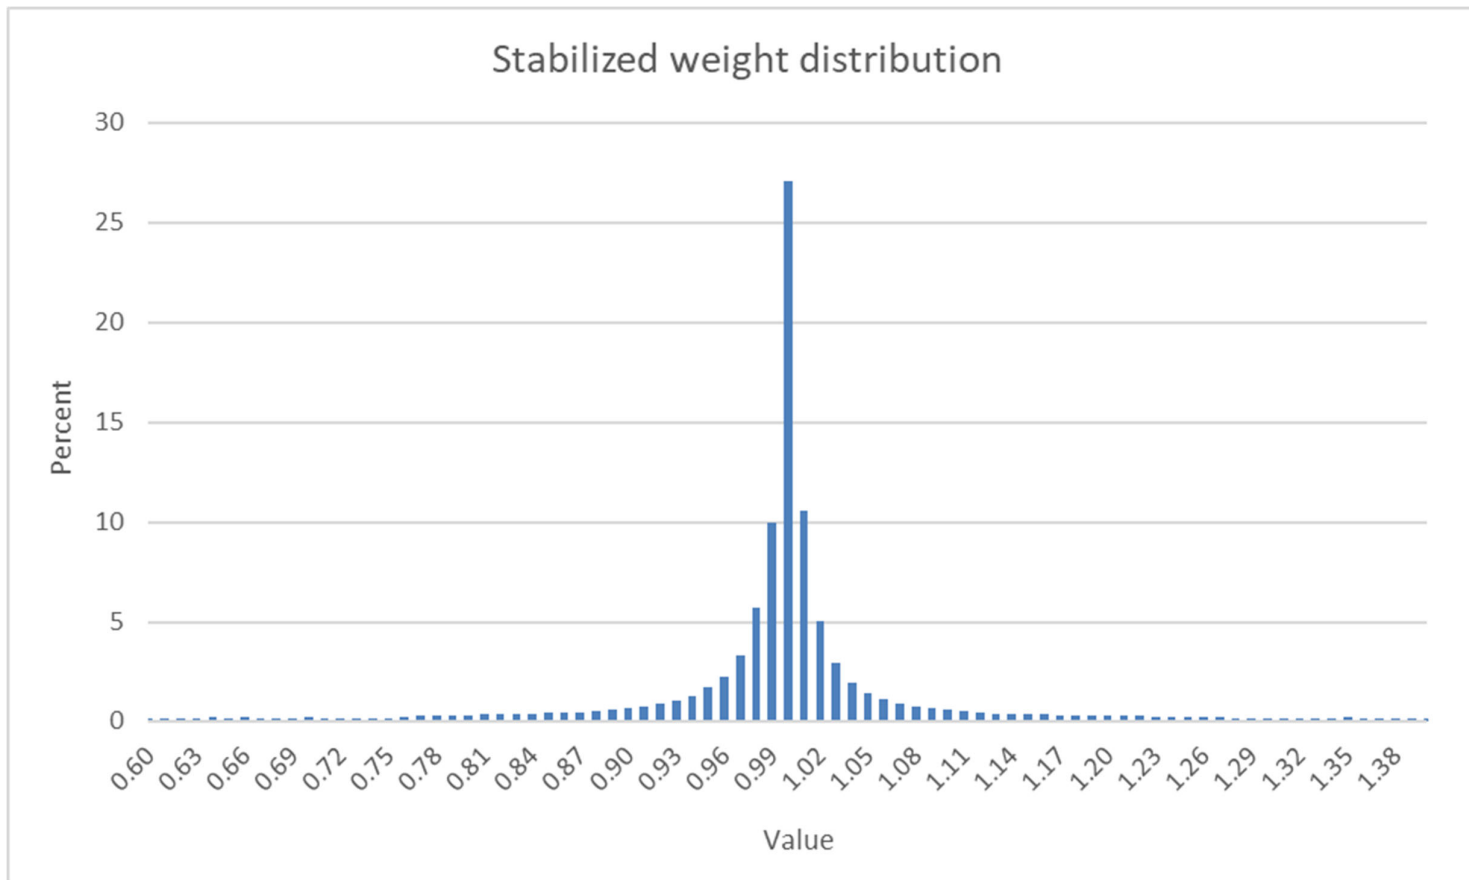

**Figure S4.** Distribution of stabilized weights among observations included in the marginal structural models (exposure definition 1).

|                    |            |
|--------------------|------------|
| N                  | 10,881,327 |
| Mean               | 1.0099     |
| Standard Deviation | 0.3291     |
| Minimum            | 0.0614     |
| Maximum            | 14.1718    |

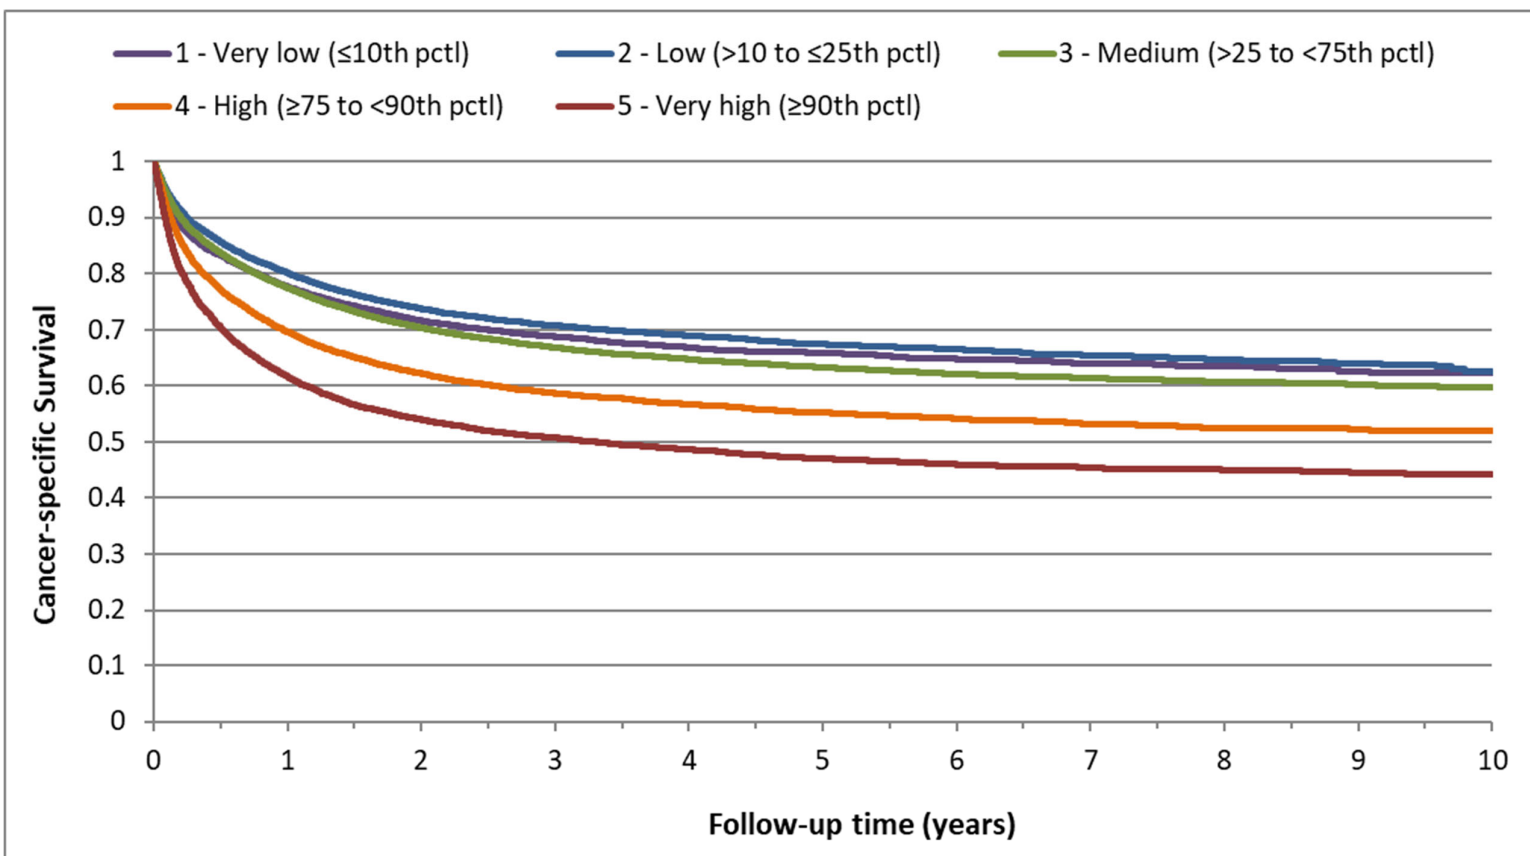

(A) All cancers (n = 112,231)

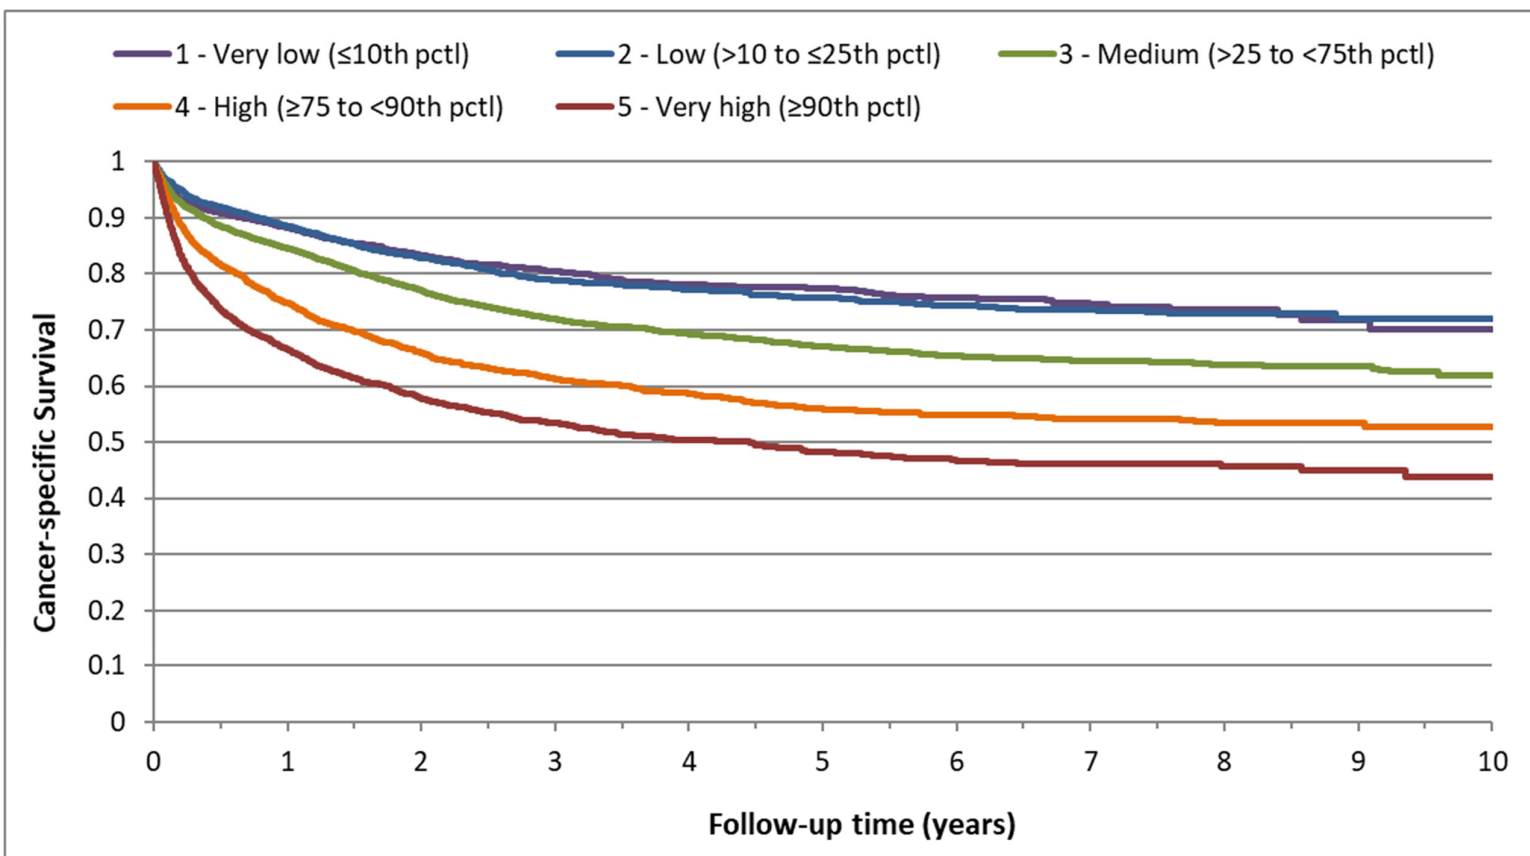

(B) Colon (n = 17,259)

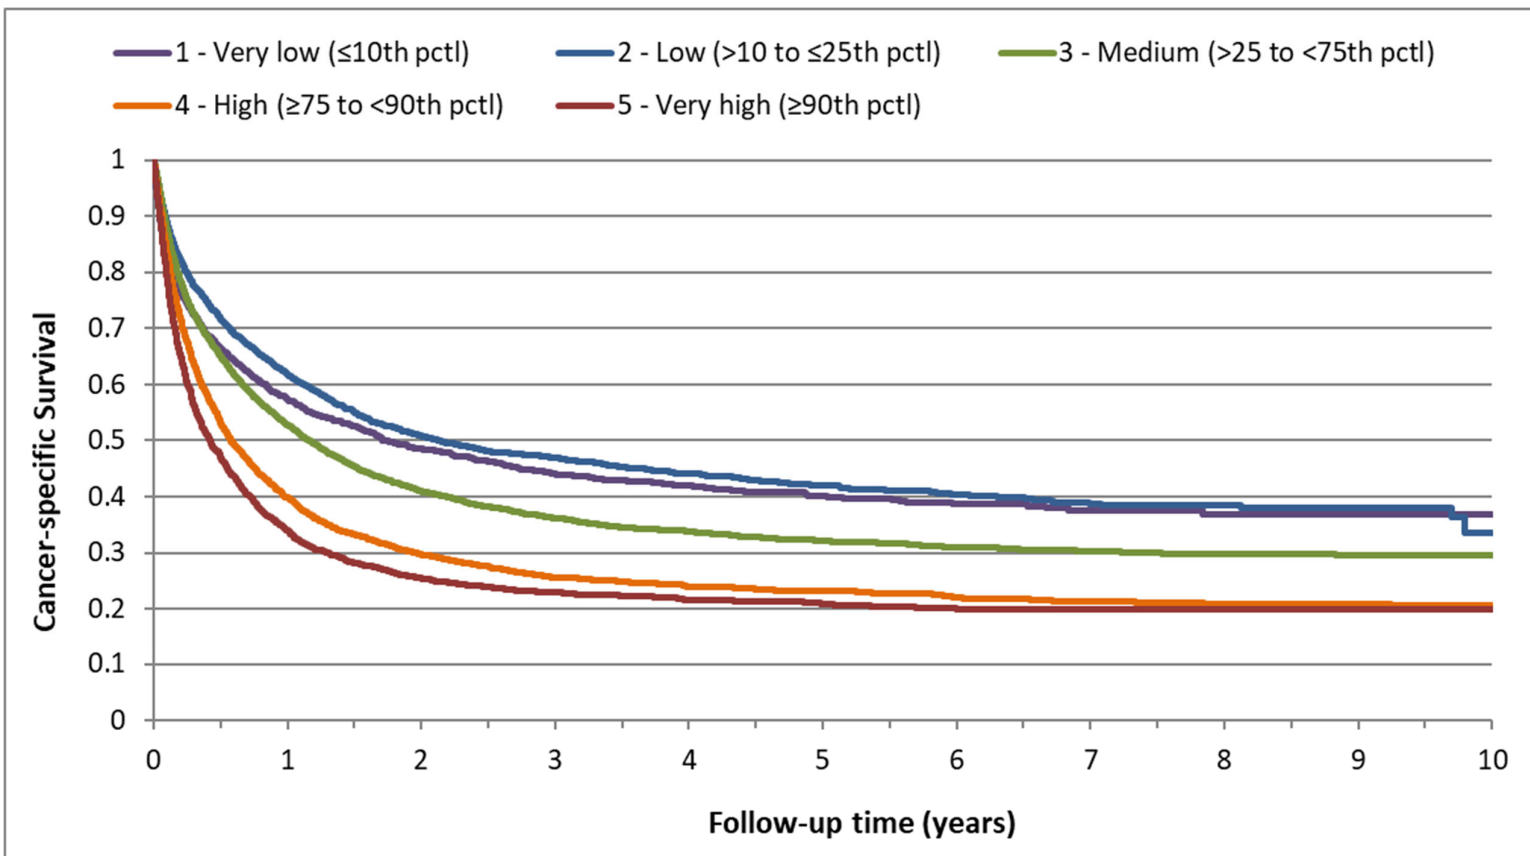

(C) Lung (n = 20,583)

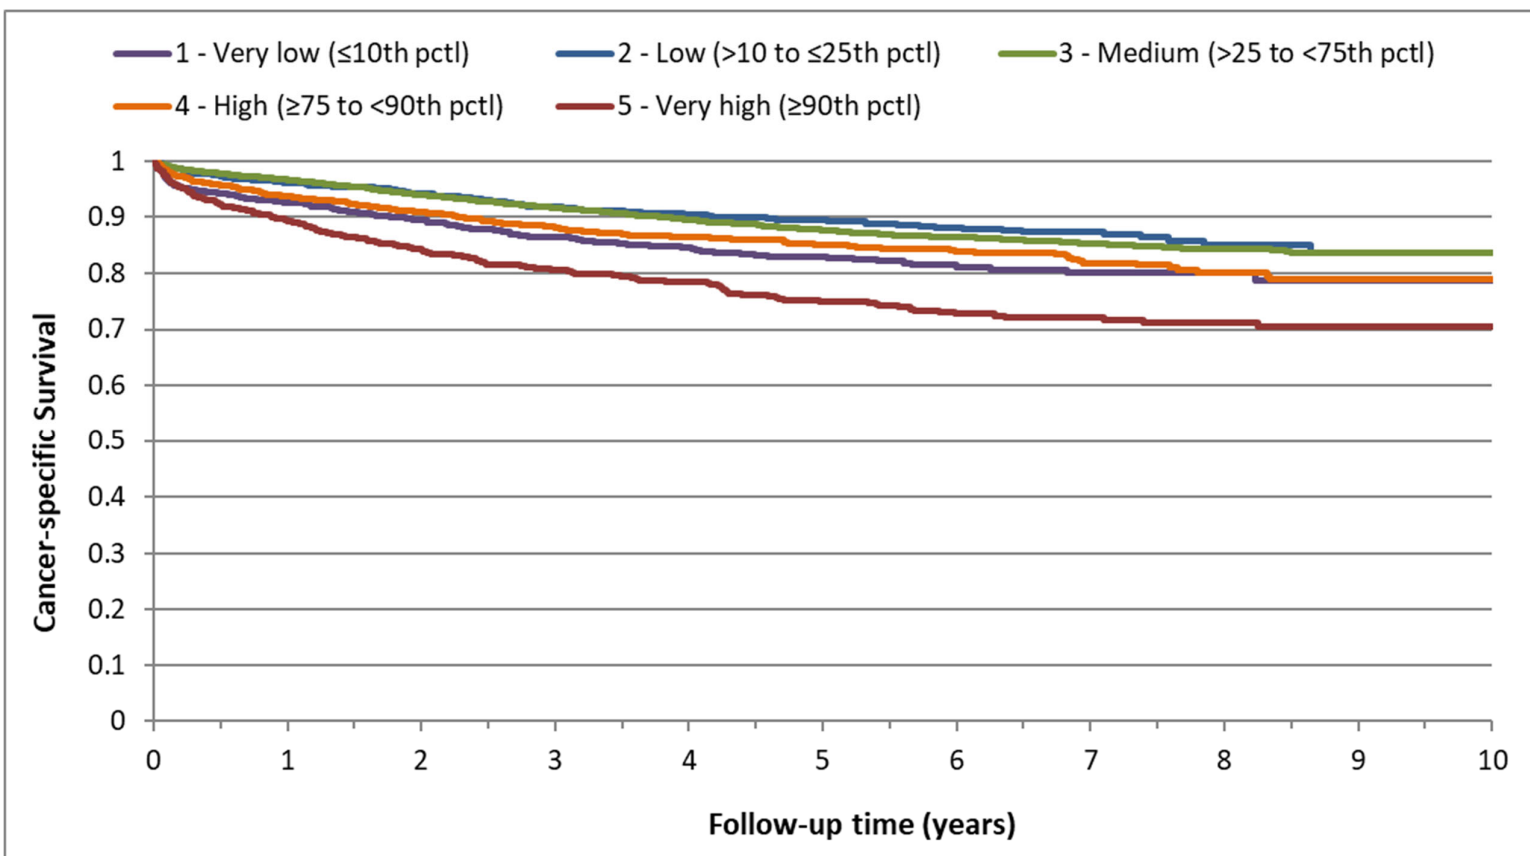

(D) Breast (n = 9,857)

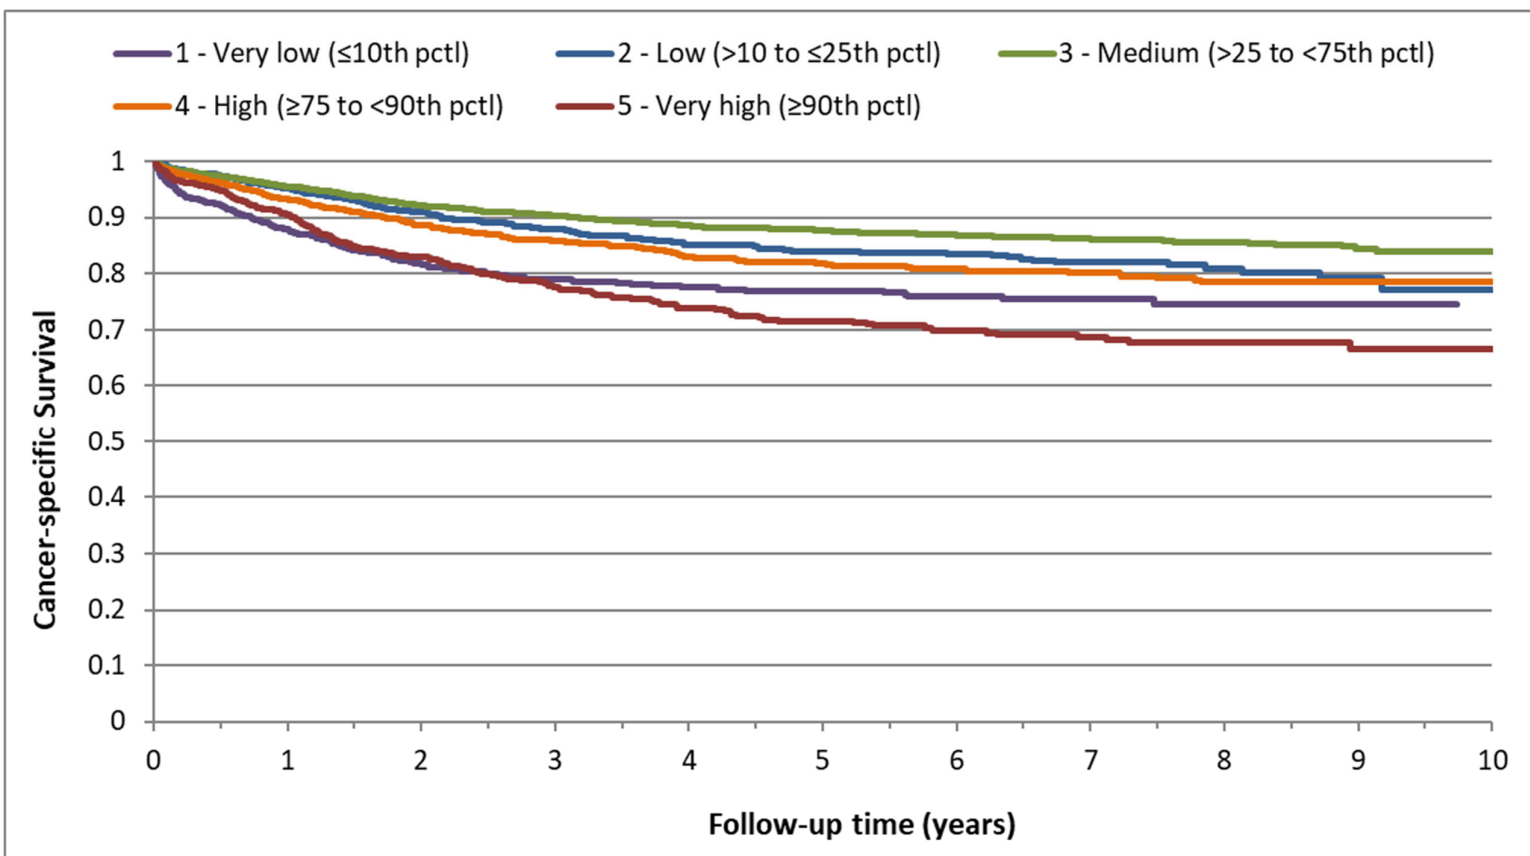

(E) Prostate (n = 8,587)



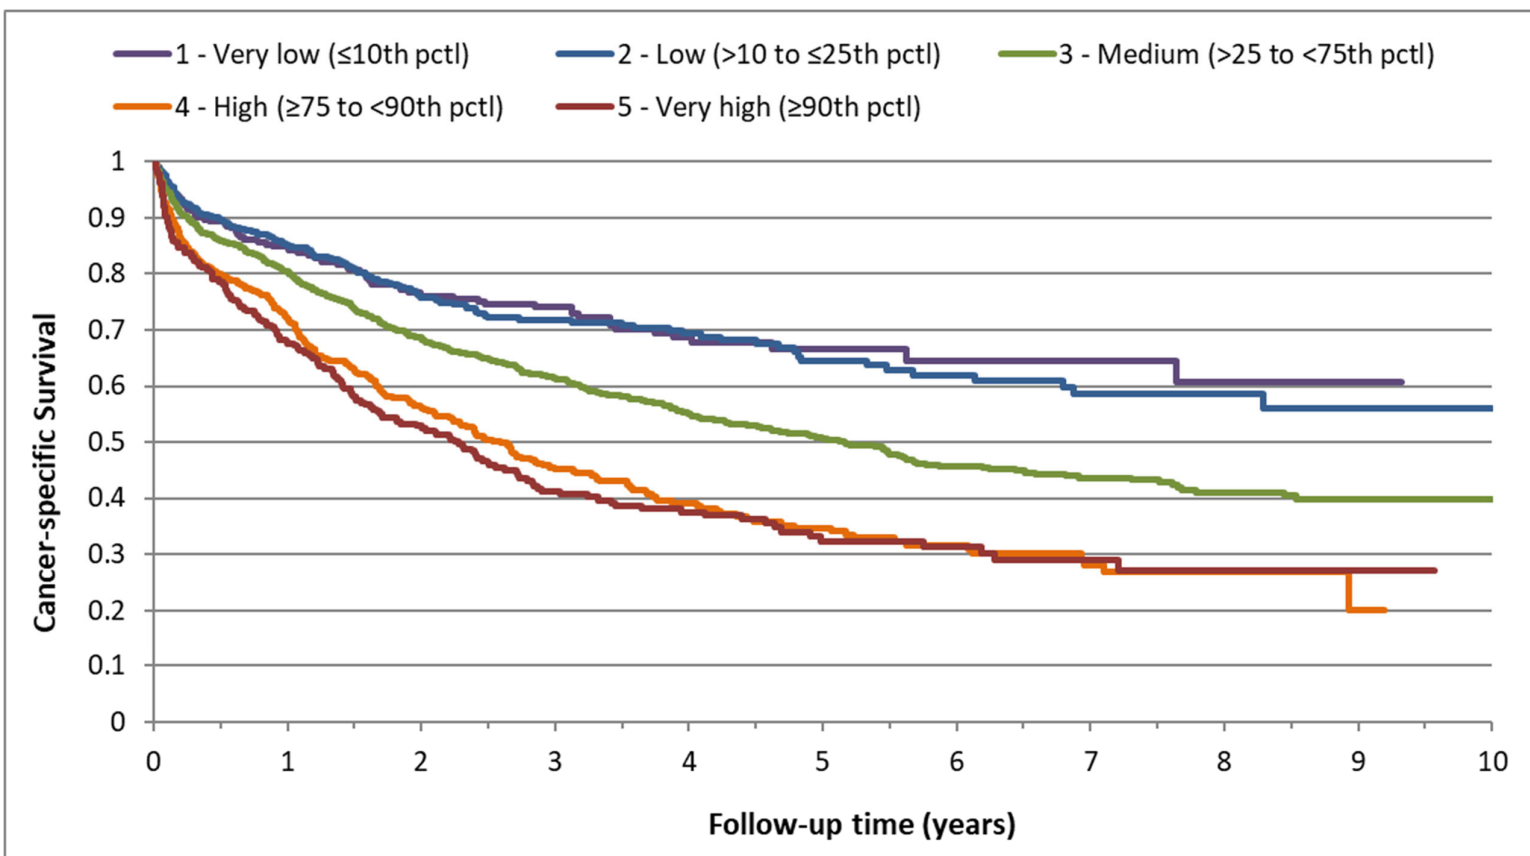

(F) Ovary (n = 3,085)

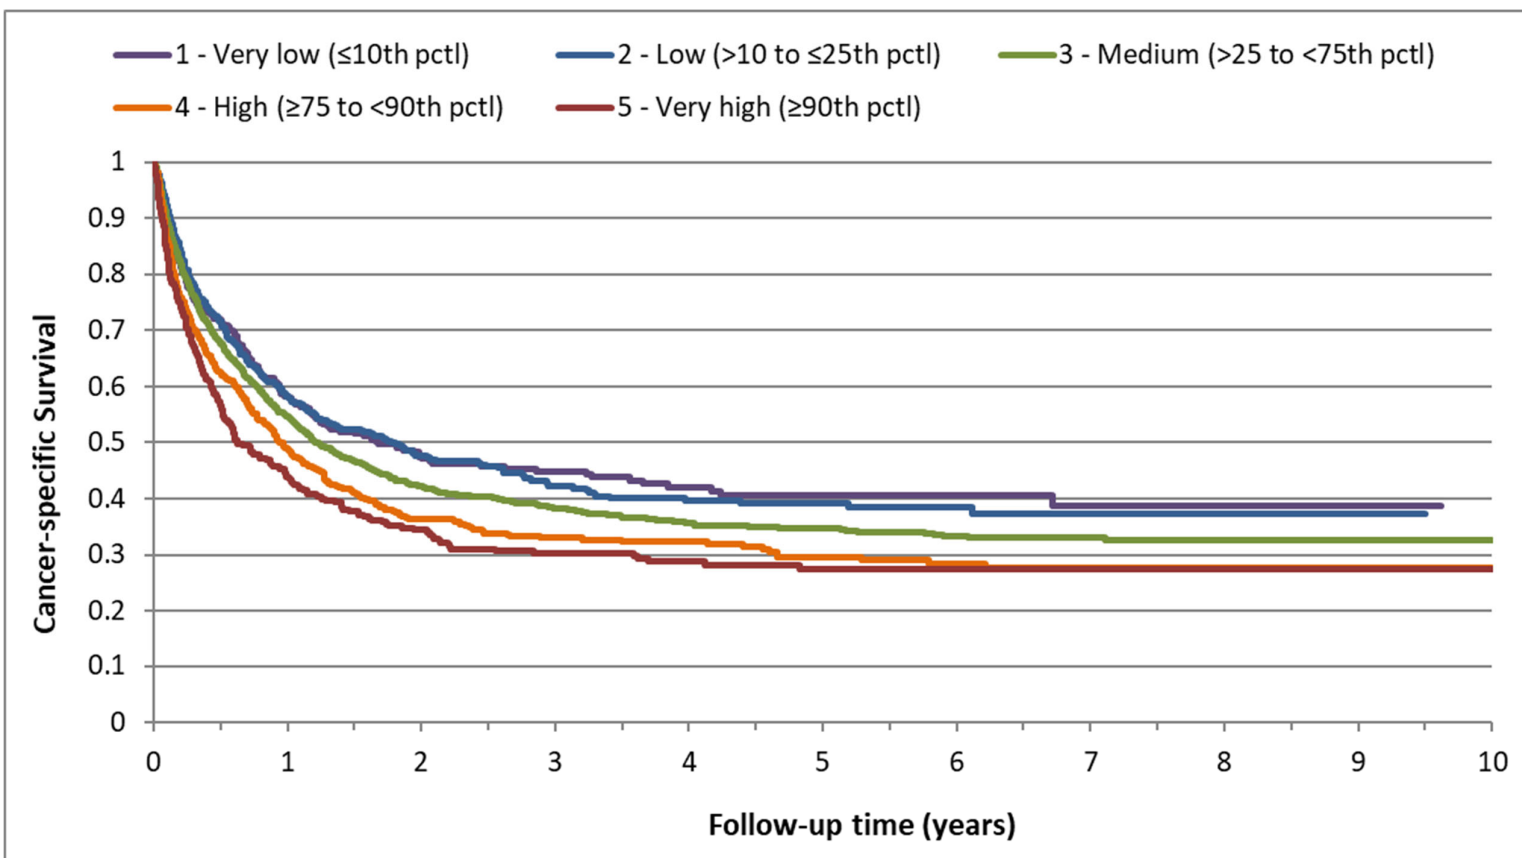

(G) Stomach (n = 3,365)

**Figure S5.** Cancer-specific survival by baseline platelet count category (exposure definition 2), for select cancers.

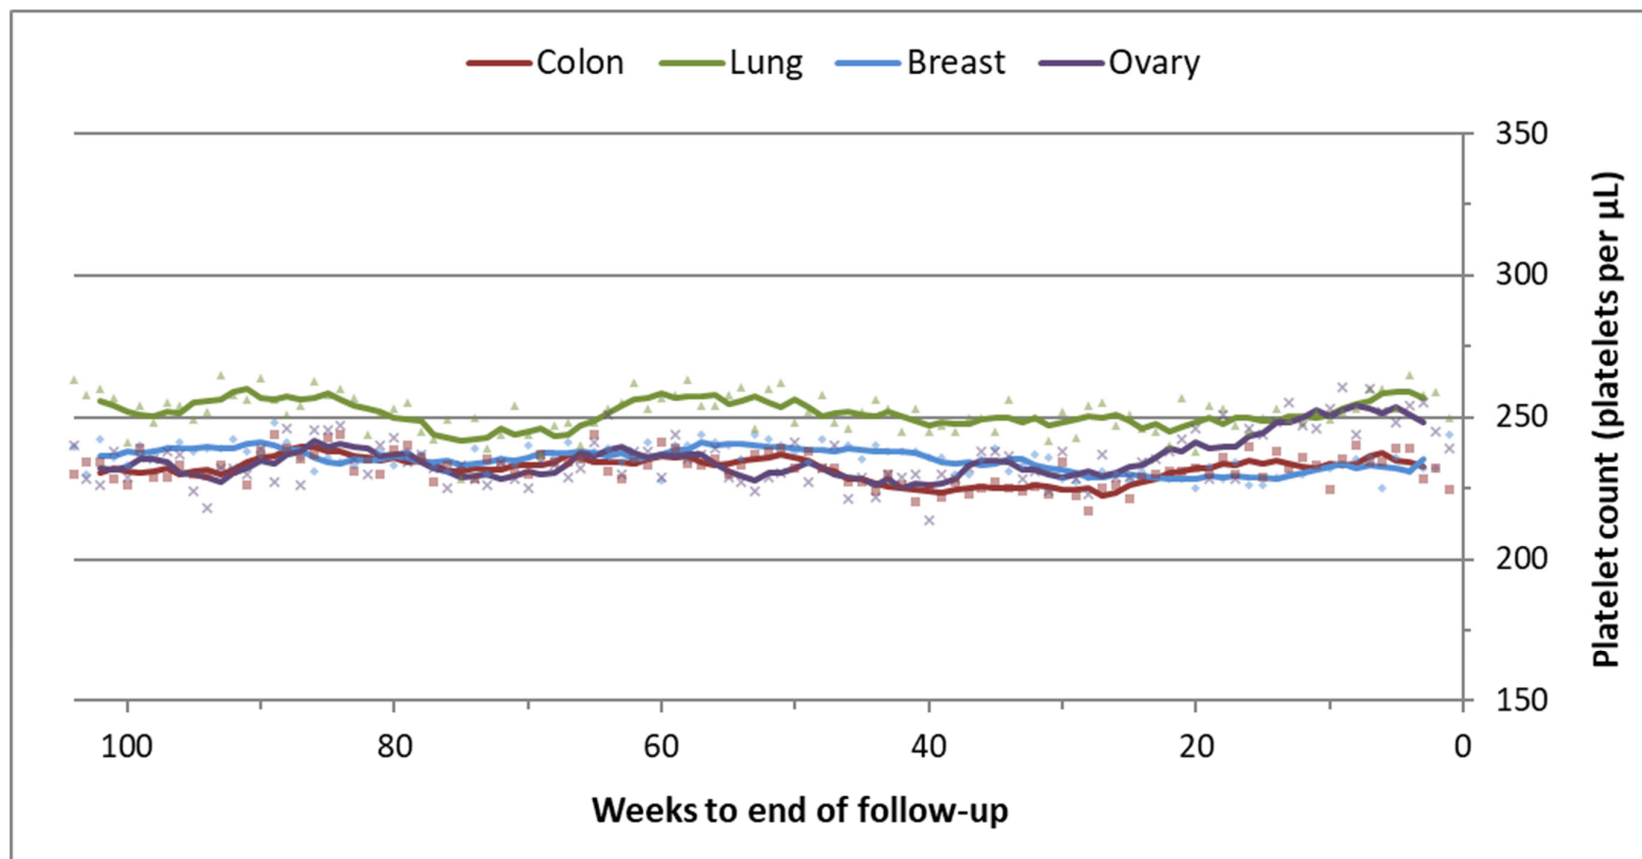

(A) Female patients

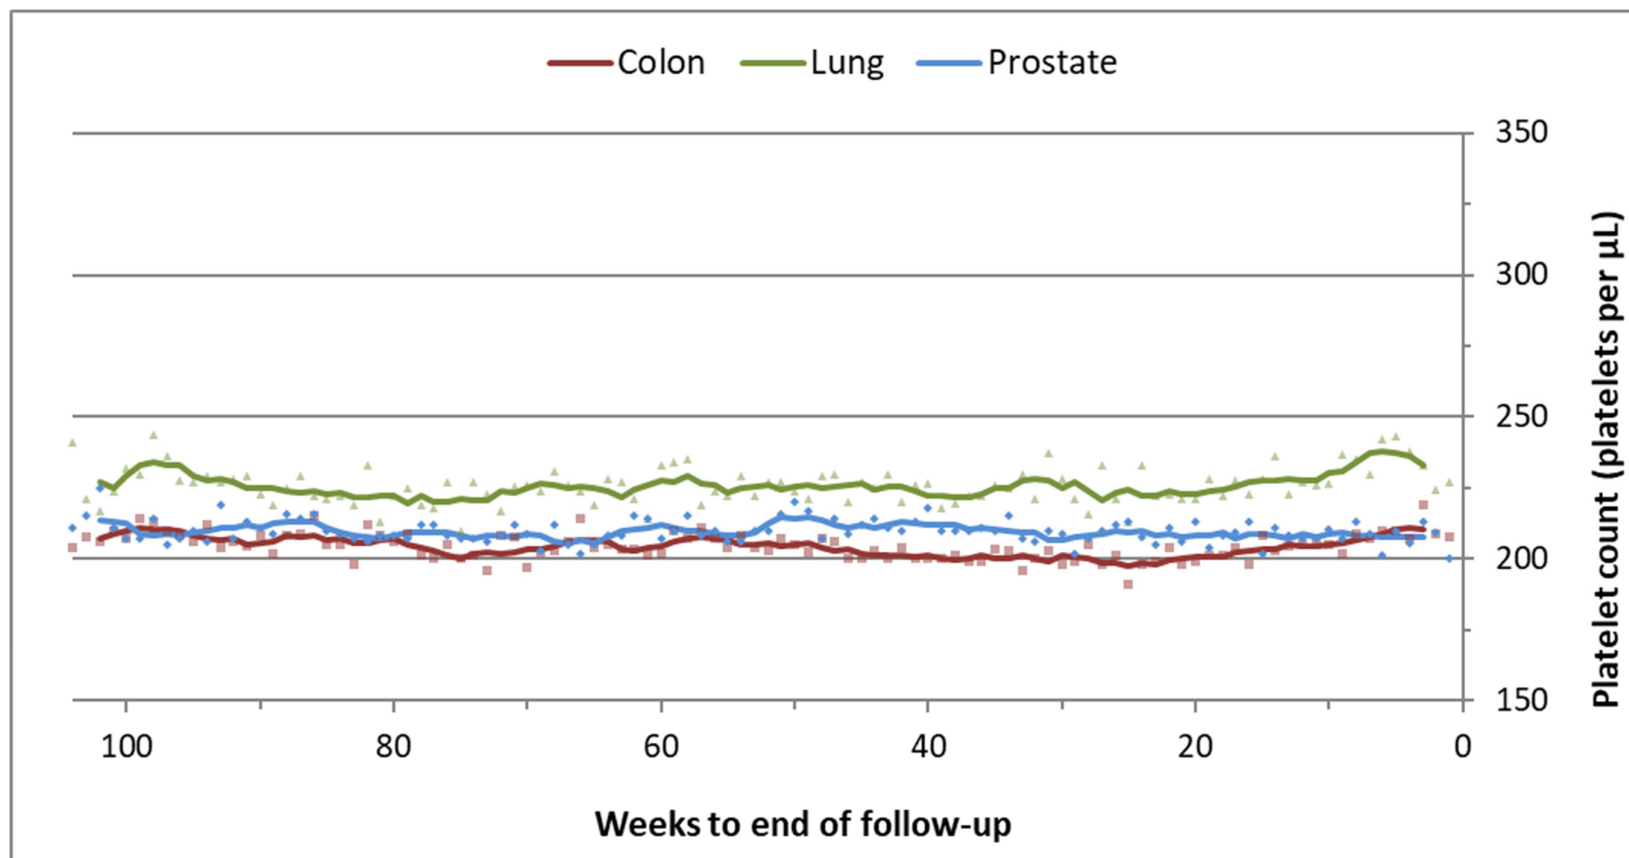

(B) Male patients

**Figure S6.** Median platelet count moving average (period of 5) in the 104 weeks (2 years) preceding end of follow-up, among patients that did not die from their index cancer.

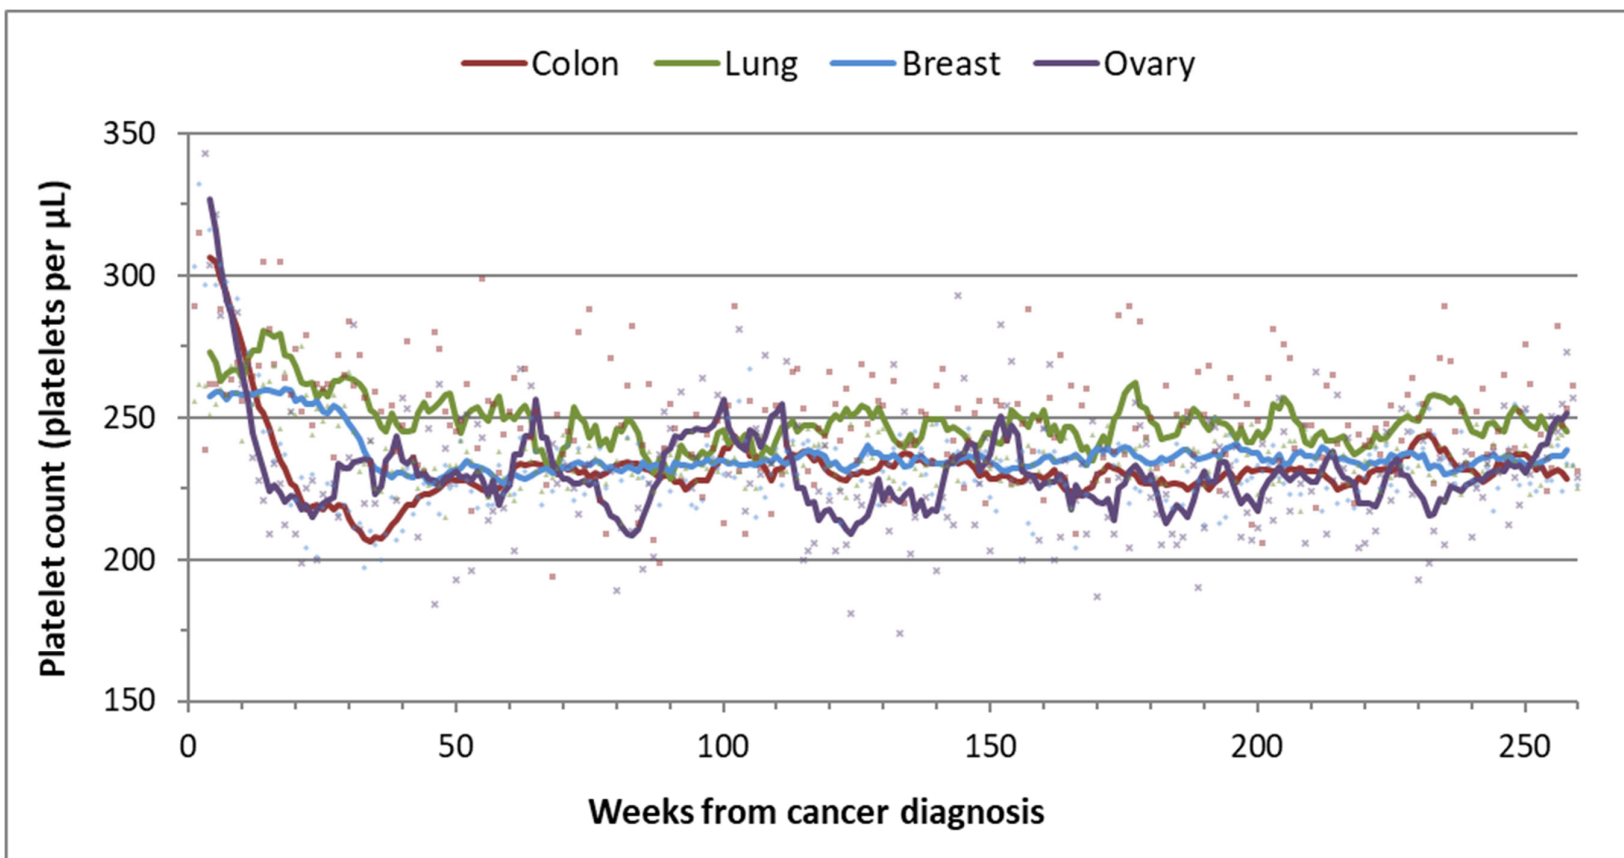

(A) Female patients

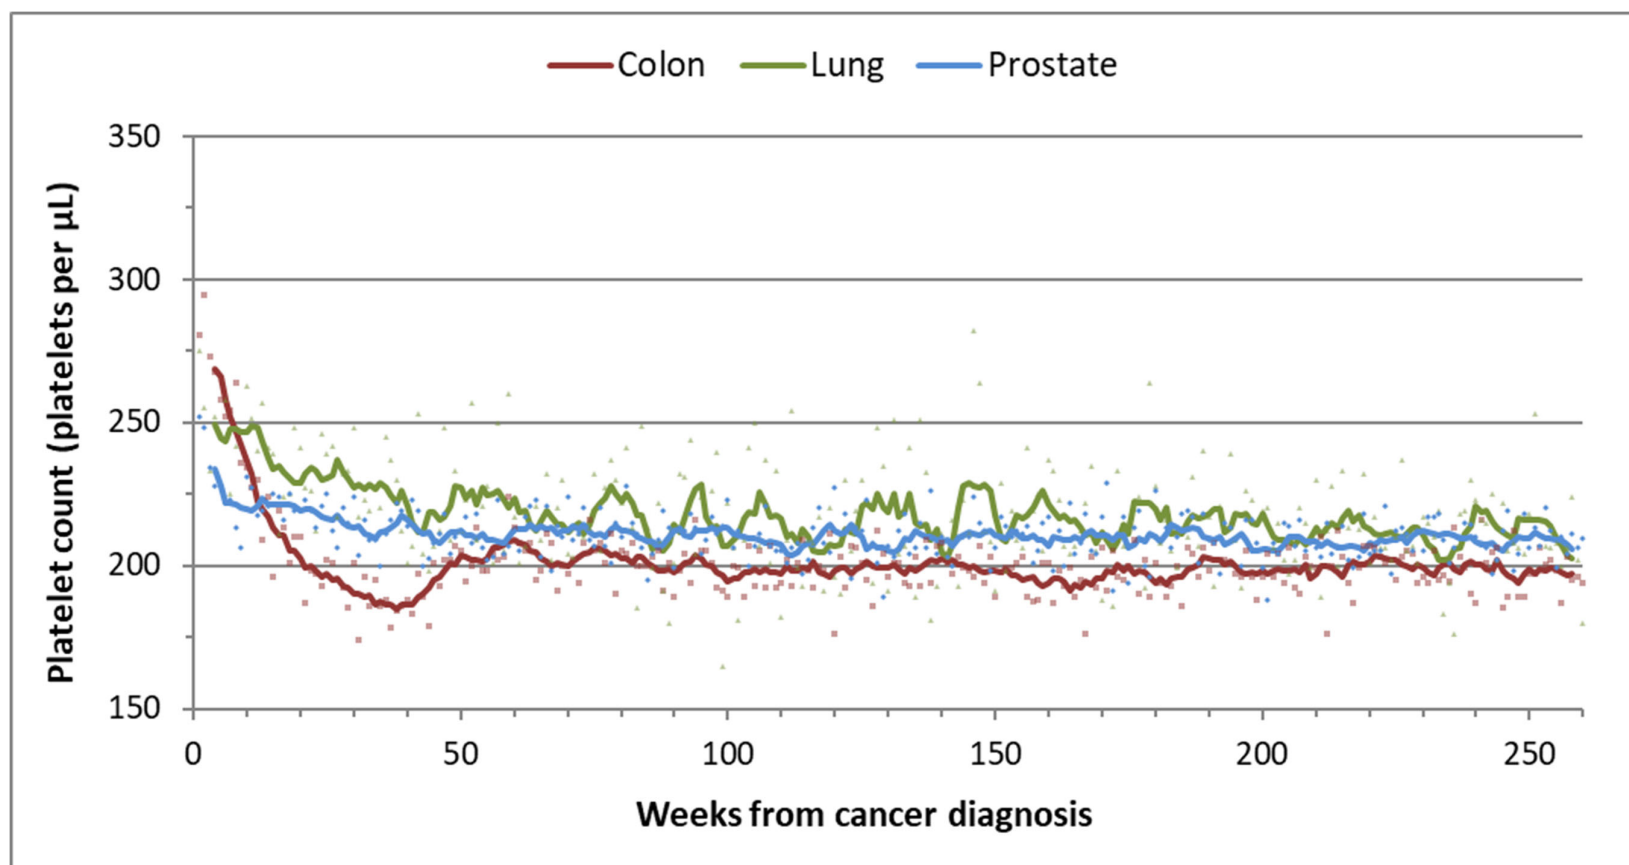

(B) Male patients

**Figure S7.** Median platelet count moving average (period of 7) in the 260 weeks (5 years) following a cancer diagnosis, among patients with at least 5 years of follow-up and did not die from their index cancer.

## References

1. Shah, B.R.; Chiu, M.; Amin, S.; Ramani, M.; Sadry, S.; Tu, J.V. Surname lists to identify South Asian and Chinese ethnicity from secondary data in Ontario, Canada: A validation study. *BMC Med. Res. Methodol.* **2010**, *10*, 42.
2. Robles, S.C.; Marrett, L.D.; Clarke, E.A.; Risch, H.A. An application of capture-recapture methods to the estimation of completeness of cancer registration. *J. Clin Epidemiol.* **1988**, *41*, 495–501.
3. Gershon, A.S.; Guan, J.; Wang, C.; To, T. Trends in asthma prevalence and incidence in Ontario, Canada, 1996–2005: A population study. *Am. J. Epidemiol* **2010**, *172*, 728–36.
4. Schultz, S.E.; Rothwell, D.M.; Chen, Z.; Tu, K. Identifying cases of congestive heart failure from administrative data: A validation study using primary care patient records. *Chronic Dis Inj Can.* **2013**, *33*, 160–6.
5. Gershon, A.S.; Wang, C.; Guan, J.; Vasilevska-Ristovska, J.; Cicutto, L.; To, T. Identifying individuals with physician diagnosed COPD in health administrative databases. *COPD* **2009**, *6*, 388–94.
6. Jaakkimainen, R.L.; Bronskill, S.E.; Tierney, M.C.; et al. Identification of Physician-Diagnosed Alzheimer's Disease and Related Dementias in Population-Based Administrative Data: A Validation Study Using Family Physicians' Electronic Medical Records. *J. Alzheimers Dis* **2016**, *54*, 337–49.
7. Antoniou, T.; Zagorski, B.; Loutfy, M.R.; Strike, C.; Glazier, R.H. Validation of case-finding algorithms derived from administrative data for identifying adults living with human immunodeficiency virus infection. *PLoS ONE* **2011**, *6*, e21748.
8. Tu, K.; Campbell, N.R.; Chen, Z.L.; Cauch-Dudek, K.J.; McAlister, F.A. Accuracy of administrative databases in identifying patients with hypertension. *Open Med.* **2007**, *1*, e18–26.
9. Benchimol, E.I.; Guttman, A.; Mack, D.R.; et al. Validation of international algorithms to identify adults with inflammatory bowel disease in health administrative data from Ontario, Canada. *J. Clin Epidemiol* **2014**, *67*, 887–96.
10. Lipscombe, L.L.; Hwee, J.; Webster, L.; Shah, B.R.; Booth, G.L.; Tu, K. Identifying diabetes cases from administrative data: A population-based validation study. *BMC Health Serv Res* **2018**, *18*, 316.
11. Widdifield, J.; Bombardier, C.; Bernatsky, S.; et al. An administrative data validation study of the accuracy of algorithms for identifying rheumatoid arthritis: The influence of the reference standard on algorithm performance. *BMC Musculoskelet Disord* **2014**, *15*, 216.
12. Mondor, L.; Maxwell, C.J.; Hogan, D.B.; et al. Multimorbidity and healthcare utilization among home care clients with dementia in Ontario, Canada: A retrospective analysis of a population-based cohort. *PLoS Med.* **2017**, *14*, e1002249.
